# Supplementary material
Source: publisher figshare collection journal article supplement (https://acs.figshare.com/ndownloader/files/5169085)

**Synthesis of Quinolines, 2-Quinolones, Phenanthridines and  
6(5*H*)-Phenanthridinones via Palladium[0]-Mediated Ullmann Cross-Coupling of  
1-Bromo-2-nitroarenes with  $\beta$ -Halo-enals, -enones or -esters\***

Martin G. Banwell, David W. Lupton, Xinghua Ma, Jens Renner and Magne O. Sydnes

Research School of Chemistry, Institute of Advanced Studies,  
The Australian National University, Canberra, ACT 0200, Australia

*mgb@rsc.anu.edu.au*

| Contents                                                                                                                                                        | Page    |
|-----------------------------------------------------------------------------------------------------------------------------------------------------------------|---------|
| General                                                                                                                                                         | S2      |
| Experimental Procedures and Product Characterization for<br>Compounds: <b>7–8</b>                                                                               | S3      |
| <b>10–11</b>                                                                                                                                                    | S3–S4   |
| <b>13–14</b>                                                                                                                                                    | S4–S5   |
| <b>16–19</b>                                                                                                                                                    | S5–S6   |
| <b>21–22</b>                                                                                                                                                    | S6–S7   |
| <b>24–27</b>                                                                                                                                                    | S7–S8   |
| <b>29–32</b>                                                                                                                                                    | S8–S9   |
| <b>34–35</b>                                                                                                                                                    | S9–S10  |
| <b>37–38</b>                                                                                                                                                    | S10–S11 |
| <b>40–41</b>                                                                                                                                                    | S11–S12 |
| <b>43–44</b>                                                                                                                                                    | S12–S13 |
| <b>46–47</b>                                                                                                                                                    | S13–S14 |
| <b>49–50</b>                                                                                                                                                    | S14–S15 |
| <b>52–53</b>                                                                                                                                                    | S15     |
| <b>55–56</b>                                                                                                                                                    | S16     |
| <b>58–59</b>                                                                                                                                                    | S16–S17 |
| References                                                                                                                                                      | S18     |
| <sup>1</sup> H or <sup>13</sup> C NMR Spectra of Compounds: <b>7, 10, 13, 16, 18, 21,<br/>23, 24, 26, 29, 31, 37, 38, 40, 41, 43, 46, 49, 52, 55, 56 and 58</b> | S19–S40 |

\* The work described here-in is the subject of a patent application submitted to IPAustralia on 17 May 2004.

## Experimental Procedures and Product Characterization

### General Experimental:

Melting points were measured on a Reichert hot-stage microscope apparatus and are uncorrected. Proton ( $^1\text{H}$ ) and carbon ( $^{13}\text{C}$ ) NMR spectra were recorded on a Varian Inova 500 spectrometer operating at 500 MHz for proton and 126 MHz for carbon. In certain cases a Gemini 300 NMR spectrometer, operating at 300 MHz (for proton) and 75 MHz (for carbon), was employed. Spectra were acquired at 20°C in deuteriochloroform ( $\text{CDCl}_3$ ) which had been filtered through basic alumina prior to use, or deuteromethanol ( $\text{CD}_3\text{OD}$ ), deuterium oxide ( $\text{D}_2\text{O}$ ) or deuterodimethyl sulfoxide [ $(\text{CD}_3)_2\text{SO}$ ]. Signals arising from the residual protio-forms of the solvent were used as the internal standard. Chemical shifts were recorded as  $\delta$  values in parts per million (ppm). The assignments of signals observed in the various NMR spectra were often assisted by conducting DEPT, APT, homonuclear ( $^1\text{H}/^1\text{H}$ ) correlation spectroscopy (gDQFCOSY), and/or heteronuclear ( $^1\text{H}/^{13}\text{C}$ ) correlation spectroscopy (gHMQC or gHMBC) experiments. Infrared spectra ( $\nu_{\text{max}}$ ) were recorded on a Perkin–Elmer 1800 Series FTIR Spectrometer. Samples were analysed as KBr disks (for solids) or as thin films on NaCl plates (for oils). Low resolution mass spectra were recorded on a Micromass–Waters LC-ZMD single quadrupole liquid chromatograph-MS or VG Quattro II triple quadrupole MS instrument using electrospray techniques in positive and/or negative ionization mode. Low resolution EI and FAB mass spectra were recorded on an AUTOSPEC spectrometer or a Kratos Analytical Concept ISQ instrument, the latter being located at the University of Tasmania. High resolution mass spectra were acquired by FAB methods on a Thermoquest Mat95XL instrument (located at CSIRO Molecular Science, Melbourne) or by EI methods on an AUTOSPEC instrument. Optical rotations were measured with a Perkin–Elmer 241 polarimeter at the sodium-D line (589 nm) and the concentrations ( $c$ ) (g/100 mL) indicated using spectroscopic grade  $\text{CHCl}_3$  unless otherwise specified. The measurements were carried out in a cell with a path length ( $l$ ) of 1 dm. Specific rotations  $[\alpha]_D$  were calculated using the equation  $[\alpha]_D = 100.\alpha/(c.l)$  and are given in  $10^{-1}.\text{deg.cm}^2.\text{g}^{-1}$ . Elemental analyses were performed by the Australian National University's Microanalytical Services Unit based at the Research School of Chemistry, Canberra, Australia. The unit cell parameters were recorded on a Nonius Kappa CCD instrument. Dichloromethane and chloroform were distilled from calcium hydride and THF and benzene were distilled, under nitrogen, from sodium benzophenone ketyl. Where necessary, reactions were performed under a nitrogen atmosphere.

**(Z)- $\beta$ -(2'-Nitrophenyl)cinnamaldehyde (7).** A solution of 1-bromo-2-nitrobenzene (**1**, R=H) (396 mg, 2 mmol) and (Z)- $\beta$ -bromocinnamaldehyde (**6**)<sup>1</sup> (420 mg, 2 mmol) in DMSO (6 mL) was treated with Pd<sub>2</sub>(dba)<sub>3</sub> (60 mg, 3 mol%) and copper powder (630 mg, 0.01 g.-atom). The ensuing mixture was heated at 80 °C (oil bath) with vigorous stirring for 2 h then cooled and diluted with diethyl ether (50 mL). The resulting mixture was filtered through a pad of Celite™ and the solids thus retained were washed with diethyl ether (5 × 10 mL). The combined filtrates were washed with water (3 × 20 mL) and brine (1 × 30 mL) then dried (MgSO<sub>4</sub>), filtered and concentrated under reduced pressure to give a yellow oil. Subjection of this material to flash chromatography (4:1 v/v hexane-ethyl acetate elution) and concentration of the appropriate fractions (*R<sub>f</sub>* = 0.2) afforded compound **7** (310 mg, 68%) as a yellow crystalline solid, mp = 114–121 °C. <sup>1</sup>H NMR (CDCl<sub>3</sub>, 300 MHz)  $\delta$  9.42 (d, *J* = 8.1 Hz, 1H), 8.22 (dd, *J* = 1.5 and 8.1 Hz, 1H), 7.78 (dt, *J* = 1.2 and 7.2 Hz, 1H), 7.68 (dt, *J* = 1.5 and 8.1 Hz, 1H), 7.48 (dd, *J* = 1.5 and 7.5 Hz, 1H), 7.26–7.39 (m, 5H), 6.70 (d, *J* = 8.1 Hz, 1H); <sup>13</sup>C NMR (CDCl<sub>3</sub>, 75 MHz)  $\delta$  191.5, 158.4, 148.1, 137.1, 133.5, 133.1, 131.9, 130.8, 130.3, 128.8, 127.2, 126.8, 125.3; IR  $\nu_{\text{max}}$  (KBr) 3063, 2847, 2753, 1670, 1595, 1572, 1526, 1447, 1346, 1234, 1132, 1077, 855 cm<sup>-1</sup>; MS, *m/z* (EI, 70eV) 253 (M<sup>+</sup>, 13%), 233 (4), 224 (100), 196 (92), 180 (55), 178 (53), 167 (50), 165 (47), 152 (42), 77 (52); HRMS, Found: M<sup>+</sup>, 253.0741 C<sub>15</sub>H<sub>11</sub>NO<sub>3</sub> requires M<sup>+</sup>, 253.0739.

**4-Phenylquinoline (8).** Commercially available titanium(III) chloride tetrahydrofuran complex (1.68 g, 4 mmol) was dissolved in water (3 mL) then ammonium acetate (6 mL of a 2.5 M aqueous solution) and acetone (3 mL) were added. The resulting dark-blue and biphasic mixture was stirred at 18 °C for 10 minutes then a solution of compound **7** (127 mg, 0.5 mmol) in acetone (6 mL) was added dropwise. After 0.25 h the now pale-blue reaction mixture was diluted with water (100 mL) and extracted with ethyl acetate (3 × 75 mL). The combined extracts were washed with sodium bicarbonate (3 × 75 mL of a saturated aqueous solution) then brine (3 × 75 mL) before being dried (MgSO<sub>4</sub>), filtered and concentrated under reduced pressure to give a light-yellow oil. Subjection of this material to flash chromatography (80:20:1 v/v/v hexane-ethyl acetate-triethylamine elution) and concentration of the appropriate fractions (*R<sub>f</sub>* = 0.2) afforded compound **8**<sup>2</sup> (51%) as an opaque oil (lit.<sup>2</sup> mp = 61–62 °C). <sup>1</sup>H NMR (CDCl<sub>3</sub>, 300 MHz)  $\delta$  8.94 (d, *J* = 4.5 Hz, 1H), 8.18 (dd, *J* = 1.2 and 8.7 Hz, 1H), 7.92 (d, *J* = 7.8 Hz, 1H), 7.72 (ddd, *J* = 1.2, 6.9 and 9.9 Hz, 1H), 7.54–7.46 (m, 6H), 7.34 (d, *J* = 4.5 Hz, 1H); <sup>13</sup>C NMR (CDCl<sub>3</sub>, 75 MHz)  $\delta$  149.9, 148.6, 148.5, 137.9, 129.8, 129.5, 129.3, 128.5, 128.4, 126.6, 125.8, 121.3, 125.3; IR  $\nu_{\text{max}}$  (KBr) 3058, 1584, 1508, 1490, 1444, 1418, 1389, 850, 768, 698, 611 cm<sup>-1</sup>; MS, *m/z* (EI, 70eV) 205 (M<sup>+</sup>, 100%), 204 (93), 176 (28), 102 (23), 88 (15).

**2-(2'-Nitrophenyl)cyclopent-1-enecarbaldehyde (10).** Cross-coupling of 1-bromo-2-nitrobenzene (**1**, R=H) with 2-bromocyclopent-1-enecarboxaldehyde (**9**)<sup>1</sup> in the same manner as described above for the preparation of compound **7** gave an oily solid on work-up. Subjection of this material to flash

chromatography (4:1 v/v hexane-ethyl acetate elution) and concentration of the appropriate fractions ( $R_f = 0.3$ ) afforded compound **10** (82%) as a yellow crystalline solid, mp = 105–115 °C.  $^1\text{H}$  NMR ( $\text{CDCl}_3$ , 300 MHz)  $\delta$  9.45 (s, 1H), 8.13 (dd,  $J = 1.2$  and 8.1 Hz, 1H), 7.67 (dt,  $J = 1.5$  and 7.5 Hz, 1H), 7.56 (dt,  $J = 1.2$  and 7.5 Hz, 1H), 7.32 (dd,  $J = 1.5$  and 7.5 Hz, 1H), 2.85 (broad t,  $J = 7.5$  Hz, 2H), 2.71 (tt,  $J = 2.1$  and 7.5 Hz, 2H), 2.07 (p,  $J = 7.5$  Hz, 2H);  $^{13}\text{C}$  NMR ( $\text{CDCl}_3$ , 75 MHz)  $\delta$  188.5, 160.1, 147.5, 141.0, 133.4, 131.2(0), 131.1(8), 129.5, 125.0, 40.2, 30.1, 22.4; IR  $\nu_{\text{max}}$  (neat) 2949, 2855, 1671, 1602, 1570, 1526, 1346, 1302, 1237, 847, 789, 746  $\text{cm}^{-1}$ ; MS,  $m/z$  (EI, 70eV) 218 ( $\text{M}^+$ , 37%), 188 (10), 131 (20), 89 (100), 88 (57), 73 (46), 70 (69), 61 (86); HRMS, Found:  $(\text{M}+\text{H})^+$ , 218.0814.  $\text{C}_{12}\text{H}_{11}\text{NO}_3$  requires  $(\text{M}+\text{H})^+$ , 218.0817.

**2,3-Dihydro-1H-cyclopenta[*c*]quinoline (11).** A magnetically stirred solution of compound **10** (100 mg, 0.46 mmol) in methanol (20 mL) maintained at 18 °C was treated with 10% palladium on carbon (23 mg) and the resulting mixture exposed to an atmosphere of dihydrogen (1 atm.) while being protected from light. After 10 h the reaction mixture was filtered through a pad of Celite™ and the solids thus retained washed with methanol (20 mL). The combined filtrates were concentrated under reduced pressure to give a light-yellow oil. Subjection of this material to flash chromatography (80:20:1 v/v hexane-ethyl acetate-triethylamine elution) and concentration of the appropriate fractions ( $R_f = 0.3$ ) afforded compound **11**<sup>3</sup> (92%) as a pale-yellow crystalline solid, mp = 45–52 °C (lit.<sup>3</sup> mp = 58–59 °C).  $^1\text{H}$  NMR ( $\text{CDCl}_3$ , 300 MHz)  $\delta$  8.80 (s, 1H), 8.10 (d,  $J = 8.4$  Hz, 1H), 7.76 (broad d,  $J = 7.8$  Hz, 1H), 7.63 (broad t,  $J = 8.4$  Hz, 1H), 7.50 (broad t,  $J = 7.8$  Hz, 1H), 3.23 (t,  $J = 7.5$  Hz, 2H), 3.10 (t,  $J = 7.5$  Hz, 2H), 2.50 (p,  $J = 7.5$  Hz, 2H);  $^{13}\text{C}$  NMR ( $\text{CDCl}_3$ , 75 MHz)  $\delta$  149.9, 147.6, 146.7, 136.6, 129.5, 128.2, 126.3, 126.0, 124.1, 31.2, 30.8, 24.3; IR  $\nu_{\text{max}}$  (KBr) 3298, 2937, 2856, 1646, 1587, 1568, 1508, 1461, 1435, 1402, 1310, 1295, 1152, 1141, 756  $\text{cm}^{-1}$ ; MS,  $m/z$  (EI, 70eV) 169 ( $\text{M}^+$ , 40%), 168 (35), 167 (10), 115 (12), 65 (30), 63 (100), 62 (42), 58 (50); HRMS, Found:  $\text{M}^+$ , 169.0888.  $\text{C}_{12}\text{H}_{11}\text{N}$  requires  $\text{M}^+$ , 169.0891.

**2-(2'-Nitrophenyl)cyclohex-1-enecarbaldehyde (13).** Cross-coupling of 1-bromo-2-nitrobenzene (**1**, R=H) with 2-bromocyclohex-1-enecarboxaldehyde (**12**)<sup>1</sup> in the same manner as described above for the preparation of compound **7** gave an oily solid on work-up. Subjection of this material to flash chromatography (9:1 v/v hexane-ethyl acetate elution) and concentration of the appropriate fractions ( $R_f = 0.2$ ) afforded compound **13** (82%) as a yellow crystalline solid, mp = 55–58 °C.  $^1\text{H}$  NMR ( $\text{CDCl}_3$ , 300 MHz)  $\delta$  9.22 (s, 1H), 8.08 (dd,  $J = 1.2$  and 8.1 Hz, 1H), 7.62 (dt,  $J = 1.2$  and 7.5 Hz, 1H), 7.50 (dt,  $J = 1.2$  and 8.1 Hz, 1H), 7.28 (dd,  $J = 1.2$  and 7.5 Hz, 1H), 2.50 (m, 1H), 2.42–2.16 (complex m, 3H), 1.84–1.70 (complex m, 3H), 1.60 (m, 1H);  $^{13}\text{C}$  NMR ( $\text{CDCl}_3$ , 75 MHz)  $\delta$  191.3, 156.3, 147.2, 135.4, 135.1, 133.3, 131.0, 129.0, 124.8, 33.6, 22.1, 21.7, 21.0; IR  $\nu_{\text{max}}$  (neat) 2931, 2867, 1670, 1630, 1606, 1570, 1522, 1345, 1273, 1212, 980, 855, 787, 747  $\text{cm}^{-1}$ ; MS,  $m/z$  (EI, 70eV) 232 [ $(\text{M}+\text{H})^+$ , 1%], 202 (40), 186 (32), 174 (35), 158 (100), 146 (55), 144 (39), 132 (97), 130 (95), 128 (65), 115 (80), 91 (58), 77 (75); HRMS, Found:  $(\text{M}+\text{H})^+$ , 232.0972  $\text{C}_{13}\text{H}_{13}\text{NO}_3$  requires  $(\text{M}+\text{H})^+$ , 232.0974.

**7,8,9,10-Tetrahydrophenanthridine (14).** Reductive cyclization of compound **13** in the same manner as described above for the preparation of compound **11** afforded a light-yellow oil on work-up. Subjection of this material to flash chromatography (80:20:1 v/v/v hexane-ethyl acetate-triethylamine elution) and concentration of the appropriate fractions ( $R_f = 0.15$ ) afforded compound **14**<sup>2</sup> (82%) as a pale-yellow crystalline solid, mp = 52–58 °C (lit.<sup>2</sup> mp = 61–62 °C). <sup>1</sup>H NMR (CDCl<sub>3</sub>, 300 MHz) δ 8.62 (s, 1H), 8.06 (d,  $J = 8.4$  Hz, 1H), 7.92 (d,  $J = 8.4$  Hz, 1H), 7.63 (t,  $J = 8.4$  Hz, 1H), 7.53 (t,  $J = 8.4$  Hz, 1H), 3.11 (t,  $J = 6.3$  Hz, 2H), 2.90 (t,  $J = 6.3$  Hz, 2H), 1.93 (m, 4H); <sup>13</sup>C NMR (CDCl<sub>3</sub>, 75 MHz) δ 152.3, 146.2, 141.4, 129.7, 129.6, 128.0, 127.6, 126.3, 122.6, 27.1, 24.9, 22.4, 22.3; IR  $\nu_{\max}$  (KBr) 2932, 1714, 1591, 1573, 1505, 1434, 1387, 1337, 1216, 1162, 1127, 909, 755 cm<sup>-1</sup>; MS,  $m/z$  (EI, 70eV) 183 (M<sup>+</sup>, 100%), 182 (75), 168 (39), 167 (42), 155 (75), 154 (50), 115 (35).

**2-(2'-Nitrophenyl)cyclohept-1-enecarbaldehyde (16).** Cross-coupling of 1-bromo-2-nitrobenzene (**1**, R=H) with 2-bromocyclohept-1-enecarboxaldehyde (**15**)<sup>1</sup> in the same manner as described above for the preparation of compound **7** gave yellow solid on work-up. Subjection of this material to flash chromatography (4:1 v/v hexane-ethyl acetate elution) and concentration of the appropriate fractions ( $R_f = 0.35$ ) afforded compound **16** (75%) as a yellow crystalline solid, mp = 98–102 °C. <sup>1</sup>H NMR (CDCl<sub>3</sub>, 300 MHz) δ 9.21 (s, 1H), 8.15 (dd,  $J = 1.5$  and 8.1 Hz, 1H), 7.63 (dt,  $J = 1.5$  and 7.5 Hz, 1H), 7.53 (dt,  $J = 1.5$  and 7.5 Hz, 1H), 7.24 (dd,  $J = 1.5$  and 7.5 Hz, 1H), 2.93–2.77 (m, 2H), 2.40 (m, 2H), 1.99–1.68 (complex m, 4H), 1.58–1.30 (complex m, 2H); <sup>13</sup>C NMR (CDCl<sub>3</sub>, 75 MHz) δ 191.0, 162.4, 146.5, 141.3, 136.6, 133.4, 131.4, 129.1, 125.1, 38.4, 31.9, 25.7, 25.4, 24.0; IR  $\nu_{\max}$  (KBr) 2924, 2852, 1671, 1623, 1605, 1570, 1526, 1449, 1344, 749 cm<sup>-1</sup>; MS,  $m/z$  (EI, 70eV) 245 (M<sup>+</sup>, 10%), 216 (40), 197 (38), 172 (100), 146 (90), 132 (95), 130 (91), 115 (81), 77 (84); HRMS, Found: M<sup>+</sup>, 245.1046 C<sub>14</sub>H<sub>15</sub>NO<sub>3</sub> requires M<sup>+</sup>, 245.1052.

**8,9,10,11-Tetrahydro-7H-cyclohepta[c]quinoline (17).** Reductive cyclization of compound **16** in the same manner as described above for the preparation of compound **11** afforded a light-yellow oil on work-up. Subjection of this material to flash chromatography (70:30:1 v/v hexane-ethyl acetate-triethylamine elution) and concentration of the appropriate fractions ( $R_f = 0.35$ ) afforded compound **17**<sup>4</sup> (84%) as an orange crystalline solid, mp = 65–67 °C (lit.<sup>4</sup> mp = 67 °C). <sup>1</sup>H NMR (CDCl<sub>3</sub>, 300 MHz) δ 8.78 (d,  $J = 9.3$  Hz, 1H), 8.40 (s, 1H), 8.07 (d,  $J = 9.3$  Hz, 1H), 7.62–7.56 (complex m, 2H), 3.18 (m, 2H), 2.87 (m, 2H), 1.02 (m, 2H), 1.69 (m, 4H); <sup>13</sup>C NMR (CDCl<sub>3</sub>, 75 MHz) δ 139.5, 136.3(4), 136.2(6), 128.9, 128.7, 128.2, 123.8, 120.1, 33.2, 31.9, 27.7, 27.0, 26.3; IR  $\nu_{\max}$  (KBr) 2923, 2852, 1627, 1387, 1307, 1187, 1146, 1083, 960, 761 cm<sup>-1</sup>; MS,  $m/z$  (EI, 70eV) 197 (M<sup>+</sup>, 100%), 168 (55), 155 (40), 86 (72), 84 (90), 75 (45).

**2-(4'-Methoxy-2'-nitrophenyl)cyclohex-1-enecarbaldehyde (18).** Cross-coupling of 1-bromo-4-methoxy-2-nitrobenzene (**1**, R=OMe) with 2-bromocyclohex-1-enecarbox-aldehyde (**12**)<sup>1</sup> in the same manner as described above for the preparation of compound **7** gave a yellow oil on work-up. Subjection of

this material to flash chromatography (7:3 v/v hexane-ethyl acetate elution) and concentration of the appropriate fractions ( $R_f$  0.35) afforded compound **18** (88%) as a yellow oil.  $^1\text{H}$  NMR ( $\text{CDCl}_3$ , 300 MHz)  $\delta$  9.26 (s, 1H), 7.59 (m, 1H), 7.15 (m, 2H), 3.86 (s, 3H), 2.50–2.21 (complex m, 4H), 1.81–1.57 (complex m, 4H);  $^{13}\text{C}$  NMR ( $\text{CDCl}_3$ , 75 MHz)  $\delta$  191.6, 159.6, 156.4, 147.9, 135.8, 131.9, 127.1, 119.8, 109.5, 55.8, 33.8, 22.2, 21.9, 21.1; IR  $\nu_{\text{max}}$  (KBr) 2937, 2841, 1673, 1631, 1563, 1531, 1460, 1349, 1302, 1035, 1275, 1255, 1224, 799  $\text{cm}^{-1}$ ; MS,  $m/z$  (EI, 70eV) 261 ( $\text{M}^+$ , 1%), 232 (40), 216 (45), 215 (60), 204 (45), 188 (100), 176 (57), 162 (85), 160 (75), 115 (60), 77 (47); HRMS, Found:  $\text{M}^+$ , 261.0997  $\text{C}_{14}\text{H}_{15}\text{NO}_4$  requires  $\text{M}^+$ , 261.1001.

**3-Methoxy-7,8,9,10-tetrahydrophenanthridine (19).** Reductive cyclization of compound **18** in the same manner as described above for the preparation of compound **11** afforded a light-yellow oil on work-up. Subjection of this material to flash chromatography (75:25:1 v/v hexane-ethyl acetate-triethylamine elution) and concentration of the appropriate fractions ( $R_f$  = 0.2) afforded compound **19**<sup>5</sup> (68%) as an orange crystalline solid, mp = 75–78 °C (lit.<sup>5</sup> mp = 53–54.7 °C).  $^1\text{H}$  NMR ( $\text{CDCl}_3$ , 300 MHz)  $\delta$  8.26 (s, 1H), 8.04 (s, 1H), 7.79 (d,  $J$  = 8.7 Hz, 1H), 7.22 (d,  $J$  = 8.7 Hz, 1H), 3.95 (s, 3H), 2.98 (t,  $J$  = 6.3 Hz, 2H), 2.73 (t,  $J$  = 6.3 Hz, 2H), 1.92–1.80 (complex m, 4H);  $^{13}\text{C}$  NMR ( $\text{CDCl}_3$ , 75 MHz)  $\delta$  160.7, 140.5, 136.9, 133.6, 127.9, 124.6, 124.4, 121.1, 98.6, 55.8, 26.7, 24.7, 22.1, 22.0; IR  $\nu_{\text{max}}$  (KBr) 2936, 1625, 1589, 1573, 1512, 1421, 1392, 1281, 1232, 1178, 1029, 733  $\text{cm}^{-1}$ ; MS,  $m/z$  (EI, 70eV) 213 ( $\text{M}^+$ , 60%), 200 (25), 199 (25), 185 (35), 115 (25), 86 (77), 84 (100); HRMS, Found:  $\text{M}^+$ , 213.1154.  $\text{C}_{14}\text{H}_{15}\text{NO}$  requires  $\text{M}^+$ , 213.1154.

**(E)-2-(2'-Nitrobenzylidene)cyclohexanone (21).** A magnetically stirred mixture of (E)-2-(bromomethylene)cyclohexanone (**20**)<sup>6</sup> (234 mg, 1.24 mmol) and copper(I) iodide (283 mg, 1.49 mmol) in DMSO (8 mL) maintained at 70 °C was treated with 1-bromo-2-nitrobenzene (**1**, R=H) (500 mg, 2.48 mmol), copper powder (315 mg, 4.96 mmol) and  $\text{PdCl}_2(\text{dppf})_2 \cdot \text{CH}_2\text{Cl}_2$  (25 mg). The resulting mixture was heated at 90 °C (oil bath) for 2 h, cooled to 18 °C and diluted with  $\text{CH}_2\text{Cl}_2$  (60 mL) then ammonium chloride (120 mL of a saturated aqueous solution). The separated organic phase was washed with ammonium chloride (2  $\times$  100 mL of a saturated aqueous solution) then dried ( $\text{MgSO}_4$ ), filtered and concentrated under reduced pressure to give a yellow oil. Subjection of this material to flash chromatography (100:3  $\rightarrow$  100:10 v/v hexane-ethyl acetate gradient elution) and concentration of the appropriate fractions ( $R_f$  = 0.4 in 55:25:10 v/v/v hexane- $\text{CH}_2\text{Cl}_2$ -ethyl acetate) afforded compound **21** (204 mg, 71%) as a light-yellow solid, mp = 102–104 °C.  $^1\text{H}$  NMR ( $\text{CDCl}_3$ , 300 MHz)  $\delta$  8.11 (dd,  $J$  = 1.2 and 8.2 Hz, 1H), 7.63 (dt,  $J$  = 1.2 and 7.7 Hz, 1H), 7.59 (broad s, 1H), 7.49 (dt,  $J$  = 1.2 and 8.2 Hz, 1H), 7.32 (d,  $J$  = 7.7 Hz, 1H), 2.60–2.44 (complex m, 4H), 1.93 (m, 2H), 1.73 (m, 2H);  $^{13}\text{C}$  NMR ( $\text{CDCl}_3$ , 75 MHz)  $\delta$  201.4 (C), 148.3 (C), 138.9 (C), 133.2 (CH), 131.8 (C), 131.3 (CH), 131.2 (CH), 129.0 (CH), 125.0 (CH), 40.7 ( $\text{CH}_2$ ), 28.8 ( $\text{CH}_2$ ), 24.0 ( $\text{CH}_2$ ), 23.8 ( $\text{CH}_2$ ); IR  $\nu_{\text{max}}$  (KBr) 2937, 2864, 1690, 1602, 1524,

1344, 1142, 717  $\text{cm}^{-1}$ ; MS,  $m/z$  (EI, 70eV) 231 ( $\text{M}^+$ , 2%), 215 (8), 199 (44), 185 (25), 120 (65), 119 (100), 92 (50), 77 (27), 55 (35); HRMS, Found:  $\text{M}^+$ , 231.0892.  $\text{C}_{13}\text{H}_{13}\text{NO}_3$  requires  $\text{M}^+$ , 231.0895.

**1,2,3,4-Tetrahydroacridine (22).** Reductive cyclization of compound **21** in the same manner as described above for the preparation of compound **11**, save for running the reaction for only 2 h, afforded a light-yellow oil on work-up. Subjection of this material to flash chromatography (100:5  $\rightarrow$  100:25 v/v hexane-ethyl acetate gradient elution) and concentration of the appropriate fractions ( $R_f = 0.3$  in 55:25:20 v/v/v hexane- $\text{CH}_2\text{Cl}_2$ -ethyl acetate) afforded compound **22**<sup>7</sup> (46%) as a light-yellow solid, mp = 53–55 °C (lit.<sup>7</sup> mp = 55–57 °C).  $^1\text{H}$  NMR ( $\text{CDCl}_3$ , 300 MHz)  $\delta$  7.98 (d,  $J = 8.4$  Hz, 1H), 7.77 (s, 1H), 7.67 (d,  $J = 8.1$  Hz, 1H), 7.59 (dt,  $J = 1.4$  and 8.4 Hz, 1H), 7.41 (t,  $J = 8.1$  Hz, 1H), 3.12 (t,  $J = 6.5$  Hz, 2H), 2.94 (t,  $J = 6.5$  Hz, 2H, 2H), 1.96 (m, 2H), 1.88 (m, 2H);  $^{13}\text{C}$  NMR ( $\text{CDCl}_3$ , 75 MHz)  $\delta$  159.3 (C), 146.6 (C), 135.2 (CH), 131.1 (C), 128.6 (CH), 128.3 (CH), 127.3 (C), 127.0 (CH), 125.7 (CH), 33.6 ( $\text{CH}_2$ ), 29.3 ( $\text{CH}_2$ ), 23.3 ( $\text{CH}_2$ ), 23.0 ( $\text{CH}_2$ ); IR  $\nu_{\text{max}}$  (KBr) 2935, 2858, 1623, 1491, 1437, 1414, 1243, 750  $\text{cm}^{-1}$ ; MS,  $m/z$  (EI, 70eV) 183 ( $\text{M}^+$ , 100%), 182 (79), 168 (41), 154 (37), 115 (19), 77 (14); HRMS, Found:  $\text{M}^+$ , 183.1045.  $\text{C}_{13}\text{H}_{13}\text{N}$  requires  $\text{M}^+$ , 183.1048.

**(E)-2-(2'-Nitrobenzylidene)cycloheptanone (24).** Cross-coupling of 1-bromo-2-nitrobenzene (**1**, R=H) with (E)-2-(bromomethylene)cycloheptanone (**23**)<sup>6</sup> in the same manner as described above for the preparation of compound **21** gave a yellow oil on work-up. Subjection of this material to flash chromatography (100:3  $\rightarrow$  100:6 v/v hexane-ethyl acetate gradient elution) and concentration of the appropriate fractions ( $R_f = 0.4$  in 55:25:10 v/v/v hexane- $\text{CH}_2\text{Cl}_2$ -ethyl acetate) afforded compound **24**<sup>8</sup> (73%) as a yellow crystalline solid, mp = 105–107 °C (lit.<sup>8</sup> mp = 95–97 °C).  $^1\text{H}$  NMR ( $\text{CDCl}_3$ , 300 MHz)  $\delta$  8.12 (dd,  $J = 1.2$  and 8.2 Hz, 1 H), 7.71 (s, 1H), 7.63 (dt,  $J = 1.2$  and 7.7 Hz, 1H), 7.49 (dt,  $J = 1.2$  and 8.2 Hz, 1H), 7.27 (d,  $J = 7.7$  Hz, 1H), 2.71 (m, 2H), 2.40 (m, 2H), 1.76 (m, 4H), 1.62 (m, 2H);  $^{13}\text{C}$  NMR ( $\text{CDCl}_3$ , 75 MHz)  $\delta$  203.6 (C), 148.2 (C), 141.6 (C), 133.4 (CH), 133.0 (CH), 132.8 (C), 131.1 (CH), 128.9 (CH), 125.0 (CH), 43.5 ( $\text{CH}_2$ ), 31.3 ( $\text{CH}_2$ ), 29.9 ( $\text{CH}_2$ ), 28.1 ( $\text{CH}_2$ ), 25.5 ( $\text{CH}_2$ ); IR  $\nu_{\text{max}}$  (KBr) 2933, 2917, 2858, 1682, 1614, 1599, 1523, 1349, 1173, 752  $\text{cm}^{-1}$ ; MS,  $m/z$  (EI, 70eV) 245 ( $\text{M}^+$ , <1%), 213 (6), 199 (27), 120 (96), 119 (100), 92 (57), 77 (30) HRMS, Found:  $\text{M}^+$ , 245.1050.  $\text{C}_{14}\text{H}_{15}\text{NO}_3$  requires:  $\text{M}^+$ , 245.1052.

**7,8,9,10-Tetrahydro-6H-cyclohepta[b]quinoline (25).** A magnetically stirred mixture of compound **24** (310 mg, 1.26 mmol) and 10% Pd on carbon (78 mg) in methanol (2 mL) was exposed to dihydrogen (1 atm.). After stirring at 18 °C for 1 h, the reaction mixture was treated with triethylamine (1 mL) and after a further 5 h filtered through a short pad of Celite™ and the filtrate concentrated under reduced pressure. The ensuing light-yellow was subjected to flash chromatography (100:5  $\rightarrow$  100:20 v/v hexane-ethyl acetate gradient elution) thus affording, after concentration of the appropriate fractions ( $R_f = 0.5$  in 55:25:20 v/v/v hexane- $\text{CH}_2\text{Cl}_2$ -ethyl acetate), compound **25**<sup>9</sup> (152 mg, 61%) as a white crystalline solid,

mp = 90–91.5 °C (lit.<sup>9</sup> mp = 91–92 °C). <sup>1</sup>H NMR (CDCl<sub>3</sub>, 300 MHz) δ 8.00 (d, *J* = 8.4 Hz, 1H), 7.79 (s, 1H), 7.70 (dd, *J* = 1.3 and 8.2 Hz, 1H), 7.61 (m, 1H), 7.44 (m, 1H), 3.21 (m, 2H), 2.93 (m, 2H), 1.88 (m, 2H), 1.75 (m, 4H); <sup>13</sup>C NMR (CDCl<sub>3</sub>, 75 MHz) δ 164.8 (C), 146.2 (C), 136.6 (C), 134.8 (CH), 128.6 (CH), 128.5 (CH), 127.5 (C), 126.9 (CH), 125.9 (CH), 40.1 (CH<sub>2</sub>), 35.6 (CH<sub>2</sub>), 32.3 (CH<sub>2</sub>), 29.0 (CH<sub>2</sub>), 27.1 (CH<sub>2</sub>); IR ν<sub>max</sub> (KBr) 2924, 2850, 1491, 1448, 1420, 1340, 750 cm<sup>-1</sup>; MS, *m/z* (EI, 70eV) 197 (M<sup>+</sup>, 100%), 196 (56), 182 (41), 168 (59), 115 (17); HRMS, Found: M<sup>+</sup>, 197.1202. C<sub>14</sub>H<sub>15</sub>N requires: M<sup>+</sup>, 197.1205.

**2-(4'-Methoxy-2'-nitrobenzylidene)cyclohexanone (26).** Cross-coupling of 1-bromo-4-methoxy-2-nitrobenzene (**1**, R=OMe) with (*E*)-2-(bromomethylene)cyclohexanone (**20**)<sup>6</sup> in the same manner as described above for the preparation of compound **21** gave a yellow oil on work-up. Subjection of this material to flash chromatography (100:3 → 100:5 v/v hexane-ethyl acetate gradient elution) and concentration of the appropriate fractions (*R*<sub>f</sub> = 0.3 in 55:25:10 v/v/v hexane-CH<sub>2</sub>Cl<sub>2</sub>-ethyl acetate) afforded compound **26** (75%) as a light-yellow solid, mp = 90–92 °C. <sup>1</sup>H NMR (CDCl<sub>3</sub>, 300 MHz) δ 7.61 (d, *J* = 2.6 Hz, 1H), 7.52 (m, 1H), 7.24 (d, *J* = 9.6 Hz, 1H), 7.15 (dd, *J* = 2.6 and 9.6 Hz, 1H), 3.89 (s, 3H), 2.55 (m, 4H), 1.92 (m, 2H), 1.73 (m, 2H); <sup>13</sup>C NMR (CDCl<sub>3</sub>, 75 MHz) δ 201.6 (C), 159.8 (C), 149.3 (C), 138.3 (C), 132.4 (CH), 131.2 (CH), 123.8 (C), 119.7 (CH), 109.6 (CH), 56.1 (CH<sub>3</sub>), 40.7 (CH<sub>2</sub>), 28.9 (CH<sub>2</sub>), 24.1 (CH<sub>2</sub>), 23.9 (CH<sub>2</sub>); IR ν<sub>max</sub> (KBr) 2942, 2867, 1686, 1619, 1529, 1345, 1250, 1141, 1033 cm<sup>-1</sup>; MS, *m/z* (EI, 70eV) 261 (M<sup>+</sup>, <1%), 229 (7), 215 (37), 150 (59), 149 (100), 122 (22), 77 (14), 55 (21); HRMS, Found: M<sup>+</sup>, 261.1010. C<sub>14</sub>H<sub>15</sub>NO<sub>4</sub> requires: M<sup>+</sup>, 261.1001.

**1,2,3,4-Tetrahydro-6-methoxyacridine (27).** Reductive cyclization of compound **26** in the same manner as described above for the preparation of compound **25** afforded a light-solid on work-up. Subjection of this material to flash chromatography (100:30 v/v hexane-ethyl acetate elution) and concentration of the appropriate fractions (*R*<sub>f</sub> = 0.5 in 40:25:55 v/v/v ethyl acetate-CH<sub>2</sub>Cl<sub>2</sub>-hexane) afforded compound **27**<sup>10</sup> (51%) as a light-yellow crystalline solid, mp = 51–52 °C (lit.<sup>10</sup> mp = 58–59 °C). <sup>1</sup>H NMR (CDCl<sub>3</sub>, 300 MHz) δ 7.70 (s, 1H), 7.55 (d, *J* = 8.9 Hz, 1H), 7.31 (d, *J* = 2.5 Hz, 1H), 7.08 (dd, *J* = 2.5 and 8.9 Hz, 1H), 3.91 (s, 3H), 3.08 (t, *J* = 6.5 Hz, 2H), 2.91 (t, *J* = 6.3 Hz, 2H), 1.96 (m, 2H), 1.86 (m, 2H); <sup>13</sup>C NMR (CDCl<sub>3</sub>, 75 MHz) δ 160.2 (C), 159.3 (C), 148.1 (C), 135.1 (CH), 128.7 (C), 128.0 (CH), 122.5 (C), 118.9 (CH), 106.3 (CH), 55.5 (CH<sub>3</sub>), 33.5 (CH<sub>2</sub>), 29.8 (CH<sub>2</sub>), 23.3 (CH<sub>2</sub>), 23.1 (CH<sub>2</sub>); IR ν<sub>max</sub> (KBr) 2933, 2858, 1626, 1498, 1454, 1239, 1031, 732 cm<sup>-1</sup>; MS, *m/z* (EI, 70eV) 213 (M<sup>+</sup>, 100%), 212 (44), 198 (39), 185 (24), 170 (18), 115 (12); HRMS, Found: M<sup>+</sup>, 213.1151. C<sub>14</sub>H<sub>15</sub>NO requires: M<sup>+</sup>, 213.1154.

**1-(2'-Nitrophenyl)-3,4-dihydronaphthalene-2-carbaldehyde (29).** Cross-coupling of 1-bromo-2-nitrobenzene (**1**, R=H) with aldehyde **28**<sup>11</sup> in the same manner as described above for the preparation of compound **7** gave an oily solid on work-up. Subjection of this material to flash chromatography (3:1 v/v



hexane-ethyl acetate elution) and concentration of the appropriate fractions ( $R_f = 0.4$ ) afforded compound **29** (93%) as a yellow powder, mp = 118 °C.  $^1\text{H}$  NMR ( $\text{CDCl}_3$ , 300 MHz)  $\delta$  9.49 (s, 1H), 8.26 (ddd,  $J = 0.6, 1.2$  and 8.1 Hz, 1H), 7.77 (dt,  $J = 1.5$  and 7.5 Hz, 1H), 7.68 (m, 1H), 7.44 (dd,  $J = 1.5$  and 7.5 Hz, 1H), 7.29 (complex m, 1H), 7.28 (d,  $J = 0.9$  Hz, 1H), 7.08 (m, 1H), 6.59 (d,  $J = 7.5$  Hz, 1H), 3.10–2.83 (complex m, 3H), 2.61–2.49 (complex m, 1H);  $^{13}\text{C}$  NMR ( $\text{CDCl}_3$ , 75 MHz)  $\delta$  191.3, 151.1, 148.7, 138.4, 134.2, 133.8, 133.4, 133.1, 131.2, 130.5, 129.9, 128.1, 126.8, 126.3, 125.2, 27.2, 20.0; IR  $\nu_{\text{max}}$  (NaCl) 2848, 1665, 1525, 1345, 855, 777, 721  $\text{cm}^{-1}$ ; MS,  $m/z$  (EI, 70eV) 279 ( $\text{M}^+$ , 9%), 250 (76), 231 (36), 217 (25), 206 (100), 202 (89), 189 (22), 180 (36), 165 (22), 101 (24); HRMS, Found:  $\text{M}^+$ , 279.0895.  $\text{C}_{17}\text{H}_{13}\text{NO}_3$  requires  $\text{M}^+$ , 279.0895.

**7,8-Dihydrobenzo[*k*]phenanthridine (30).** Reductive cyclization of compound **29** in the same manner as described above for the preparation of compound **11** afforded a light-yellow oil on work-up. Subjection of this material to flash chromatography (47:47:6 v/v/v hexane-ethyl acetate-triethylamine elution) and concentration of the appropriate fractions ( $R_f = 0.4$ ) afforded compound **30**<sup>11</sup> (87%) as a light-yellow oil.  $^1\text{H}$  NMR ( $\text{CDCl}_3$ , 300 MHz)  $\delta$  8.83 (s, 1H), 8.51 (d,  $J = 8.4$  Hz, 1H), 8.15 (dd,  $J = 0.9$  and 8.4 Hz, 1H), 8.01–7.98 (complex m, 1H), 7.69 (two overlapping dd,  $J = 1.2$  and 6.9 Hz, 1H), 7.57 (two overlapping dd,  $J = 1.4$  and 6.9 Hz, 1H), 7.45–7.38 (complex m, 3H), 2.96–2.85 (complex m, 4H); IR  $\nu_{\text{max}}$  ( $\text{CH}_2\text{Cl}_2$ ) 1651, 1607, 1569, 1558, 1505, 1487  $\text{cm}^{-1}$ ; MS,  $m/z$  (EI, 70eV) 231 ( $\text{M}^+$ , 100%), 230 (78), 202 (37), 101 (24).

**1-(4'-Methoxy-2'-nitrophenyl)-3,4-dihydronaphthalene-2-carbaldehyde (31).** Cross-coupling of 1-bromo-4-methoxy-2-nitrobenzene (**1**, R=OMe) with aldehyde **28**<sup>11</sup> in the same manner as described above for the preparation of compound **7** gave a yellow crystalline solid on work-up. Subjection of this material to flash chromatography (4:1 v/v hexane-ethyl acetate elution) and concentration of the appropriate fractions ( $R_f = 0.7$ ) afforded compound **31** (89%) as a yellow crystalline solid, mp = 204 °C.  $^1\text{H}$  NMR ( $\text{CDCl}_3$ , 300 MHz)  $\delta$  9.52 (s, 1H), 7.75 (d,  $J = 2.1$  Hz, 1H), 7.33–7.24 (complex m, 4H), 7.10–7.05 (complex m, 1H), 6.63 (d,  $J = 7.5$  Hz, 1H), 3.96 (s, 3H), 3.07–2.81 (complex m, 3H), 2.58–2.47 (complex m, 1H);  $^{13}\text{C}$  NMR ( $\text{CDCl}_3$ , 75 MHz)  $\delta$  191.6, 160.3, 151.1, 149.4, 138.5, 134.4, 134.2, 133.9, 130.4, 128.0, 126.7, 126.2, 122.9, 119.8, 109.9, 56.0, 27.2, 20.1; IR  $\nu_{\text{max}}$  (NaCl) 2840, 1663, 1531, 1347, 1300, 1031, 775, 736  $\text{cm}^{-1}$ ; MS,  $m/z$  (EI, 70eV) 309 ( $\text{M}^+$ , 14%), 280 (60), 263 (42), 236 (100), 189 (61), 165 (30), 152 (17), 115 (16), 63 (11); HRMS, Found:  $\text{M}^+$ , 309.0999.  $\text{C}_{18}\text{H}_{15}\text{NO}_4$  requires  $\text{M}^+$ , 309.1001.

**3-Methoxy-7,8-dihydrobenzo[*k*]phenanthridine (32).** Reductive cyclization of compound **31** in the same manner as described above for the preparation of compound **11** afforded a light-yellow oil on work-up. Subjection of this material to flash chromatography (47:47:6 v/v/v hexane-ethyl acetate-triethylamine elution) and concentration of the appropriate fractions ( $R_f = 0.2$ ) afforded compound **32** (91%) as a yellow oil.  $^1\text{H}$  NMR ( $\text{CDCl}_3$ , 300 MHz)  $\delta$  8.34 (d,  $J = 9.6$  Hz, 1H), 8.33 (s, 1H), 8.12 (d,  $J = 2.7$  Hz, 1H), 7.79

(d,  $J = 6.6$  Hz, 1H), 7.42–7.34 (complex m, 3H), 7.27 (dd,  $J = 2.7$  and 9.6 Hz, 1H), 4.00 (s, 3H), 2.84–2.69 (complex m, 4H);  $^{13}\text{C}$  NMR ( $\text{CDCl}_3$ , 75 MHz)  $\delta$  160.9, 142.4, 139.6, 135.4, 132.0, 131.2, 129.3, 128.7, 128.6, 128.4, 127.5, 126.7, 121.8, 121.6, 98.4, 55.9, 28.7, 26.5; IR  $\nu_{\text{max}}$  (NaCl) 2927, 1645, 1624, 1481, 1384, 1275, 1225, 1199, 1164, 1026  $\text{cm}^{-1}$ ; MS,  $m/z$  (EI, 70eV) 277 ( $[\text{M}+\text{O}]^+$ , 100%), 261 ( $\text{M}^+$ , 99%), 247 (14), 230 (20), 217 (28), 189 (25); HRMS, Found:  $\text{M}^+$ , 261.1156.  $\text{C}_{18}\text{H}_{15}\text{NO}$  requires  $\text{M}^+$ , 261.1154.

**4,5-Methylenedioxy-2'-nitro-2-biphenylcarbaldehyde (34).** Cross-coupling of 1-bromo-2-nitrobenzene (**1**, R=H) with aldehyde **33** in the same manner as described above for the preparation of compound **7** gave a yellow solid on work-up. Subjection of this material to flash chromatography (4:1 v/v hexane-ethyl acetate elution) and concentration of the appropriate fractions ( $R_f = 0.45$  in 7:3 v/v hexane-ethyl acetate) afforded compound **34**<sup>12</sup> (57%) as a yellow solid, mp = 135–138 °C (lit.<sup>12</sup> mp = 227–228 °C).  $^1\text{H}$  NMR ( $\text{CDCl}_3$ , 300 MHz)  $\delta$  9.57 (s, 1H), 8.07 (dd,  $J = 1.8$  and 7.5 Hz, 1H), 7.67 (dt,  $J = 1.5$  and 7.5 Hz, 1H), 7.60 (dt,  $J = 1.8$  and 7.5 Hz, 1H), 7.45 (s, 1H), 7.37 (dd,  $J = 1.5$  and 7.5 Hz, 1H), 6.67 (s, 1H), 6.12 (m, 2H);  $^{13}\text{C}$  NMR ( $\text{CDCl}_3$ , 75 MHz)  $\delta$  188.8, 152.1, 149.1, 148.4, 137.7, 132.8, 132.6, 129.4, 128.8, 124.4, 109.5, 107.2, 102.4 (one signal obscured or overlapping); IR  $\nu_{\text{max}}$  (KBr) 1678, 1609, 1523, 1476, 1407, 1360, 1349, 1270, 1255, 1230, 1035  $\text{cm}^{-1}$ ; MS,  $m/z$  (EI, 70eV) 271 ( $\text{M}^+$ , 30%), 242 (20), 225 (100), 198 (24), 139 (65); HRMS, Found:  $\text{M}^+$ , 271.0471  $\text{C}_{14}\text{H}_9\text{NO}_5$  requires  $\text{M}^+$ , 271.0481.

**Trispheridine {[1,3]Dioxolo[4,5-*j*]phenanthridine} (35).** Reductive cyclization of compound **34** in the same manner as described above for the preparation of compound **11** afforded compound **35**<sup>13</sup> (68%) as a pale-yellow solid, mp = 111–125 °C, [lit.<sup>13</sup> mp = 144.5–145 °C (sublimation from 119 °C onwards)].  $^1\text{H}$  NMR ( $\text{CDCl}_3$ , 300 MHz)  $\delta$  9.09 (s, 1H), 8.38 (d,  $J = 7.2$  Hz, 1H), 8.14 (d,  $J = 8.7$  Hz, 1H), 7.91 (s, 1H), 7.69 (t,  $J = 8.7$  Hz, 1H), 7.63 (d,  $J = 7.2$  Hz, 1H), 7.34 (s, 1H), 6.17 (s, 2H);  $^{13}\text{C}$  NMR ( $\text{CDCl}_3$ , 75 MHz)  $\delta$  151.7, 151.5, 148.2, 144.0, 130.2, 130.0, 128.0, 126.7, 124.2, 123.0, 122.0, 105.5, 101.9, 99.9; IR  $\nu_{\text{max}}$  (KBr) 2916, 1620, 1583, 1499, 1484, 1464, 1393, 1256, 1226, 1197, 1038, 942, 830, 760  $\text{cm}^{-1}$ ; MS,  $m/z$  (EI, 70eV) 223 ( $\text{M}^+$ , 100%), 164 (12), 138 (20), 111 (10), 86 (42), 84 (57); HRMS, Found:  $\text{M}^+$ , 223.0631  $\text{C}_{14}\text{H}_9\text{NO}_2$  requires  $\text{M}^+$ , 223.0633.

**7-Methoxy-8-(2'-nitrophenyl)-3,4,-dihydro-2H-naphthalen-1-one (37).** A magnetically stirred mixture of 1-bromo-2-nitrobenzene (**1**, R=H) (300 mg, 1.5 mmol),  $\text{Pd}_2(\text{dba})_3$  (25 mg, 5 mol%) and copper powder (160 mg, 2.5 mmol) in DMSO (3 mL) was heated to 80 °C whilst being maintained under a nitrogen atmosphere then a solution of tetralone **36**<sup>14</sup> (125 mg, 0.5 mmol) in DMSO (1 mL) was added *via* syringe pump over a period of 1 h. After addition was complete the reaction mixture was maintained at 80 °C for 4 h. Work-up of the cooled reaction mixture in the same manner as described for the preparation of compound **7** gave a yellow powder. Subjection of this material to flash chromatography (3:2 v/v hexane-ethyl acetate elution) afforded two major fractions, A and B.

Concentration of fraction A ( $R_f = 0.6$ ) afforded a mixture of the desired cross-coupling product and 2,2'-dinitrobiphenyl [product from reductive dimerization of compound (**1** R=H)].

Concentration of fraction B ( $R_f = 0.3$ ) afforded **2,2'-dimethoxy-6,6',7',7'-5H,5'H-[1,1]binaphthalenyl-8,8'-dione** (product from reductive dimerization of compound **36**) (34%) as a white crystalline solid, mp = 178–180 °C.  $^1\text{H}$  NMR ( $\text{CDCl}_3$ , 300 MHz)  $\delta$  7.21 (d,  $J = 8.4$  Hz, 2H), 7.07 (d,  $J = 8.4$  Hz, 2H), 3.63 (s, 6H), 2.96 (complex m, 4H), 2.47 (t,  $J = 6.6$  Hz, 4H), 2.16–1.98 (complex m, 4H);  $^{13}\text{C}$  NMR ( $\text{CDCl}_3$ , 75 MHz)  $\delta$  198.6, 155.0, 136.9, 131.4, 128.8, 128.1, 115.8, 56.4, 40.0, 30.0, 23.2; IR  $\nu_{\text{max}}$  (NaCl) 2923, 2857, 1681, 1483, 1268, 1219, 1189, 1027, 988, 921, 824  $\text{cm}^{-1}$ ; MS,  $m/z$  (EI, 70eV) 350 ( $\text{M}^+$ , 100%), 319 (56), 294 (53), 279 (44), 251 (21), 189 (48), 147 (18); HRMS, Found:  $\text{M}^+$ , 350.1520.  $\text{C}_{22}\text{H}_{22}\text{O}_4$  requires  $\text{M}^+$ , 350.1518.

Subjection of fraction A, obtained as described above, to flash chromatography (4:1 v/v dichloromethane-pentane elution) and concentration of the appropriate fractions ( $R_f = 0.6$ ) afforded compound **37** (53%) as a yellow solid, mp = 204 °C.  $^1\text{H}$  NMR ( $\text{CDCl}_3$ , 300 MHz)  $\delta$  8.16 (dd,  $J = 1.2$  and 8.4 Hz, 1H), 7.59 (dt,  $J = 1.5$  and 7.5 Hz, 1H), 7.47 (dt,  $J = 1.5$  and 7.5 Hz, 1H), 7.30 (d,  $J = 8.4$  Hz, 1H), 7.12 (dd,  $J = 1.5$  and 7.5 Hz, 1H), 7.10 (d,  $J = 8.4$  Hz, 1H), 3.65 (s, 3H), 2.98 (t,  $J = 6.3$  Hz, 2H), 2.53 (t,  $J = 6.1$  Hz, 2H), 2.18–2.00 (complex m, 2H);  $^{13}\text{C}$  NMR ( $\text{CDCl}_3$ , 75 MHz)  $\delta$  198.4, 154.9, 148.0, 137.4, 134.8, 132.8, 131.2, 130.8, 129.6, 128.0, 127.3, 124.2, 115.8, 56.1, 40.0, 29.8, 23.1; IR  $\nu_{\text{max}}$  (NaCl) 2937, 1678, 1520, 1347, 1270, 1028, 936, 854, 788, 754  $\text{cm}^{-1}$ ; MS,  $m/z$  (EI, 70eV) 297 ( $\text{M}^+$ , 1%), 251 (100), 236 (12), 198 (11), 149 (7); HRMS, Found:  $\text{M}^+$ , 297.1012.  $\text{C}_{17}\text{H}_{15}\text{NO}_4$  requires  $\text{M}^+$ , 297.1001.

**5,6-Dihydro-11-Methoxy-4H-benz[*kl*]acridine (38).** Reductive cyclization of compound **37** in the same manner as described above for the preparation of compound **11** afforded a clear colorless oil on work-up. Subjection of this material to flash chromatography (63:31:6 v/v/v hexane-ethyl acetate-triethylamine elution) and concentration of the appropriate fractions ( $R_f = 0.4$ ) afforded compound **38** (92%) as a clear, yellow oil.  $^1\text{H}$  NMR ( $\text{CDCl}_3$ , 300 MHz)  $\delta$  9.45 (d,  $J = 8.4$  Hz, 1H), 8.17 (d,  $J = 8.4$  Hz, 1H), 7.69 (t,  $J = 8.4$  Hz, 1H), 7.58 (t,  $J = 8.4$  Hz, 1H), 7.40 (d,  $J = 8.4$  Hz, 1H), 7.23 (d,  $J = 8.1$  Hz, 1H), 4.09 (s, 3H), 3.36 (t,  $J = 6.0$  Hz, 2H), 3.12 (t,  $J = 6.0$  Hz, 2H), 2.22–2.14 (complex m, 2H);  $^{13}\text{C}$  NMR ( $\text{CDCl}_3$ , 75 MHz)  $\delta$  159.7, 156.3, 143.9, 131.1, 128.7, 127.9, 126.7, 125.8, 124.8, 123.7, 123.0, 111.7, 55.7, 35.7, 30.8, 23.2 (one signal obscured or overlapping); IR  $\nu_{\text{max}}$  (NaCl) 2926, 2855, 1574, 1455, 1435, 1361, 1248, 1122, 1046, 1027, 814, 765  $\text{cm}^{-1}$ ; MS,  $m/z$  (EI, 70eV) 249 ( $\text{M}^+$ , 100%), 234 (45), 206 (19), 204 (22); HRMS, Found:  $\text{M}^+$ , 249.1148.  $\text{C}_{17}\text{H}_{15}\text{NO}$  requires  $\text{M}^+$ , 249.1154.

**3-(2'-Nitrophenyl)-1H-indole-2-carbaldehyde (40).** Cross-coupling of 1-bromo-2-nitrobenzene (**1**, R=H) with aldehyde **39**<sup>15</sup> in the same manner as described above for the preparation of compound **7** gave a yellow powder on work-up. Subjection of this material to flash chromatography (1:1 v/v hexane-ethyl acetate elution) and concentration of the appropriate fractions ( $R_f = 0.7$ ) afforded a mixture of the desired cross-coupling product and 2,2'-dinitrobiphenyl [product from reductive dimerization of compound (**1**

R=H)]. Subjection of this material to flash chromatography (1:1 v/v hexane-diethyl ether elution) and concentration of the appropriate fractions ( $R_f = 0.4$ ) then afforded compound **40** (63%) as a powder solid, mp = 158 °C.  $^1\text{H}$  NMR ( $\text{CDCl}_3$ , 300 MHz)  $\delta$  9.72 (s, 1H), 9.33 (broad s, 1H), 8.11 (dd,  $J = 1.5$  and 7.5 Hz, 1H), 7.74 (dt,  $J = 1.5$  and 7.5 Hz, 1H), 7.65 (dt,  $J = 1.8$  and 8.1 Hz, 1H), 7.58 (dd,  $J = 1.8$  and 7.5 Hz, 1H), 7.48 (t,  $J = 8.4$  Hz, 1H), 7.45–7.38 (complex m, 2H), 7.19–7.13 (complex m, 1H);  $^{13}\text{C}$  NMR ( $\text{CDCl}_3$ , 75 MHz)  $\delta$  181.4, 136.7, 134.2, 132.6, 132.0, 129.4, 127.9, 126.9, 126.5, 124.8(4), 124.8(0), 123.8, 121.9, 121.1, 112.7; IR  $\nu_{\text{max}}$  (NaCl) 1652, 1525, 1349, 1333, 1231, 1231, 1016, 867, 851, 785, 740, 702  $\text{cm}^{-1}$ ; MS,  $m/z$  (EI, 70eV) 266 ( $\text{M}^+$ , 100%), 221 (64), 219 (60), 210 (83), 209 (93), 190 (49), 181 (67), 165 (68), 152 (44), 139 (24), 77 (28), 63 (24); HRMS, Found:  $\text{M}^+$ , 266.0689.  $\text{C}_{15}\text{H}_{10}\text{N}_2\text{O}_3$  requires  $\text{M}^+$ , 266.0691.

**7H-Indolo[2,3-*c*]quinoline (41).** Reductive cyclization of compound **40** in the same manner as described above for the preparation of compound **11** afforded a clear colorless oil on work-up. Subjection of this material to flash chromatography (42:42:8 v/v/v hexane-ethyl acetate-triethylamine elution) and concentration of the appropriate fractions ( $R_f = 0.1$ ) afforded compound **41**<sup>16</sup> (66%) as a yellow powder, mp = 251 °C (lit.<sup>16</sup> mp = 249 °C).  $^1\text{H}$  NMR [ $(\text{CD}_3)_2\text{CO}$ , 300 MHz]  $\delta$  11.24 (broad s, 1H), 9.31 (s, 1H), 8.81 (dd,  $J = 1.2$  and 8.4 Hz, 1H), 8.68 (d,  $J = 8.1$  Hz, 1H), 8.22 (dd,  $J = 1.2$  and 8.1 Hz, 1H), 7.81–7.73 (complex m, 2H), 7.65 (ddd,  $J = 1.5$ , 6.9 and 8.1 Hz, 1H), 7.59 (ddd,  $J = 1.2$ , 7.2 and 8.1 Hz, 1H), 7.42 (ddd,  $J = 1.2$ , 7.2 and 8.1 Hz, 1H);  $^{13}\text{C}$  NMR [ $(\text{CD}_3)_2\text{CO}$ , 75 MHz]  $\delta$  143.9, 140.6, 139.5, 133.9, 131.3, 127.8, 127.5, 126.0, 125.6, 124.1, 123.8, 122.9, 121.3, 121.0, 113.4; IR  $\nu_{\text{max}}$  (KBr disc) 2924, 2853, 1622, 1341, 1137, 1110, 762, 745  $\text{cm}^{-1}$ ; MS,  $m/z$  (EI, 70eV) 218 ( $\text{M}^+$ , 100%), 190 (12), 164 (6), 163 (6), 109 (7); HRMS, Found:  $\text{M}^+$ , 218.0837.  $\text{C}_{15}\text{H}_{10}\text{N}_2$  requires  $\text{M}^+$ , 218.0844.

**2-(2'-Nitrophenyl)cyclohex-1-ene Carboxylic Acid Methyl Ester (43).** Cross-coupling of 1-bromo-2-nitrobenzene (**1**, R=H) with bromo-ester **42**<sup>17</sup> was carried out in the same manner as described above for the preparation of compound **7** save for the use of a reaction temperature of 90 °C and a reaction time of 6 h. The yellow oil obtained on work-up was subjected to flash chromatography (9:1 v/v hexane-ethyl acetate elution) and three fractions, A–C, were obtained.

Concentration of fraction A ( $R_f = 0.4$ ) afforded the starting ester **42** (8% recovery) which was identical, in all respects, with an authentic sample.

Concentration of fraction B ( $R_f = 0.2$ ) afforded 2,2'-dinitrobiphenyl (18% at 92% conversion) which was identical, in all respects, with an authentic sample.

Concentration of fraction C ( $R_f = 0.1$ ) afforded compound **43** (39% at 92% conversion) as a yellow oil.  $^1\text{H}$  NMR ( $\text{CDCl}_3$ , 300 MHz)  $\delta$  8.04 (dd,  $J = 1.2$  and 8.2 Hz, 1H), 7.55 (dt,  $J = 1.2$  and 7.4 Hz, 1H), 7.39 (ddd,  $J = 1.5$ , 7.4 and 8.2 Hz, 1H), 7.10 (dd,  $J = 1.5$  and 7.4 Hz, 1H), 3.38 (s, 3H), 2.60–2.18 (complex m, 4H), 1.86–1.54 (complex m, 4H);  $^{13}\text{C}$  NMR ( $\text{CDCl}_3$ , 126 MHz)  $\delta$  167.6 (CO), 147.0 (C), 146.9 (C), 139.8 (C), 133.2 (CH), 129.0 (CH), 127.5 (CH), 125.8 (C), 124.2 (CH), 51.3 ( $\text{CH}_3$ ), 33.6

(CH<sub>2</sub>), 25.8 (CH<sub>2</sub>), 22.2 (CH<sub>2</sub>), 21.9 (CH<sub>2</sub>); IR  $\nu_{\text{max}}$  (KBr) 2935, 1716, 1524, 1348, 1241, 1052 cm<sup>-1</sup>; MS,  $m/z$  (EI, 70eV) 261 (M<sup>+</sup>, 2%), 243 (40), 215 (78), 202 (70), 146 (100%), 132 (93), 130 (70), 115 (64), 77 (60); HRMS, Found: M<sup>+</sup>, 261.0999. C<sub>14</sub>H<sub>15</sub>NO<sub>4</sub> requires M<sup>+</sup>, 261.1001

**7,8,9,10-Tetrahydro-6(5H)-phenanthridinone (44).** Reductive cyclization of compound **43** was achieved in the same manner as described above for the preparation of compound **11** save for the use of a 1 h reaction time. In this manner a clear, colorless oil was obtained on work-up. Subjection of this material to flash chromatography (95:4.25:0.75 v/v/v dichloromethane-methanol-15% aq. ammonia elution) and concentration of the appropriate fractions ( $R_f$  = 0.15) afforded an orange solid. Recrystallization (from ethyl acetate–hexane) of this material yielded compound **44**<sup>18</sup> (78%) as a white crystalline masses, mp = 263–265 °C (lit.<sup>18</sup> mp = 268–270 °C). <sup>1</sup>H NMR (CD<sub>3</sub>OD, 300 MHz)  $\delta$  7.76 (dd,  $J$  = 0.9 and 8.1 Hz, 1H), 7.46 (m, 1H), 7.33–7.22 (complex m, 2H), 2.93 (m, 2H), 2.58 (m, 2H), 1.95–1.78 (complex m, 4H); <sup>13</sup>C NMR (CD<sub>3</sub>OD, 126 MHz)  $\delta$  164.6 (CO), 146.3 (C), 137.7 (C), 130.4 (CH), 128.8 (C), 124.4 (CH), 123.7 (CH), 121.8 (C), 116.7 (CH), 26.6 (CH<sub>2</sub>), 24.9 (CH<sub>2</sub>), 23.0 (CH<sub>2</sub>), 22.9 (CH<sub>2</sub>); IR  $\nu_{\text{max}}$  (KBr) 2935, 2854, 1648, 1566, 1505, 1437, 746 cm<sup>-1</sup>; MS,  $m/z$  (EI, 70eV) 199 (M<sup>+</sup>, 100%), 198 (73), 184 (67); HRMS, Found: M<sup>+</sup>, 199.0995. C<sub>13</sub>H<sub>13</sub>NO requires M<sup>+</sup>, 199.0997

**2'-Nitro-[1,1'-biphenyl]-2-carboxylic Acid Methyl Ester (46).** Cross-coupling of 1-iodo-2-nitrobenzene with commercially available iodo-ester **45** was carried out in the same manner as described above for the preparation of compound **7** save for the use of a reaction temperature of 90 °C and a reaction time of 2.5 h. The yellow solid obtained on work-up was subjected to flash chromatography (9:1 v/v hexane-ethyl acetate elution) and two fractions, A and B, thereby obtained.

Concentration of fraction A ( $R_f$  = 0.3) afforded 2,2'-dinitrobiphenyl (78%) which was identical, in all respects, with an authentic sample.

Concentration of fraction B ( $R_f$  = 0.2) afforded a *ca.* 1:1 mixture of compound **46** and **[1,1'-biphenyl]-2,2'-dicarboxylic acid dimethyl ester** (product from reductive dimerization of compound **45**) as a yellow oil. This mixture was immediately subject to a reductive cyclization reaction as detailed below.

**6(5H)-phenanthridinone (47).** A *ca.* 1:1 mixture of compound **46** and **[1,1'-biphenyl]-2,2'-dicarboxylic acid dimethyl ester**, obtained as detailed immediately above, was subjected to reductive cyclization in the same manner as described earlier for the preparation of compound **11** save for use of a reaction time of 0.75 h. In this way a clear colorless oil was obtained on work-up. Subjection of this material to flash chromatography (70:27:3 v/v hexane-ethyl acetate-triethylamine elution) afforded two fractions, A and B.

Concentration of fraction A ( $R_f$  = 0.5 in 7:3 v/v hexane-ethyl acetate) afforded pure **[1,1'-biphenyl]-2,2'-dicarboxylic acid dimethyl ester**<sup>19</sup> (40%) as light-pink crystalline masses, mp = 72–73

°C (lit.<sup>19</sup> mp = 73–74 °C). <sup>1</sup>H NMR (CDCl<sub>3</sub>, 300 MHz) δ 7.99 (dd, *J* = 1.4 and 7.7 Hz, 2H), 7.52 (dt, *J* = 1.4 and 7.5 Hz, 2H), 7.41 (dt, *J* = 1.4 and 7.7 Hz, 2H), 7.18 (dd, *J* = 1.4 and 7.5 Hz, 2H), 3.59 (s, 6H); <sup>13</sup>C NMR (CDCl<sub>3</sub>, 75 MHz) δ 167.4 (CO), 143.2 (C), 131.4 (CH), 130.1 (CH), 129.8 (CH), 129.3 (C), 127.1 (CH), 51.8 (CH<sub>3</sub>); IR ν<sub>max</sub> (thin film) 2924, 1727, 1598, 1574, 1431, 1259, 1189, 1081, 1049, 962, 799, 752, 706 cm<sup>-1</sup>; MS, *m/z* (EI, 70eV) 270 (M<sup>+</sup>, 23%), 239 (13), 211 (100), 197 (27), 180 (30), 152 (27), 139 (20), 76 (23); HRMS, Found: M<sup>+</sup>, 270.0892. C<sub>16</sub>H<sub>14</sub>O<sub>4</sub> requires M<sup>+</sup>, 270.0892.

Concentration of fraction B (*R*<sub>f</sub> = 0.15 in 7:3 v/v hexane-ethyl acetate) afforded compound **47**<sup>20</sup> (28% from **45**) as a white crystalline solid, mp = 291–293 °C (lit.<sup>20</sup> mp = 291–292 °C). <sup>1</sup>H NMR [(CD<sub>3</sub>)<sub>2</sub>SO, 300 MHz] δ 11.69 (br. s, 1H), 8.50 (d, *J* = 7.7 Hz, 1H), 8.38 (d, *J* = 7.4 Hz, 1H), 8.31 (dd, *J* = 1.1 and 7.8 Hz, 1H), 7.84 (dt, *J* = 1.1 and 7.8 Hz, 1H), 7.63 (dt, *J* = 1.1 and 7.4 Hz, 1H), 7.48 (dt, *J* = 1.1 and 7.8 Hz, 1H), 7.35 (dd, *J* = 1.1 and 7.8 Hz, 1H), 7.25 (dt, *J* = 1.1 and 7.8, 1H); <sup>13</sup>C NMR [(CD<sub>3</sub>)<sub>2</sub>SO, 125 MHz] δ 160.8 (CO), 136.6 (C), 134.3 (C), 132.8 (CH), 129.6 (CH), 128.0 (CH), 127.5 (CH), 125.7 (C), 123.3 (CH), 122.6 (CH), 122.3 (CH), 117.6 (C), 116.1 (CH); IR ν<sub>max</sub> (KBr) 2923, 1660, 1632, 1607, 1557, 1511, 1469, 1424, 1369, 1361, 1154, 1037, 749, 726 cm<sup>-1</sup>; MS, *m/z* (EI, 70eV) 195 (M<sup>+</sup>, 100%), 167 (23), 166 (13), 140 (10), 139 (14); HRMS, Found: M<sup>+</sup>, 195.0684. C<sub>13</sub>H<sub>9</sub>NO requires M<sup>+</sup>, 195.0684.

**4,2'-Dinitro-biphenyl-2-carboxylic Acid Methyl Ester (49).** Cross-coupling of 1-bromo-2-nitrobenzene (**1**, R=H) with commercially available compound **48** in the same manner as described above for the preparation of compound **21** gave a yellow oil on work-up. Subjection of this material to flash chromatography flash chromatography (100:3 → 100:8 v/v hexane-ethyl acetate gradient elution) afforded, after concentration of the appropriate fractions (*R*<sub>f</sub> = 0.4 in 55:25:10 v/v/v hexane-CH<sub>2</sub>Cl<sub>2</sub>-ethyl acetate), compound **49** (83%) as a light-yellow solid, mp = 141–142 °C. <sup>1</sup>H NMR (CDCl<sub>3</sub>, 300 MHz) δ 8.94 (d, *J* = 2.5 Hz, 1H), 8.45 (dd, *J* = 1.5 and 8.4 Hz, 1H), 8.24 (dd, *J* = 1.4 and 8.4 Hz, 1H), 7.72 (dt, *J* = 1.5 and 7.6 Hz, 1H), 7.63 (dt, *J* = 1.5 and 7.8 Hz, 1H), 7.46 (d, *J* = 8.4 Hz, 1H), 7.26 (dd, *J* = 1.5 and 7.6 Hz, 1H), 3.75 (s, 3 H); <sup>13</sup>C NMR (CDCl<sub>3</sub>, 125 MHz) δ 164.6 (C), 147.4 (C), 147.3 (C), 146.9 (C), 135.3 (C), 133.4 (CH), 131.3 (CH), 130.7 (CH), 129.9 (C), 129.4 (CH), 126.7 (CH), 125.7 (CH), 124.5 (CH), 52.8 (CH<sub>3</sub>); IR ν<sub>max</sub> (KBr) 3098, 2957, 2853, 1731, 1607, 1524, 1439, 1350, 1255, 1124, 794 cm<sup>-1</sup>; MS, *m/z* (EI, 70eV) 302 (M<sup>+</sup>, 2%), 301 (17), 271 (2), 256 (100), 201 (56), 139 (30); HRMS, Found: M<sup>+</sup>, 302.0542. C<sub>14</sub>H<sub>10</sub>N<sub>2</sub>O<sub>6</sub> requires M<sup>+</sup>, 302.0539.

**8-Amino-6(5*H*)-phenanthridinone (50).** A magnetically stirred mixture of compound **49** (655 mg, 2.17 mmol) and 10% Pd on carbon C (328 mg) in methanol (5 mL) was exposed to dihydrogen (1 atm.). After stirring at 18 °C for 2 h, the reaction mixture was filtered through a short pad of Celite™ and the filtrate was concentrated under reduced pressure. The ensuing light-yellow oil was subjected to flash chromatography (100:5 v/v methanol/triethylamine elution) and thus affording, after concentration of the appropriate fractions (*R*<sub>f</sub> = 0.5 in 8:3:1 v/v/v ethyl acetate/hexane/methanol), compound **50** (283 mg, 62%)

as a light-yellow solid, mp could not be determined, sublimation: >217 °C. <sup>1</sup>H NMR [(CD<sub>3</sub>)<sub>2</sub>SO, 300 MHz] δ 11.40 (s, 1H), 8.14 (m, 2H), 7.43 (m, 1H), 7.28 (m, 2H), 7.15 (m, 1H), 7.08 (dd, *J* = 1.5 and 8.7 Hz, 1H), 5.73 (s, 2H); <sup>13</sup>C NMR [(CD<sub>3</sub>)<sub>2</sub>SO, 75 MHz] δ 160.9 (C), 148.9 (C), 134.6 (C), 127.0 (C), 126.8 (CH), 123.6 (CH), 122.9 (C), 121.9 (CH), 121.5 (CH), 120.1 (CH), 118.7 (C), 115.7 (CH), 109.2 (CH); IR ν<sub>max</sub> (KBr) 3442, 3384, 2923, 2852, 1729, 1663, 1558, 1516, 1485, 1372, 1305, 1082, 896, 826, 744 cm<sup>-1</sup>; MS, *m/z* (EI, 70eV) 210 (M<sup>+</sup>, 100%), 181 (21), 154 (9), 85 (16), 71 (21), 57 (29); HRMS, Found: M<sup>+</sup>, 210.0790. C<sub>13</sub>H<sub>10</sub>N<sub>2</sub>O requires M<sup>+</sup>, 210.0793.

**4-Methoxy-2'-nitro-biphenyl-2-carboxylic Acid Methyl Ester (52).** Cross-coupling of 1-bromo-2-nitrobenzene (**1**, R=H) with commercially available compound **51** in the same manner as described above for the preparation of compound **21** gave a yellow oil on work-up. Subjection of this material to flash chromatography (100:2 → 100:6 v/v hexane-ethyl acetate gradient elution) afforded, after concentration of the appropriate fractions (*R*<sub>f</sub> = 0.4 in 55:25:5 v/v/v hexane-CH<sub>2</sub>Cl<sub>2</sub>-ethyl acetate), compound **52** (36%) as a light-yellow solid, mp = 102–103.5. <sup>1</sup>H NMR (CDCl<sub>3</sub>, 300 MHz) δ 8.06 (dd, *J* = 1.4 and 8.1 Hz, 1H), 7.60 (m, 2H), 7.50 (dt, *J* = 2.0 and 7.6 Hz, 1H), 7.27 (dd, *J* = 1.5 and 7.1 Hz, 1H), 7.14 (m, 2H), 3.90 (s, 3H), 3.66 (s, 3H); <sup>13</sup>C NMR (CDCl<sub>3</sub>, 125 MHz) δ 166.6 (C), 159.2 (C), 148.8 (C), 137.1 (C), 132.6 (CH), 132.0 (C), 131.9 (CH), 131.3 (CH), 129.7 (C), 128.1 (CH), 124.0 (CH), 118.3 (CH), 115.4 (CH), 55.6 (CH<sub>3</sub>), 52.2 (CH<sub>3</sub>); IR ν<sub>max</sub> (KBr) 2952, 2852, 1723, 1609, 1573, 1522, 1468, 1434, 1349, 1222, 1077, 1048, 855, 787, 755 cm<sup>-1</sup>; MS, *m/z* (EI, 70eV) 287 (M<sup>+</sup>, 23%), 242 (38), 241 (100), 226 (52), 211 (28), 139 (26), 127 (20); HRMS, Found: M<sup>+</sup>, 287.0793. C<sub>15</sub>H<sub>13</sub>NO<sub>5</sub> requires M<sup>+</sup>, 287.0794.

**8-Methoxy-6(5H)-phenanthridinone (53).** A magnetically stirred mixture of compound **52** (155 mg, 0.54 mmol) and 10% Pd on carbon C (39 mg) in methanol (4 mL) was exposed to dihydrogen (1 atm.). After stirring at 18 °C for 1 h, the reaction mixture was filtered through a short pad of Celite™ and the filtrate was concentrated under reduced pressure. The ensuing light-yellow oil was subjected to flash chromatography 100:5 v/v methanol/triethylamine elution) thus affording, after concentration of the appropriate fractions (*R*<sub>f</sub> 0.4 in 80:55:25 v/v/v ethyl acetate/hexane/ CH<sub>2</sub>Cl<sub>2</sub>), compound **53** (104 mg, 85%) as a light-yellow solid, mp could not be determined, sublimation: >163 °C. <sup>1</sup>H NMR [(CD<sub>3</sub>)<sub>2</sub>SO, 300 MHz] δ 11.39 (s, 1H), 8.50 (d, *J* = 8.9 Hz, 1H), 8.41 (d, *J* = 7.8 Hz, 1H), 7.77 (m, 2H), 7.57 (t, *J* = 7.8 Hz, 1H), 7.46 (m, 1H), 7.34 (t, *J* = 7.8 Hz, 1H), 3.93 (s, 3H); <sup>13</sup>C NMR [(CD<sub>3</sub>)<sub>2</sub>SO, 75 MHz] δ 159.1 (C), 156.4 (C), 135.9 (C), 128.8 (CH), 126.8 (C), 125.7 (C), 124.7 (CH), 122.7 (CH), 121.4 (CH), 117.4 (C), 113.0 (CH), 108.5 (CH), 55.5 (CH<sub>3</sub>) (one signal obscured or overlapping); IR ν<sub>max</sub> (KBr) 2921, 2847, 1658, 1609, 1453, 1363, 1290, 1217, 1024, 867, 845, 818, 739 cm<sup>-1</sup>; MS, *m/z* (EI, 70eV) 225 (M<sup>+</sup>, 100%), 210 (30), 196 (32), 182 (18), 154 (30), 153 (22), 57 (16); HRMS, Found: M<sup>+</sup>, 225.0790. C<sub>14</sub>H<sub>11</sub>NO<sub>2</sub> requires M<sup>+</sup>, 225.0790.

**2'-Nitro-biphenyl-2,5-dicarboxylic Acid Dimethyl Ester (55).** Cross-coupling of 1-bromo-2-nitrobenzene (**1**, R=H) with commercially available compound **54** in the same manner as described above for the preparation of compound **21** gave a yellow oil on work-up. Subjection of this material to flash chromatography (100:3 → 100:10 v/v hexane-ethyl acetate gradient elution) afforded, after concentration of the appropriate fractions ( $R_f = 0.4$  in 55:25:10 v/v/v hexane/CH<sub>2</sub>Cl<sub>2</sub>/ethyl acetate), compound **55** (48%) as a light-yellow solid, mp = 122.5–124 °C. <sup>1</sup>H NMR [(CD<sub>3</sub>)<sub>2</sub>SO, 300 MHz] δ 8.17 (dd,  $J = 1.2$  and 8.1 Hz, 1H), 8.12 (s, 2H), 7.83–7.60 (complex m, 2H), 7.69 (m, 1H), 7.42 (dd,  $J = 1.4$  and 7.6 Hz, 1H), 3.88 (s, 3H), 3.61 (s, 3H); <sup>13</sup>C NMR [(CD<sub>3</sub>)<sub>2</sub>SO, 75 MHz] δ 166.0 (C), 165.8 (C), 147.9 (C), 140.4 (C), 136.4 (C), 133.3 (C), 133.0 (CH), 132.3 (C), 131.4 (CH), 131.0 (CH), 130.6 (CH), 129.0 (CH), 128.7 (CH), 124.2 (CH), 52.6 (CH<sub>3</sub>), 52.4 (CH<sub>3</sub>); IR  $\nu_{\max}$  (KBr) 2954, 2850, 1725, 1613, 1573, 1525, 1435, 1349, 1289, 1241, 1117, 749 cm<sup>-1</sup>; MS,  $m/z$  (EI, 70eV) 284 [(M-CH<sub>3</sub>O)<sup>+</sup>, 19%], 269 (100), 223 (23), 195 (170), 167 (13), 151 (16), 139 (25), 119 (9); HRMS, Found: (M-CH<sub>3</sub>O)<sup>+</sup>, 284.0561. C<sub>16</sub>H<sub>13</sub>NO<sub>6</sub> requires (M-CH<sub>3</sub>O)<sup>+</sup>, 284.0559.

**6-Oxo-5,6-dihydrophenanthridine-9-carboxylic Acid Methyl Ester (56).** A magnetically stirred mixture of compound **55** (253 mg, 0.80 mmol) and 10% Pd on carbon (63 mg) in methanol (4 mL) was exposed to dihydrogen (1 atm.). After stirring at 18 °C for 1 h, the reaction mixture was filtered through a short pad of Celite™ and the filtrate was concentrated under reduced pressure. The ensuing residue was subjected to flash chromatography (100:5 v/v methanol/ triethylamine elution) thus affording, after concentration of the appropriate fractions ( $R_f = 0.4$  in 80:55:25 v/v/v ethyl acetate/hexane/CH<sub>2</sub>Cl<sub>2</sub>), compound **56** (108 mg, 53%) as a white solid, mp could not be determined, sublimation: > 185 °C. <sup>1</sup>H NMR [(CD<sub>3</sub>)<sub>2</sub>SO, 300 MHz] δ 11.89 (s, 1H), 8.96 (s, 1 H), 8.44 (d,  $J = 8.4$  Hz, 2H), 8.13 (d,  $J = 8.4$  Hz, 1H), 7.54 (t,  $J = 7.6$  Hz, 1H), 7.39 (d,  $J = 8.4$  Hz, 1H), 7.30 (t,  $J = 7.6$  Hz, 1H), 3.96 (s, 3H); <sup>13</sup>C NMR [(CD<sub>3</sub>)<sub>2</sub>SO, 75 MHz] δ 165.8 (C), 160.1 (C), 136.8 (C), 134.3 (C), 133.3 (C), 130.2 (CH), 128.7 (C), 128.3 (CH), 127.6 (CH), 123.6 (CH), 123.4 (CH), 122.6 (CH), 117.0 (C), 116.3 (CH), 52.7 (CH<sub>3</sub>); IR  $\nu_{\max}$  (KBr) 2918, 2849, 1728, 1657, 1611, 1503, 1434, 1419, 1287, 1256, 1026, 856, 748, 724 cm<sup>-1</sup>; MS,  $m/z$  (EI, 70eV) 253 (M<sup>+</sup>, 48%), 222 (17), 194 (12), 149 (23), 71 (54), 57 (100); HRMS, Found: M<sup>+</sup>, 253.0739. C<sub>15</sub>H<sub>11</sub>NO<sub>3</sub> requires M<sup>+</sup>, 253.0739.

**6-(2-Nitrophenyl)benzo[1,3]dioxole-5-carboxylic Acid Methyl Ester (58).** Cross-coupling of 1-bromo-2-nitrobenzene (**1**, R=H) with bromo-ester **57**<sup>21</sup> was carried out in the same manner as described above for the preparation of compound **21** save for the use of a reaction temperature of 90 °C and a reaction time of 6 h. Subjection of the yellow oil obtained on work-up to flash chromatography (4:1 v/v hexane-ethyl acetate elution) afforded two fractions, A and B.

Concentration of fraction A ( $R_f = 0.2$ ) afforded a *ca.* 2:1 mixture of compound **58** (40% as determined by <sup>1</sup>H NMR analysis) and **2,2'-dinitrobiphenyl** [product from reductive dimerization of compound **1** (R=H)] as a yellow oil. Trituration (diethyl ether) of a small portion of this mixture afforded



an analytically pure sample of compound **58** as a yellow crystalline solid, mp = 133–134 °C. <sup>1</sup>H NMR (CDCl<sub>3</sub>, 300 MHz) δ 8.06 (dd, *J* = 1.3 and 8.1 Hz, 1H), 7.59 (dt, *J* = 1.3 and 8.1 Hz, 1H), 7.50 (s, 1H), 7.48 (dt, *J* = 1.3 and 8.1 Hz, 1H), 7.23 (dd, *J* = 1.3 and 8.1 Hz, 1H), 6.64 (s, 1H), 6.08 (m, 2H), 3.60 (s, 3H); <sup>13</sup>C NMR (CDCl<sub>3</sub>, 125 MHz) δ 165.8 (CO), 150.8 (C), 148.3 (C), 147.4 (C), 137.1 (C), 135.8 (C), 132.6 (CH), 131.3 (CH), 128.2 (CH), 124.0 (CH), 121.9 (C), 110.3 (CH), 110.1 (CH), 102.2 (CH<sub>2</sub>), 52.0 (CH<sub>3</sub>); IR ν<sub>max</sub> (KBr) 1721, 1525, 1505, 1479, 1374, 1349, 1255, 1037 cm<sup>-1</sup>; MS, *m/z* (EI, 70eV) 301 (M<sup>+</sup>, 28%), 255 (100), 240 (58); HRMS, Found: M<sup>+</sup>, 301.0588. C<sub>15</sub>H<sub>11</sub>NO<sub>6</sub> requires M<sup>+</sup>, 301.0586. Anal.: Found C 59.85; H 3.65; N 4.70. Calculated for C<sub>15</sub>H<sub>11</sub>NO<sub>6</sub>; C 59.80; H 3.68; N 4.65%.

Concentration of fraction B (*R<sub>f</sub>* = 0.1) afforded **[5,5']bi{benzo[1,3]dioxolyl}-6,6'-dicarboxylic acid dimethyl ester**<sup>21</sup> (product from reductive dimerization of compound **57**) (27% as determined by <sup>1</sup>H NMR analysis) as a white crystalline solid, mp = 159–160 °C (lit.<sup>21</sup> mp = 160–160.5 °C). <sup>1</sup>H NMR (CDCl<sub>3</sub>, 300 MHz) δ 7.44 (s, 2H), 6.58 (s, 2H), 6.04 (m, 4H), 3.61 (s, 6H); <sup>13</sup>C NMR (CDCl<sub>3</sub>, 75 MHz) δ 166.3 (CO), 150.2 (C), 146.6 (C), 139.5 (C), 122.4 (C), 110.3 (CH), 109.8 (CH), 101.9 (CH<sub>2</sub>), 51.8 (CH<sub>3</sub>); IR ν<sub>max</sub> (KBr) 2953, 2923, 1727, 1615, 1504, 1481, 1435, 1374, 1353, 1248, 1123, 1037, 933 cm<sup>-1</sup>; MS, *m/z* (EI, 70eV) 358 (M<sup>+</sup>, 62%), 299 (100), 284 (59), 268 (45); HRMS, Found: M<sup>+</sup>, 358.0691. C<sub>18</sub>H<sub>14</sub>O<sub>8</sub> requires M<sup>+</sup>, 358.0689.

**Crinasidine {[1,3]-Dioxolo[4,5-*j*]-6(5*H*)-phenanthridinone} (59).** A solution of compound **58** (11.0 mg, 0.037 mmol) in ethanol (10 mL) was treated with 10% Pd on carbon (3 mg) and the resulting mixture stirred at 18 °C under an atmosphere of dihydrogen for 16 h. The dihydrogen atmosphere was then replaced by nitrogen and the reaction mixture treated with sodium ethoxide (2.0 mL of a 0.4 M solution in ethanol). After 5 h at 18 °C the reaction mixture was concentrated under reduced pressure and the residue subjected to flash chromatography (90:9.5:0.5 v/v/v chloroform-methanol-5% aq. ammonia elution). In this manner two fractions, A and B, were obtained.

Concentration of fraction A (*R<sub>f</sub>* = 0.8) afforded compound **58** (3.2 mg, 29% recovery) as yellow crystalline solid and identical, in all respects, with an authentic sample.

Concentration of fraction B (*R<sub>f</sub>* = 0.4) afforded compound **59**<sup>13</sup> (5.8 mg, 92% at 71% conversion) as white crystalline masses, mp = > 350 °C (lit.<sup>13</sup> mp = > 350 °C with partial sublimation at 340 °C). <sup>1</sup>H NMR [(CD<sub>3</sub>)<sub>2</sub>SO, 500 MHz] δ 11.62 (broad s, 1H), 8.29 (d, *J* = 8.0 Hz, 1H), 8.03 (s, 1H), 7.63 (s, 1H), 7.42 (t, *J* = 8.0 Hz, 1H), 7.32 (d, *J* = 8.0 Hz, 1H), 7.20 (t, *J* = 8.0 Hz, 1H), 6.22 (s, 2H); <sup>13</sup>C NMR [(CD<sub>3</sub>)<sub>2</sub>SO, 125 MHz] δ 160.2, 152.2, 148.1, 135.9, 131.2, 128.8, 123.2, 122.1, 121.1, 117.7, 115.9, 105.1, 102.3, 101.6; IR ν<sub>max</sub> (KBr) 1663, 1584, 1472, 1430, 1240, 1040 cm<sup>-1</sup>; MS, *m/z* (EI, 70eV) 239 (M<sup>+</sup>, 100%), 162 (26), 91 (25); HRMS, Found: M<sup>+</sup>, 239.0581. C<sub>14</sub>H<sub>9</sub>NO<sub>3</sub> requires M<sup>+</sup>, 239.0582.

## References

1. (a) Arnold, Z.; Holy, A. *Collect. Czech. Chem. Commun.* **1961**, 26, 3059. (b) Robertson, I. R.; Sharp, J. T. *Tetrahedron* **1984**, 40, 3095.
2. Curran, D. P.; Kuo, S. C. *J. Org. Chem.* **1984**, 49, 2063.
3. Eisch, J. J.; Gopal, H.; Kuo, C. T. *J. Org. Chem.* **1978**, 43, 2190.
4. Denton, D. A.; Smalley, R. K.; Suschitzky, H. *J. Chem. Soc.* **1964**, 2421.
5. Nicolaou, K. C.; Dai, W.-M. *J. Am. Chem. Soc.* **1992**, 114, 8908.
6. These compounds were prepared using modifications of the methods reported in the following papers: (a) Bovonsombat, P.; McNelis, E. *Tetrahedron* **1993**, 49, 1525. (b) Piers, E.; Grierson, J. R.; Lau, K. C.; Nagakura, I. *Can. J. Chem.* **1982**, 60, 210. Full details of these preparations will be reported in due course.
7. Curran, A. C. W.; Shepherd, R. G. *J. Chem. Soc., Perkin Trans. 1* **1976**, 983.
8. Vieweg, H.; Wagner, G. *Pharmazie* **1979**, 34, 785.
9. Hahn, W. E.; Lesiak, J. *Pol. J. Chem.* **1985**, 59, 627.
10. Kar, G. K.; Karmakar, A. C.; Makur, A.; Ray, J. K. *Heterocycles* **1995**, 41, 911.
11. Gilchrist, T. L.; Healy, A. M. M. *Tetrahedron* **1993**, 49, 2543.
12. Kallianpur, C. S.; Merchant, J. R. *J. Indian Chem. Soc.* **1961**, 38, 27.
13. Banwell, M. G.; Cowden, C. J. *Aust. J. Chem.* **1994**, 47, 2235.
14. Bohlmann, F.; Fritz, G. *Chem. Ber.* **1976**, 109, 3371.
15. Zhang, H.; Larock, R. C. *J. Org. Chem.* **2002**, 67, 9318.
16. Clemo, G. R.; Felton, D. G. I. *J. Chem. Soc.* **1951**, 671; *Chem. Abstr.* **1951**, 45, 9060c.
17. Jousseau, B.; Villeneuve, P. *Tetrahedron* **1989**, 45, 1145.
18. Bailey, A. S.; Seager, J. F. *J. Chem. Soc., Perkin Trans. 1* **1974**, 763.
19. Hennings, D. D.; Iwama, T.; Rawal, V. H. *Org. Lett.* **1999**, 1, 1205.
20. *The Aldrich Library of <sup>13</sup>C and <sup>1</sup>H NMR Spectra*, Edition 1, Vol. 2; Aldrich Chemical Co.: Milwaukee, Wisconsin, 1993; p 1437A.
21. Brown, E.; Robin, J.-P.; Dhal, R. *Tetrahedron* **1982**, 38, 2579.

300 MHz  $^1\text{H}$  NMR Spectrum in  $\text{CDCl}_3$

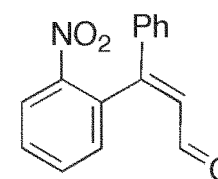

7

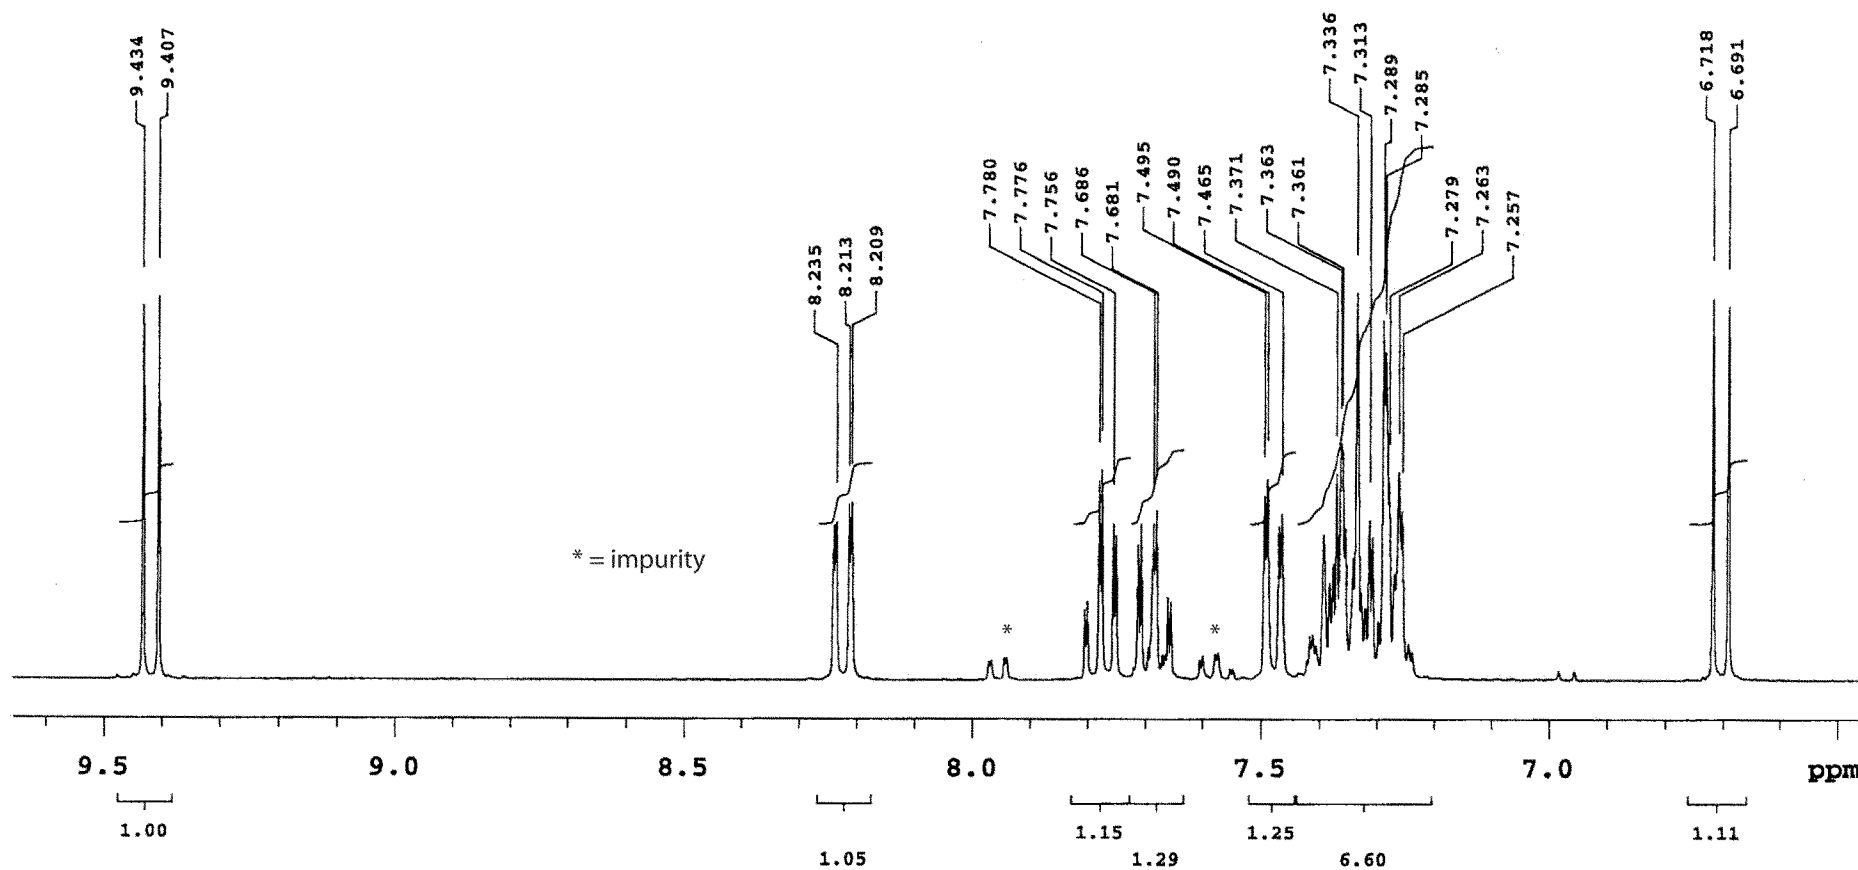

75 MHz  $^{13}\text{C}$  NMR Spectrum in  $\text{CDCl}_3$

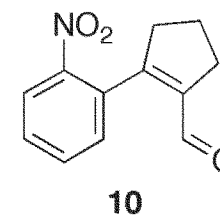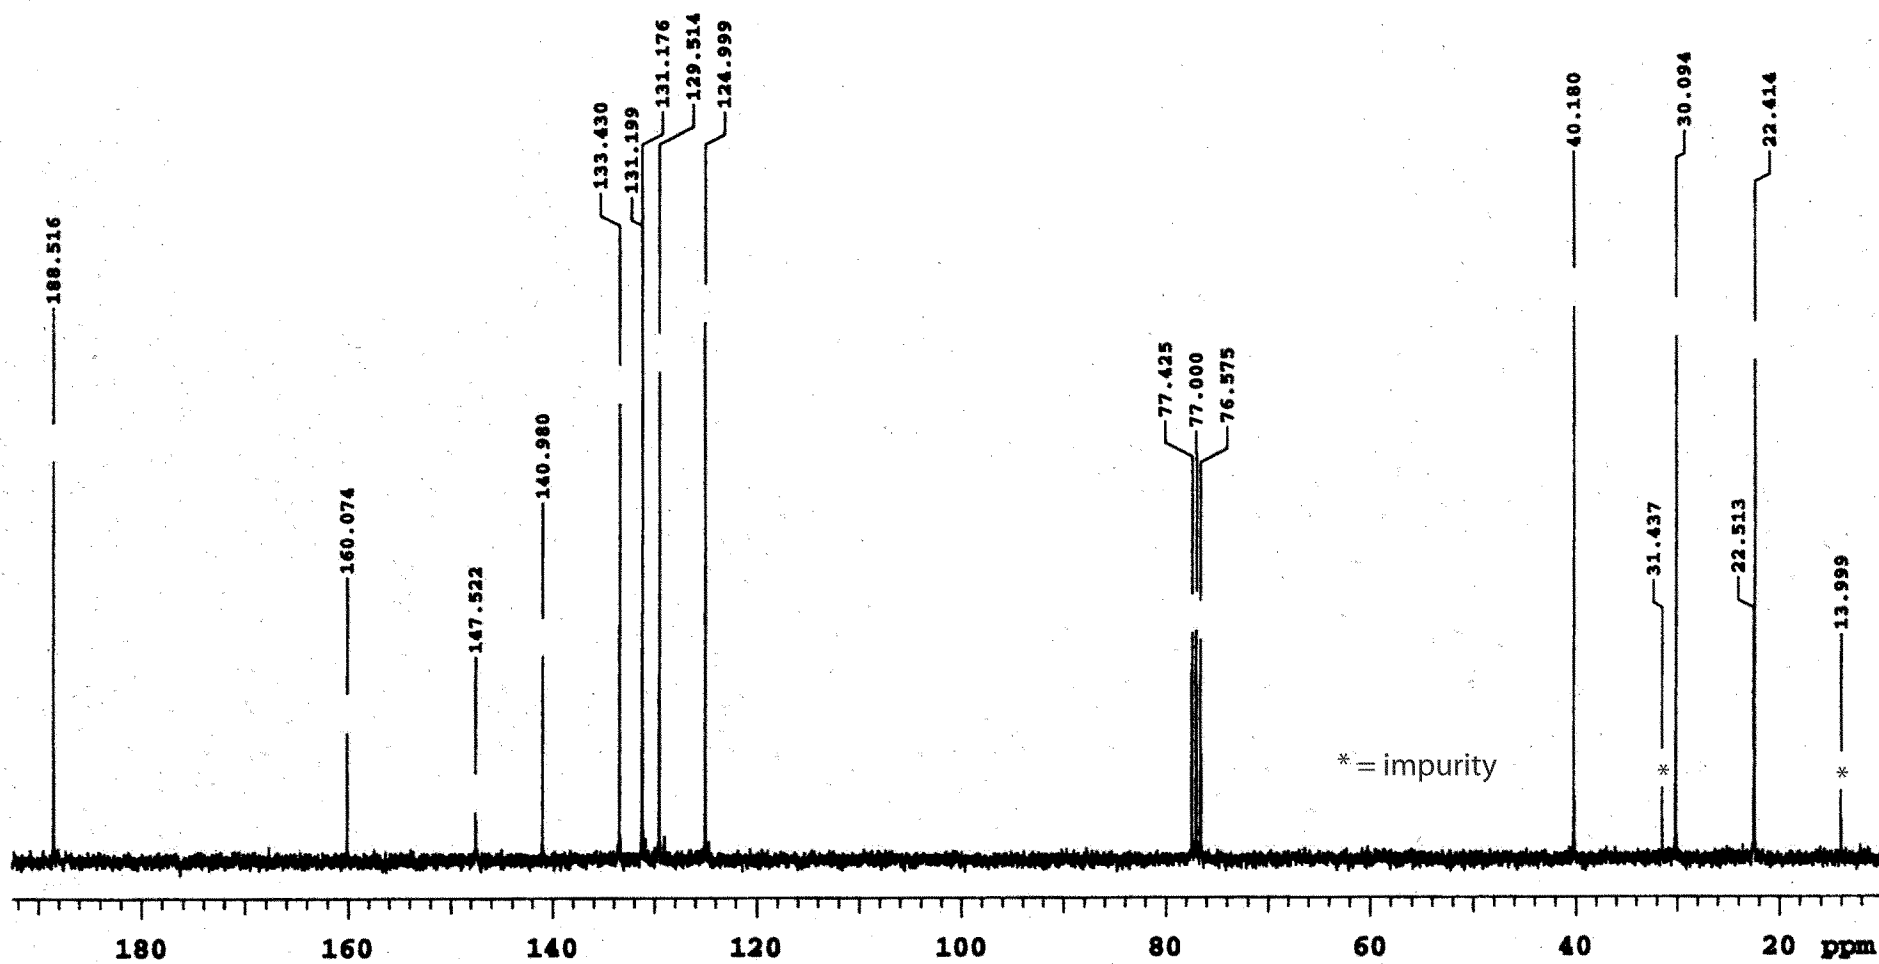

75 MHz  $^{13}\text{C}$  NMR Spectrum in  $\text{CDCl}_3$

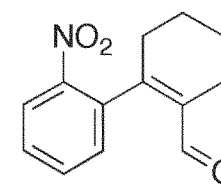

**13**

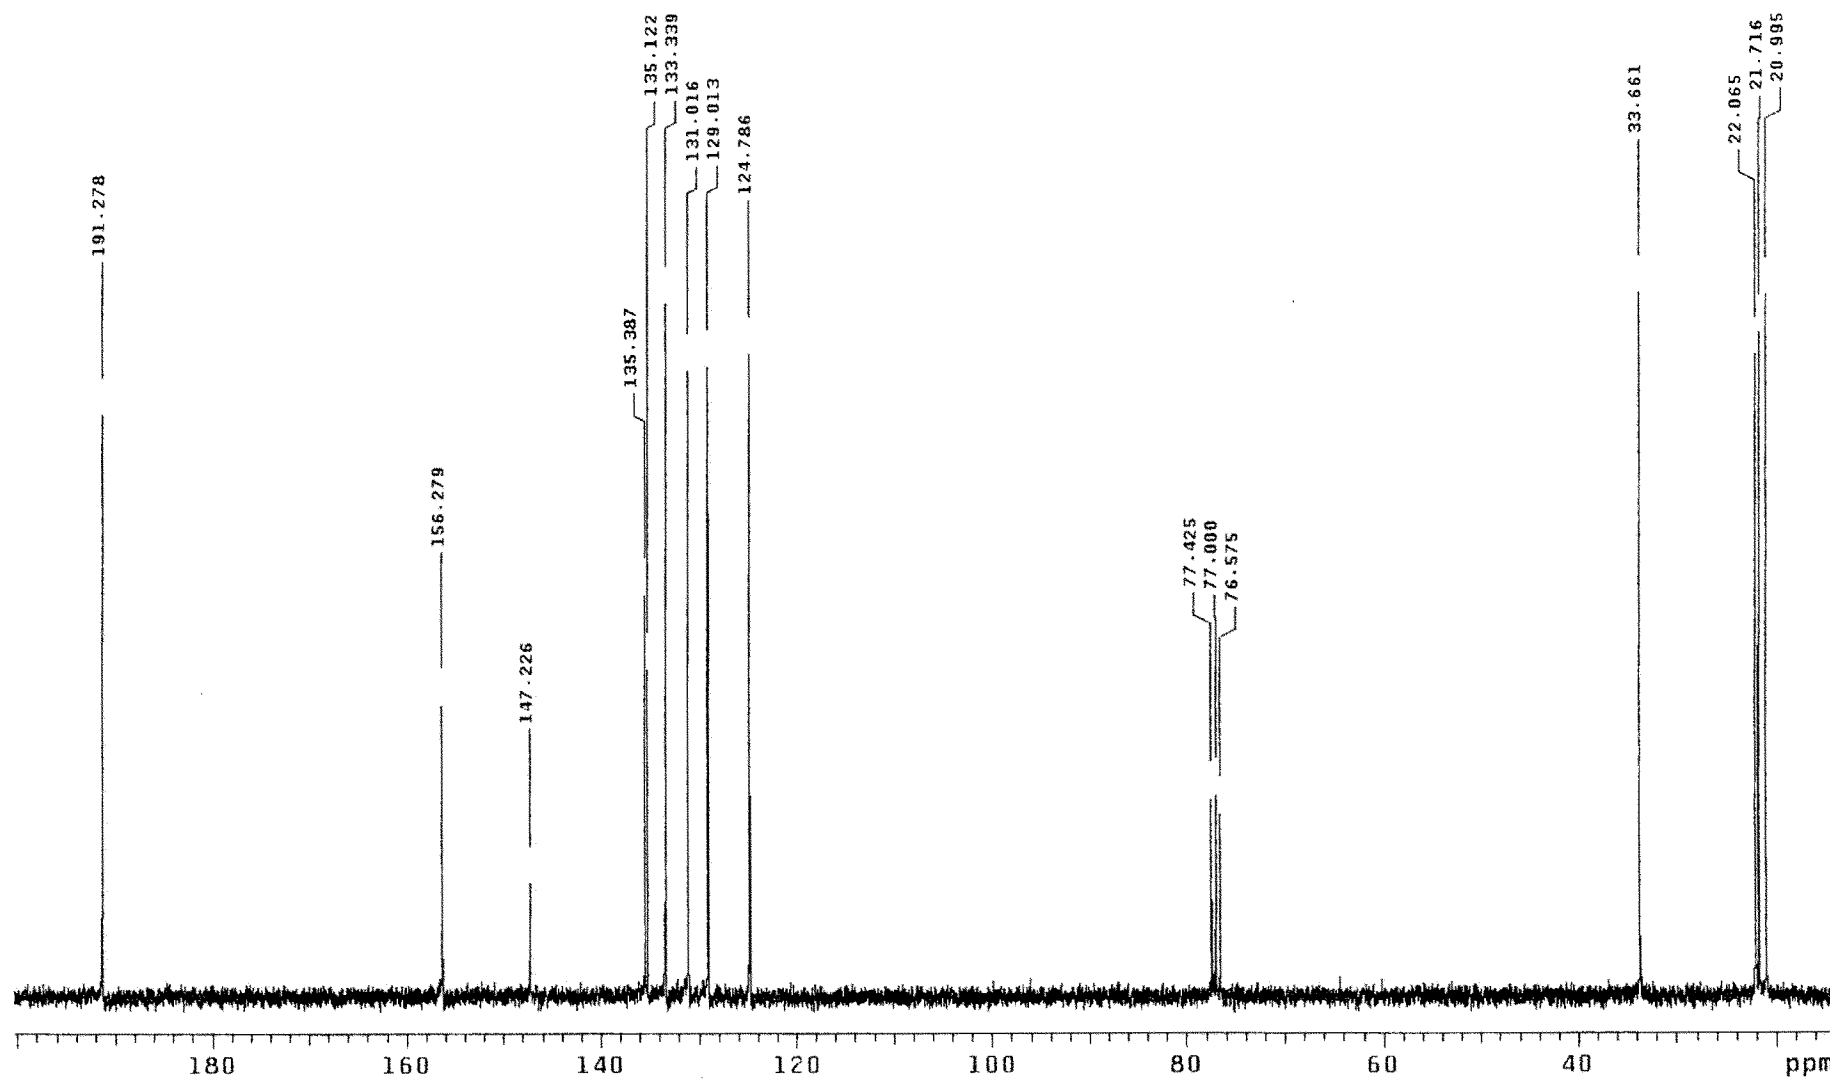

75 MHz  $^{13}\text{C}$  NMR Spectrum in  $\text{CDCl}_3$

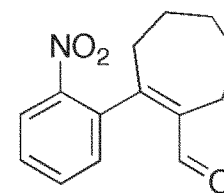

**16**

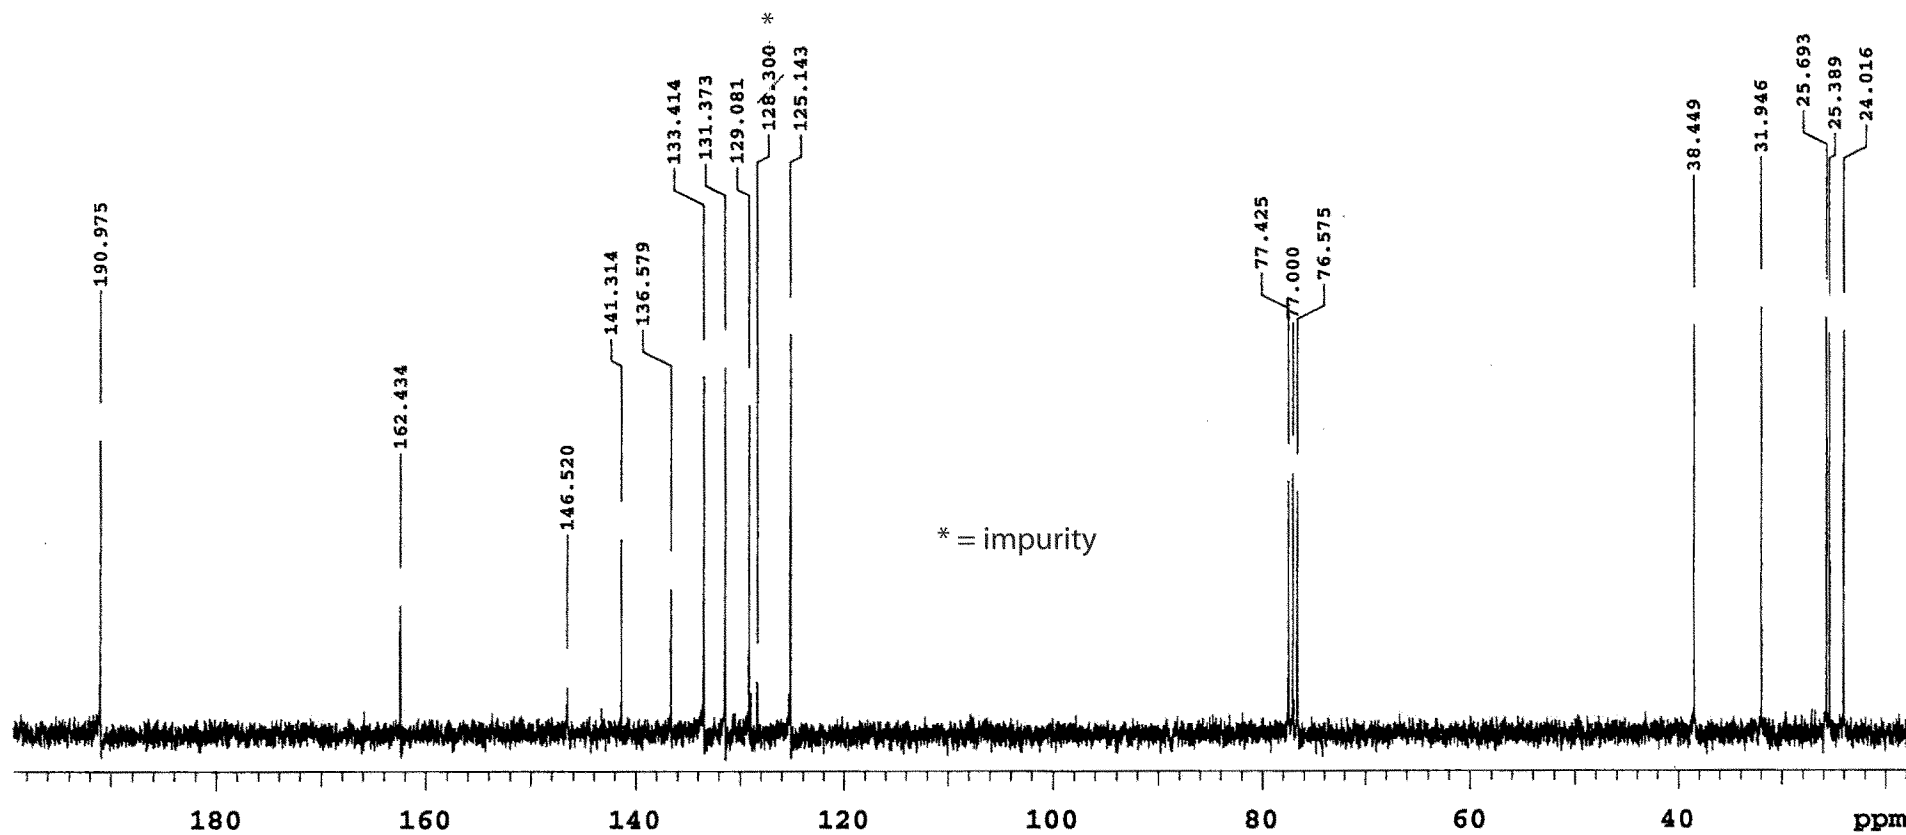

75 MHz  $^{13}\text{C}$  NMR Spectrum in  $\text{CDCl}_3$

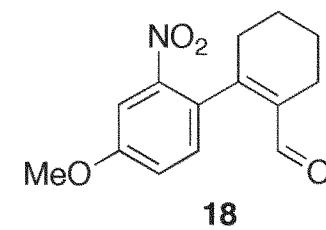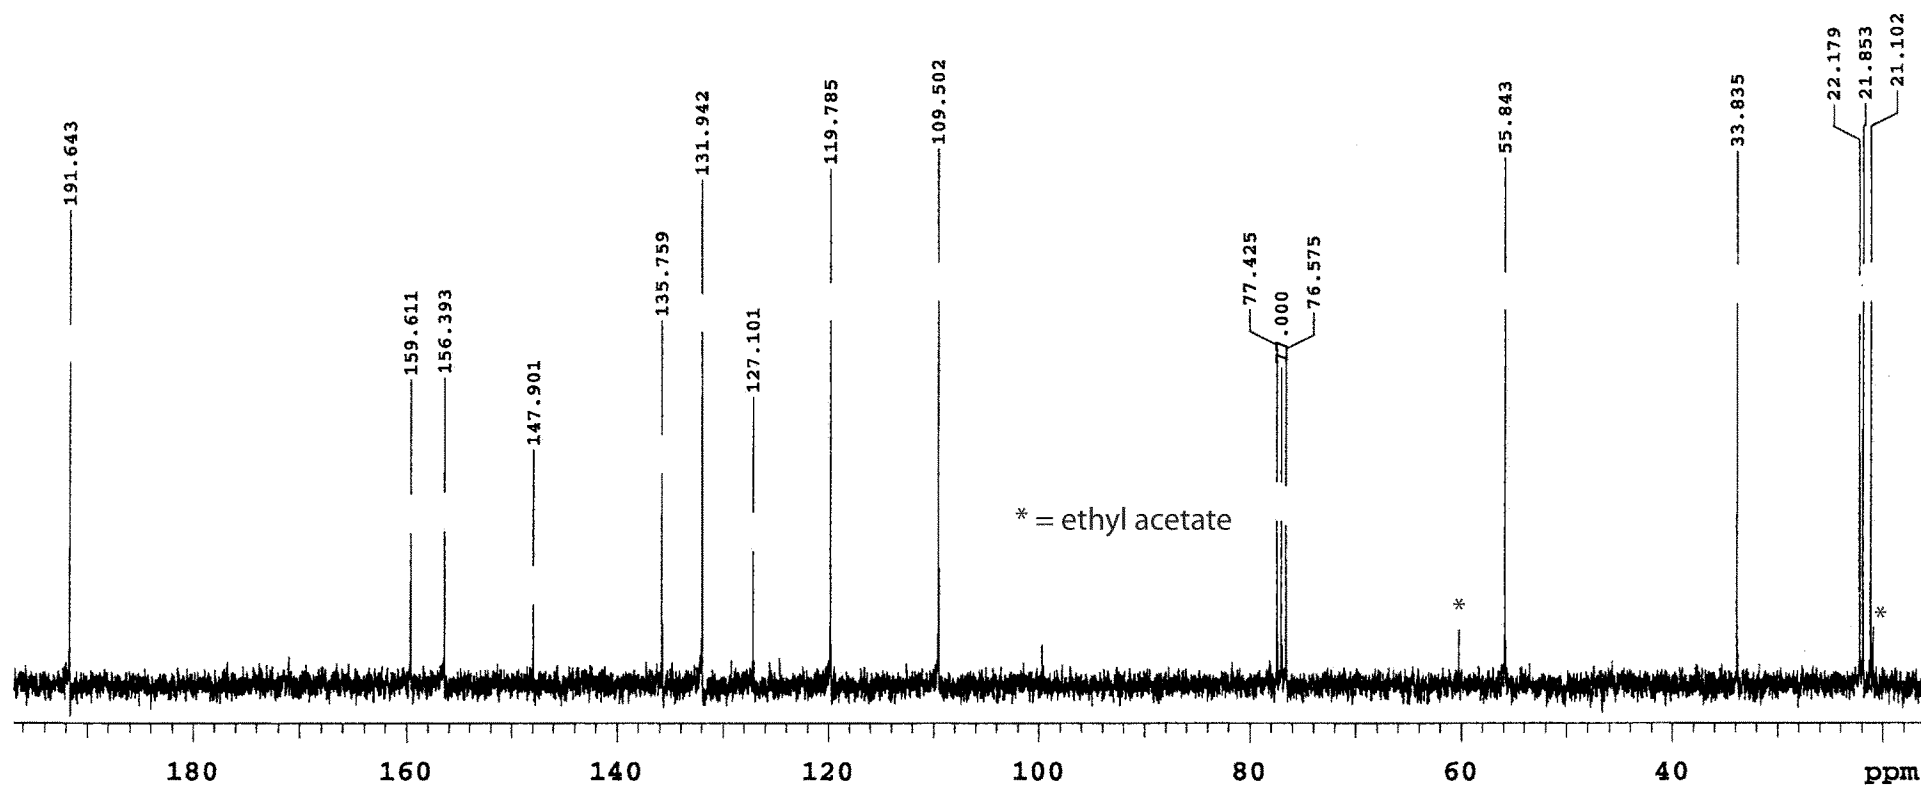

300 MHz  $^1\text{H}$  NMR Spectrum in  $\text{CDCl}_3$

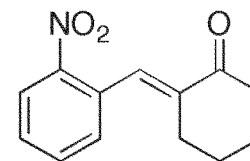

**21**

| INDEX | FREQUENCY | PPM   | HEIGHT | INDEX | FREQUENCY | PPM   | HEIGHT |
|-------|-----------|-------|--------|-------|-----------|-------|--------|
| 1     | 2433.623  | 8.110 | 44.0   | 35    | 524.842   | 1.749 | 23.5   |
| 2     | 2432.524  | 8.107 | 44.7   | 36    | 521.543   | 1.738 | 53.8   |
| 3     | 2425.513  | 8.083 | 49.5   | 37    | 515.356   | 1.717 | 64.0   |
| 4     | 2424.413  | 8.080 | 48.7   | 38    | 509.720   | 1.699 | 45.2   |
| 5     | 2294.778  | 7.648 | 20.2   | 39    | 503.809   | 1.679 | 20.4   |
| 6     | 2293.816  | 7.644 | 21.2   |       |           |       |        |
| 7     | 2287.355  | 7.623 | 49.7   |       |           |       |        |
| 8     | 2286.255  | 7.619 | 49.6   |       |           |       |        |
| 9     | 2279.794  | 7.598 | 36.9   |       |           |       |        |
| 10    | 2278.694  | 7.594 | 36.3   |       |           |       |        |
| 11    | 2271.683  | 7.571 | 64.1   |       |           |       |        |
| 12    | 2254.637  | 7.514 | 29.4   |       |           |       |        |
| 13    | 2253.262  | 7.509 | 32.5   |       |           |       |        |
| 14    | 2246.526  | 7.487 | 44.6   |       |           |       |        |
| 15    | 2245.838  | 7.484 | 45.9   |       |           |       |        |
| 16    | 2239.102  | 7.462 | 21.4   |       |           |       |        |
| 17    | 2237.728  | 7.457 | 20.7   |       |           |       |        |
| 18    | 2197.311  | 7.323 | 51.0   |       |           |       |        |
| 19    | 2189.613  | 7.297 | 44.7   |       |           |       |        |
| 20    | 2178.478  | 7.260 | 20.2   |       |           |       |        |
| 21    | 772.839   | 2.576 | 66.9   |       |           |       |        |
| 22    | 766.103   | 2.553 | 133.7  |       |           |       |        |
| 23    | 762.391   | 2.541 | 63.4   |       |           |       |        |
| 24    | 759.505   | 2.531 | 117.9  |       |           |       |        |
| 25    | 755.930   | 2.519 | 84.8   |       |           |       |        |
| 26    | 754.556   | 2.515 | 85.9   |       |           |       |        |
| 27    | 749.744   | 2.499 | 58.1   |       |           |       |        |
| 28    | 747.819   | 2.492 | 54.2   |       |           |       |        |
| 29    | 588.216   | 1.960 | 16.8   |       |           |       |        |
| 30    | 581.755   | 1.939 | 42.2   |       |           |       |        |
| 31    | 576.393   | 1.921 | 59.1   |       |           |       |        |
| 32    | 569.932   | 1.899 | 58.2   |       |           |       |        |
| 33    | 563.334   | 1.877 | 25.9   |       |           |       |        |
| 34    | 527.866   | 1.759 | 24.0   |       |           |       |        |

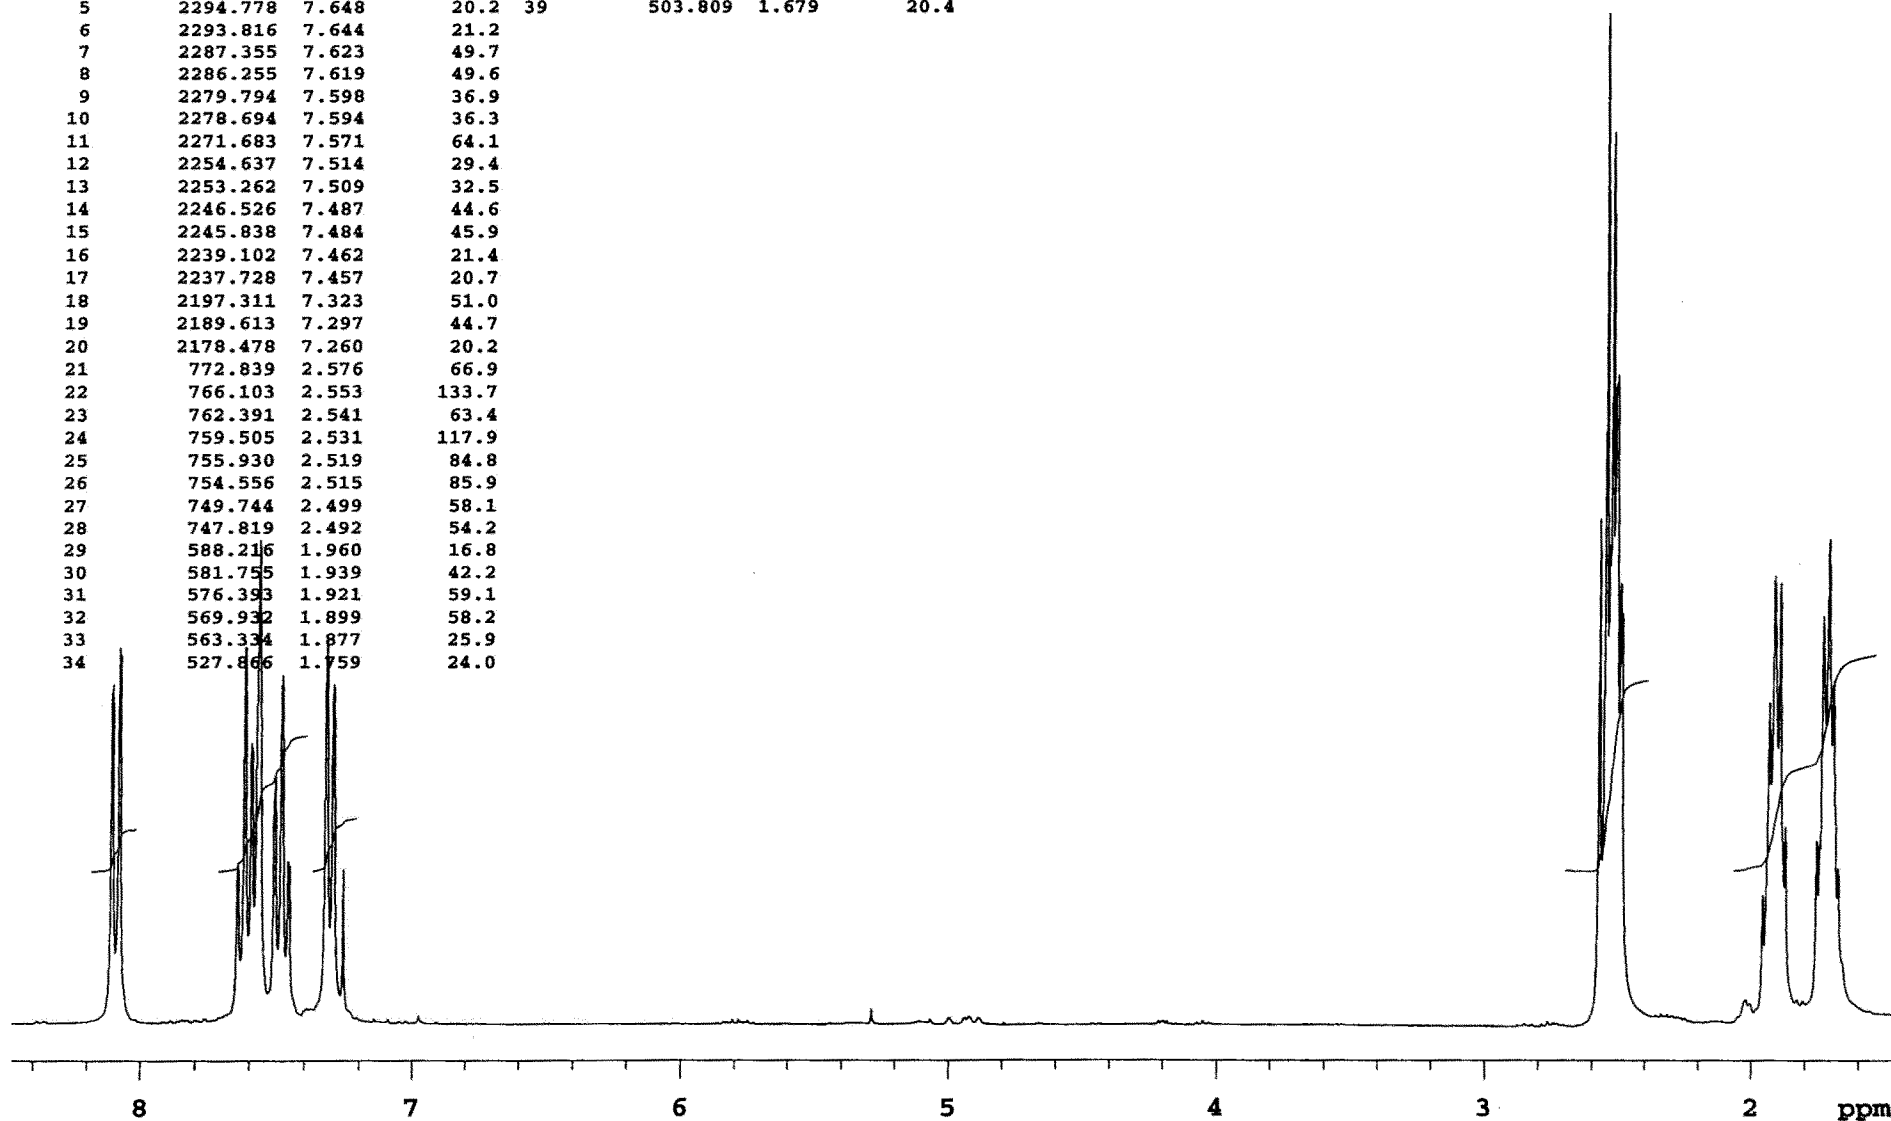



| INDEX | FREQUENCY | PPM   | HEIGHT |
|-------|-----------|-------|--------|
| 1     | 2159.507  | 7.197 | 87.7   |
| 2     | 2158.957  | 7.195 | 86.3   |
| 3     | 768.578   | 2.561 | 74.8   |
| 4     | 761.842   | 2.539 | 123.9  |
| 5     | 757.992   | 2.526 | 110.7  |
| 6     | 751.806   | 2.505 | 67.1   |
| 7     | 496.660   | 1.655 | 141.5  |
| 8     | 492.124   | 1.640 | 110.4  |
| 9     | 487.037   | 1.623 | 106.5  |

300 MHz  $^1\text{H}$  NMR Spectrum in  $\text{CDCl}_3$

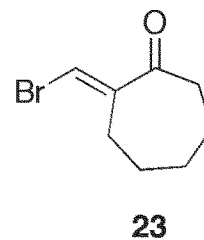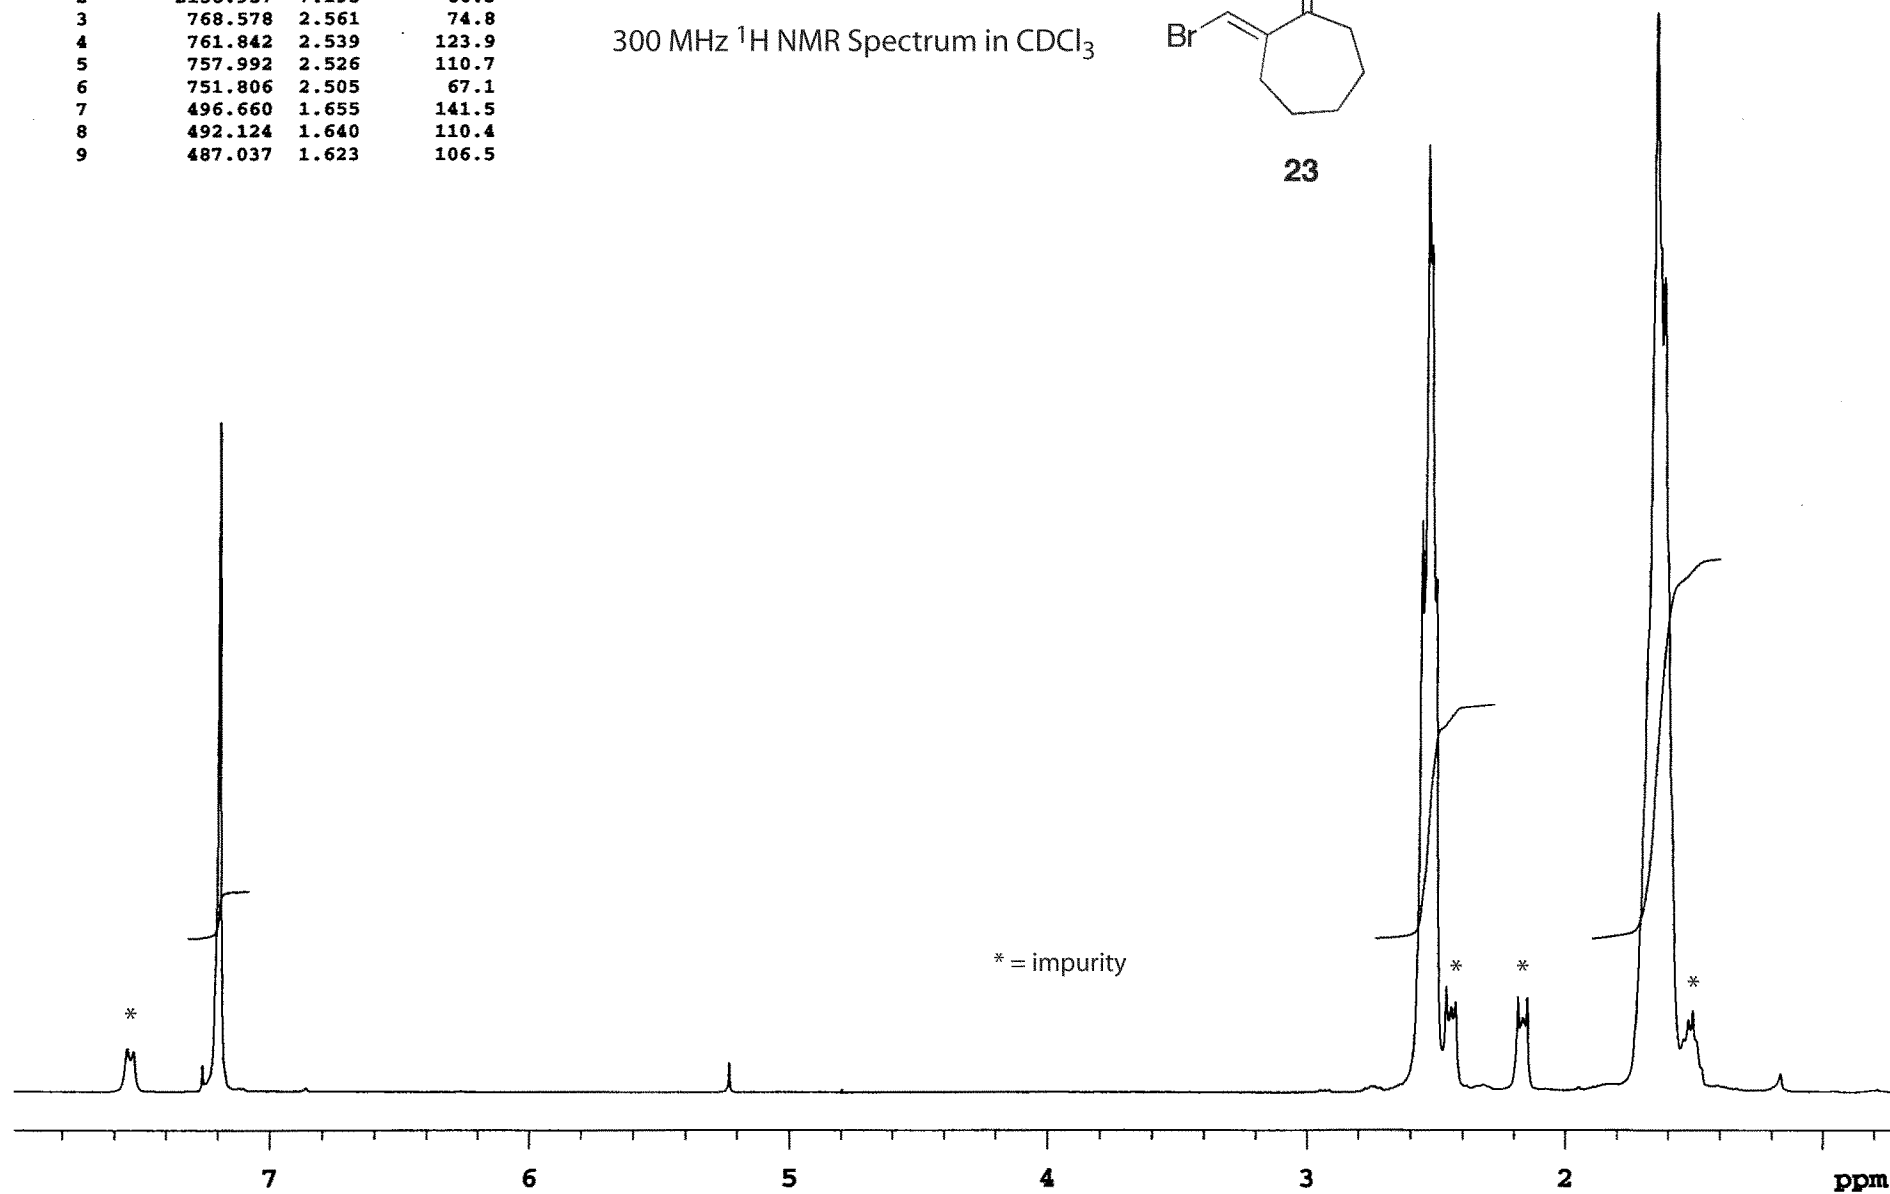

| INDEX | FREQUENCY | PPM   | HEIGHT | INDEX | FREQUENCY | PPM   | HEIGHT |
|-------|-----------|-------|--------|-------|-----------|-------|--------|
| 1     | 2440.909  | 8.135 | 49.5   | 35    | 815.455   | 2.718 | 51.4   |
| 2     | 2439.672  | 8.130 | 50.0   | 36    | 808.857   | 2.696 | 52.9   |
| 3     | 2432.661  | 8.107 | 54.8   | 37    | 727.474   | 2.424 | 66.0   |
| 4     | 2431.424  | 8.103 | 54.8   | 38    | 726.786   | 2.422 | 71.3   |
| 5     | 2314.711  | 7.714 | 87.0   | 39    | 721.563   | 2.405 | 47.9   |
| 6     | 2298.902  | 7.661 | 23.4   | 40    | 716.339   | 2.387 | 70.3   |
| 7     | 2297.940  | 7.658 | 22.5   | 41    | 537.764   | 1.792 | 20.1   |
| 8     | 2297.527  | 7.657 | 23.6   | 42    | 531.715   | 1.772 | 74.5   |
| 9     | 2291.341  | 7.636 | 55.6   | 43    | 528.829   | 1.762 | 104.4  |
| 10    | 2290.104  | 7.632 | 53.8   | 44    | 525.804   | 1.752 | 107.7  |
| 11    | 2283.780  | 7.611 | 38.8   | 45    | 517.006   | 1.723 | 15.8   |
| 12    | 2282.818  | 7.608 | 33.3   | 46    | 504.909   | 1.683 | 32.9   |
| 13    | 2282.406  | 7.606 | 35.9   | 47    | 495.011   | 1.650 | 23.1   |
| 14    | 2256.699  | 7.521 | 26.1   | 48    | 489.924   | 1.633 | 34.4   |
| 15    | 2256.149  | 7.519 | 29.8   | 49    | 486.075   | 1.620 | 40.6   |
| 16    | 2255.324  | 7.516 | 31.6   | 50    | 481.401   | 1.604 | 27.2   |
| 17    | 2254.637  | 7.514 | 30.7   | 51    | 479.339   | 1.597 | 23.9   |
| 18    | 2248.588  | 7.494 | 43.1   |       |           |       |        |
| 19    | 2247.900  | 7.491 | 46.3   |       |           |       |        |
| 20    | 2247.076  | 7.489 | 46.2   |       |           |       |        |
| 21    | 2246.388  | 7.486 | 30.1   |       |           |       |        |
| 22    | 2241.164  | 7.469 | 18.6   |       |           |       |        |
| 23    | 2240.477  | 7.467 | 20.7   |       |           |       |        |
| 24    | 2239.652  | 7.464 | 20.1   |       |           |       |        |
| 25    | 2238.965  | 7.462 | 19.0   |       |           |       |        |
| 26    | 2187.001  | 7.288 | 40.3   |       |           |       |        |
| 27    | 2186.451  | 7.287 | 43.4   |       |           |       |        |
| 28    | 2185.901  | 7.285 | 52.6   |       |           |       |        |
| 29    | 2185.076  | 7.282 | 40.6   |       |           |       |        |
| 30    | 2184.664  | 7.281 | 37.3   |       |           |       |        |
| 31    | 2178.478  | 7.260 | 104.7  |       |           |       |        |
| 32    | 2177.378  | 7.256 | 36.9   |       |           |       |        |
| 33    | 2176.966  | 7.255 | 32.4   |       |           |       |        |
| 34    | 819.717   | 2.732 | 45.7   |       |           |       |        |

300 MHz  $^1\text{H}$  NMR Spectrum in  $\text{CDCl}_3$

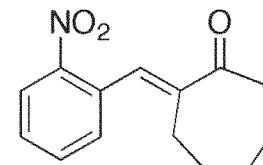

24

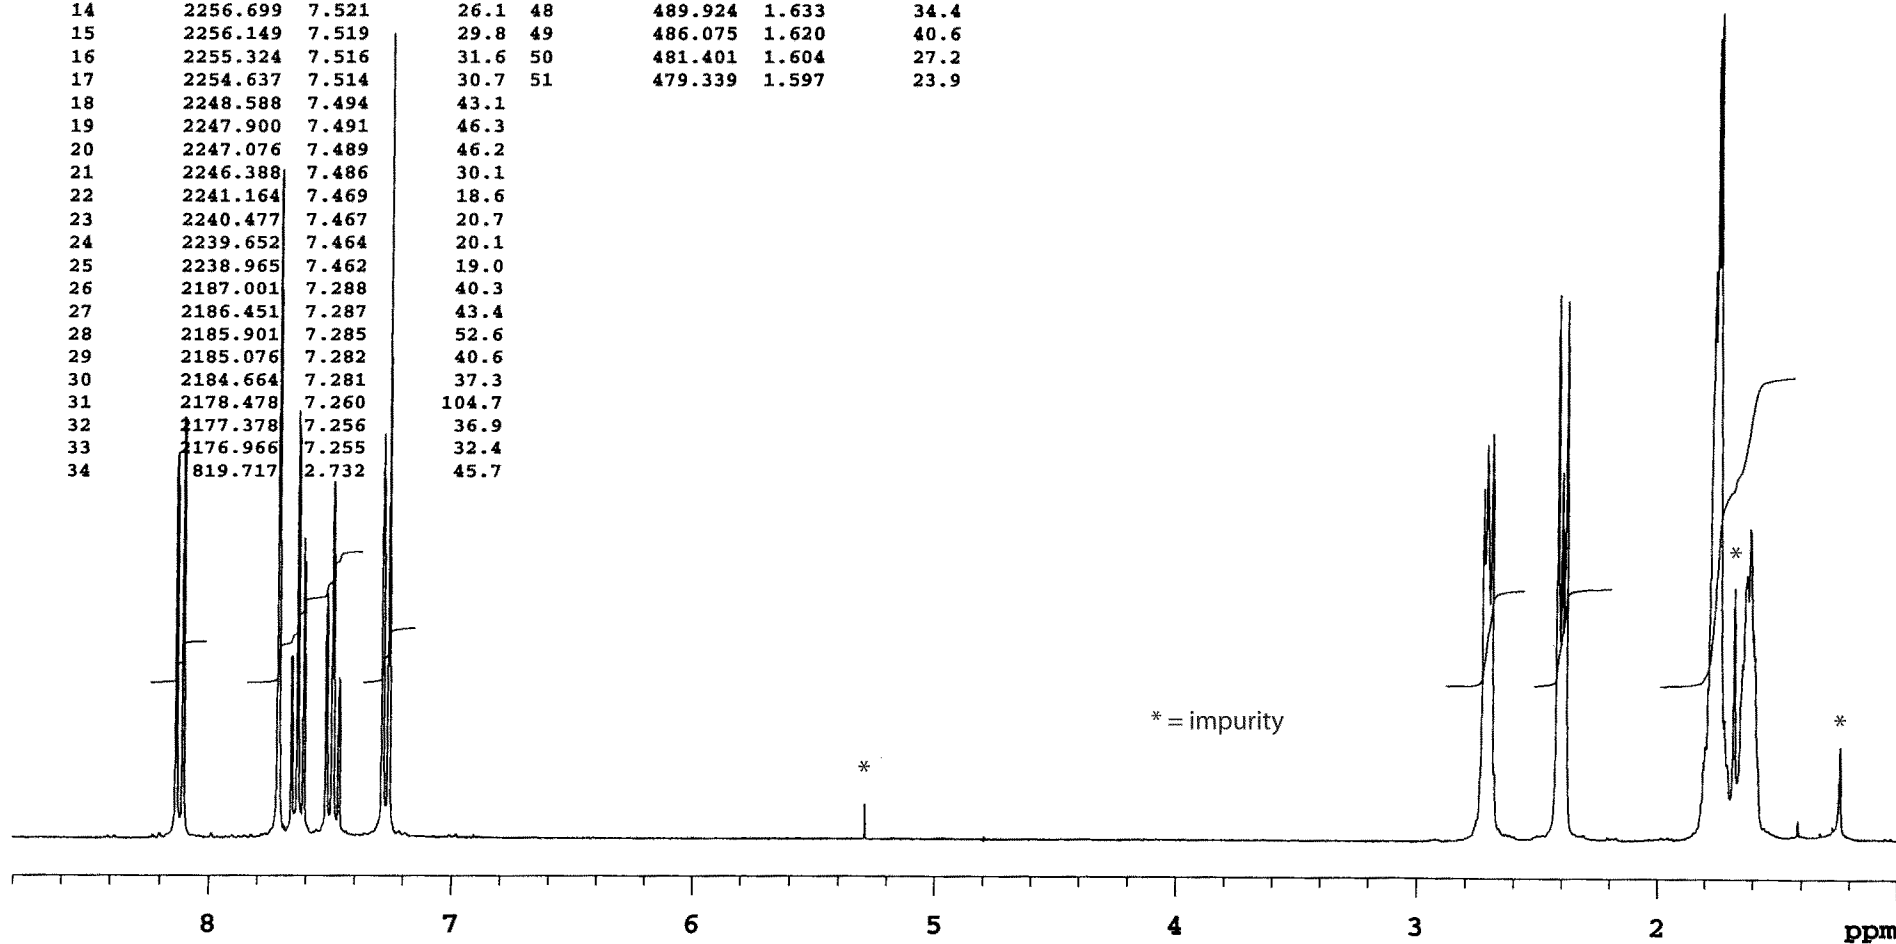

| INDEX | FREQUENCY | PPM   | HEIGHT |
|-------|-----------|-------|--------|
| 1     | 2283.368  | 7.610 | 16.3   |
| 2     | 2280.756  | 7.601 | 16.6   |
| 3     | 2259.448  | 7.530 | 6.2    |
| 4     | 2257.523  | 7.523 | 11.2   |
| 5     | 2255.599  | 7.517 | 5.7    |
| 6     | 2178.478  | 7.260 | 16.5   |
| 7     | 2175.591  | 7.250 | 9.5    |
| 8     | 2166.793  | 7.221 | 18.2   |
| 9     | 2150.021  | 7.165 | 12.5   |
| 10    | 2147.409  | 7.156 | 11.5   |
| 11    | 2141.498  | 7.137 | 6.3    |
| 12    | 2138.749  | 7.128 | 6.1    |
| 13    | 1177.141  | 3.923 | 1.6    |
| 14    | 1168.343  | 3.894 | 139.7  |
| 15    | 772.702   | 2.575 | 16.0   |
| 16    | 769.815   | 2.565 | 8.8    |
| 17    | 766.103   | 2.553 | 33.7   |
| 18    | 759.367   | 2.531 | 23.2   |
| 19    | 757.168   | 2.523 | 8.4    |
| 20    | 589.591   | 1.965 | 3.0    |
| 21    | 582.992   | 1.943 | 6.5    |
| 22    | 577.768   | 1.925 | 8.5    |
| 23    | 575.156   | 1.917 | 5.1    |
| 24    | 571.170   | 1.903 | 8.6    |
| 25    | 568.145   | 1.893 | 2.2    |
| 26    | 564.571   | 1.881 | 3.6    |
| 27    | 530.203   | 1.767 | 3.9    |
| 28    | 527.179   | 1.757 | 3.0    |
| 29    | 524.017   | 1.746 | 8.0    |
| 30    | 517.693   | 1.725 | 9.0    |
| 31    | 511.920   | 1.706 | 5.9    |
| 32    | 509.720   | 1.699 | 2.8    |
| 33    | 505.871   | 1.686 | 3.1    |
| 34    | 503.259   | 1.677 | 3.3    |

300 MHz  $^1\text{H}$  NMR Spectrum in  $\text{CDCl}_3$

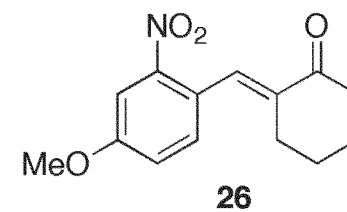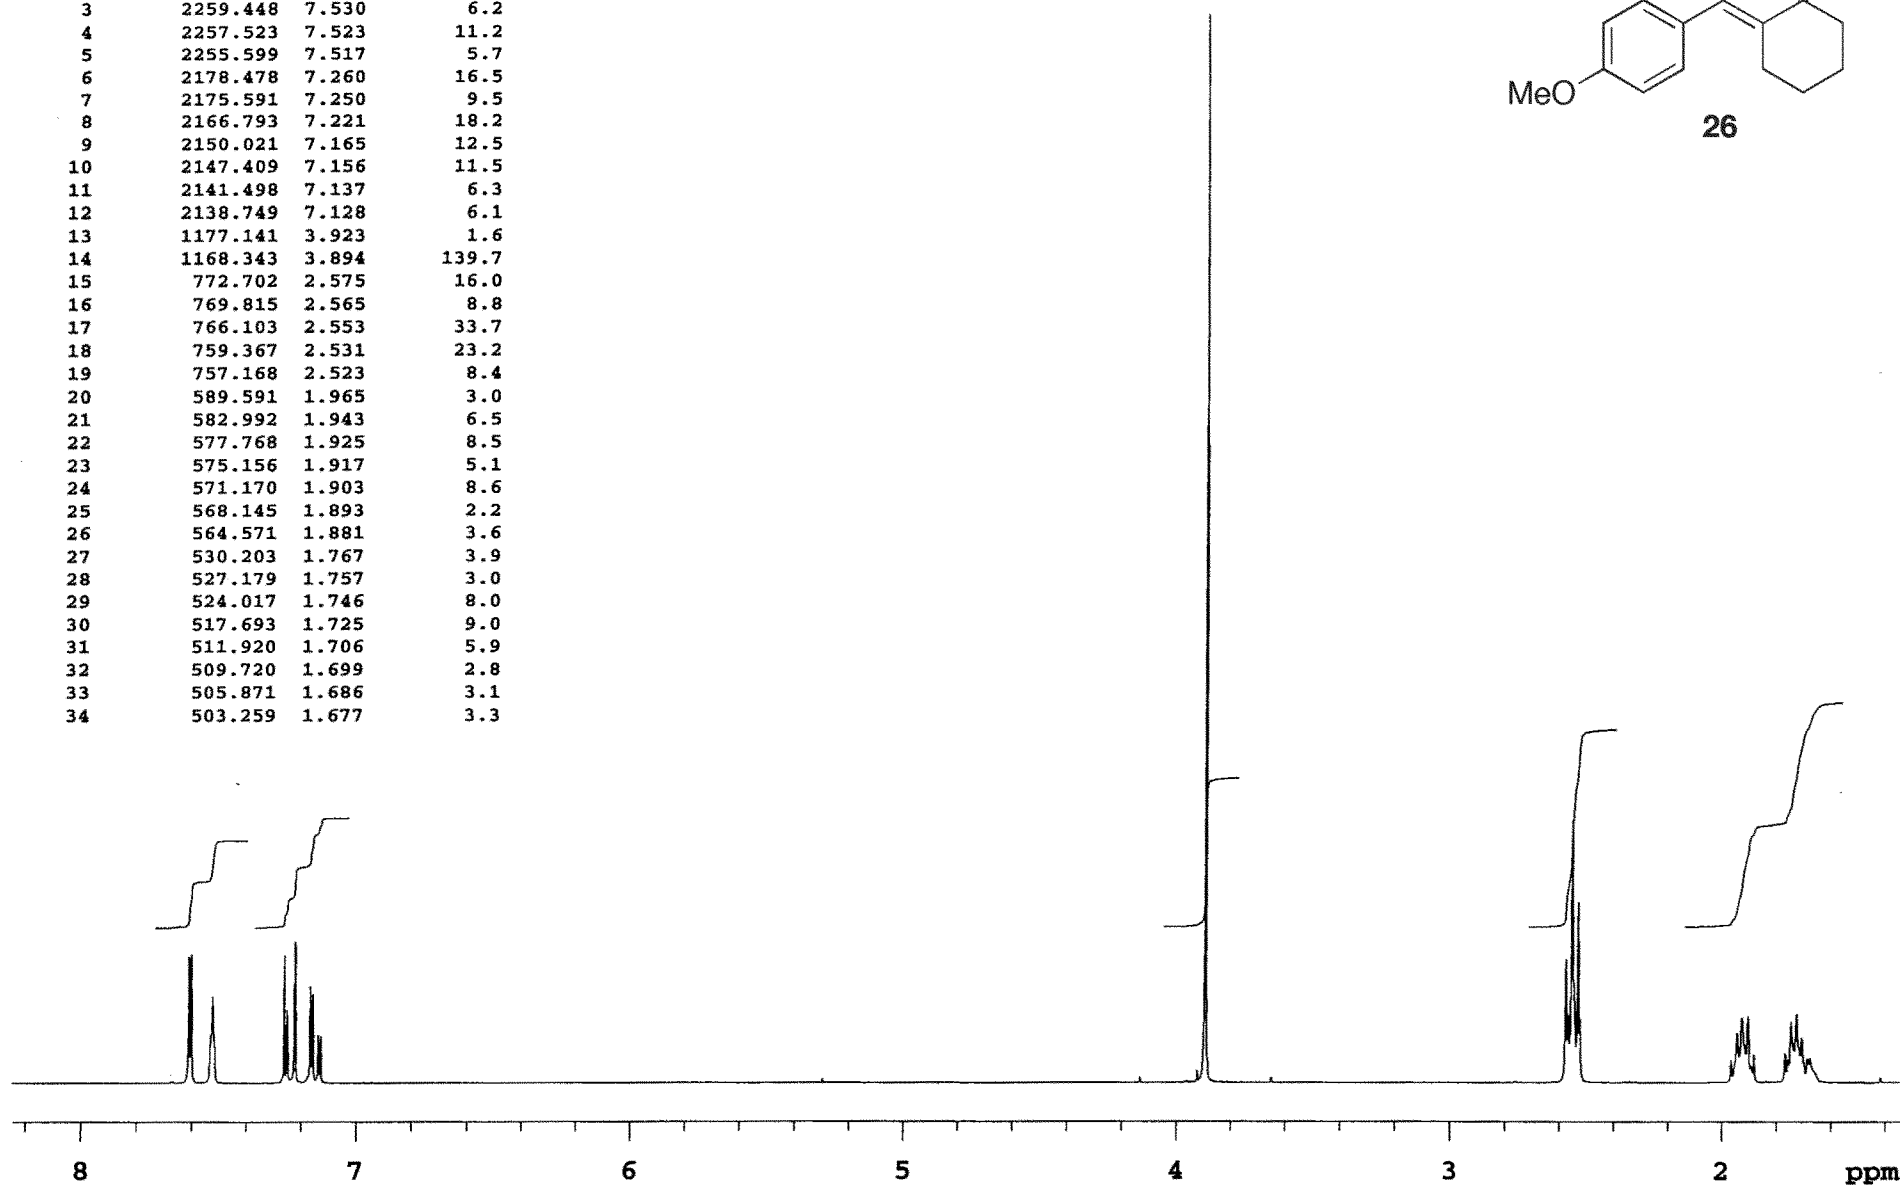

300 MHz  $^1\text{H}$  NMR Spectrum in  $\text{CDCl}_3$

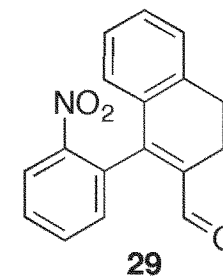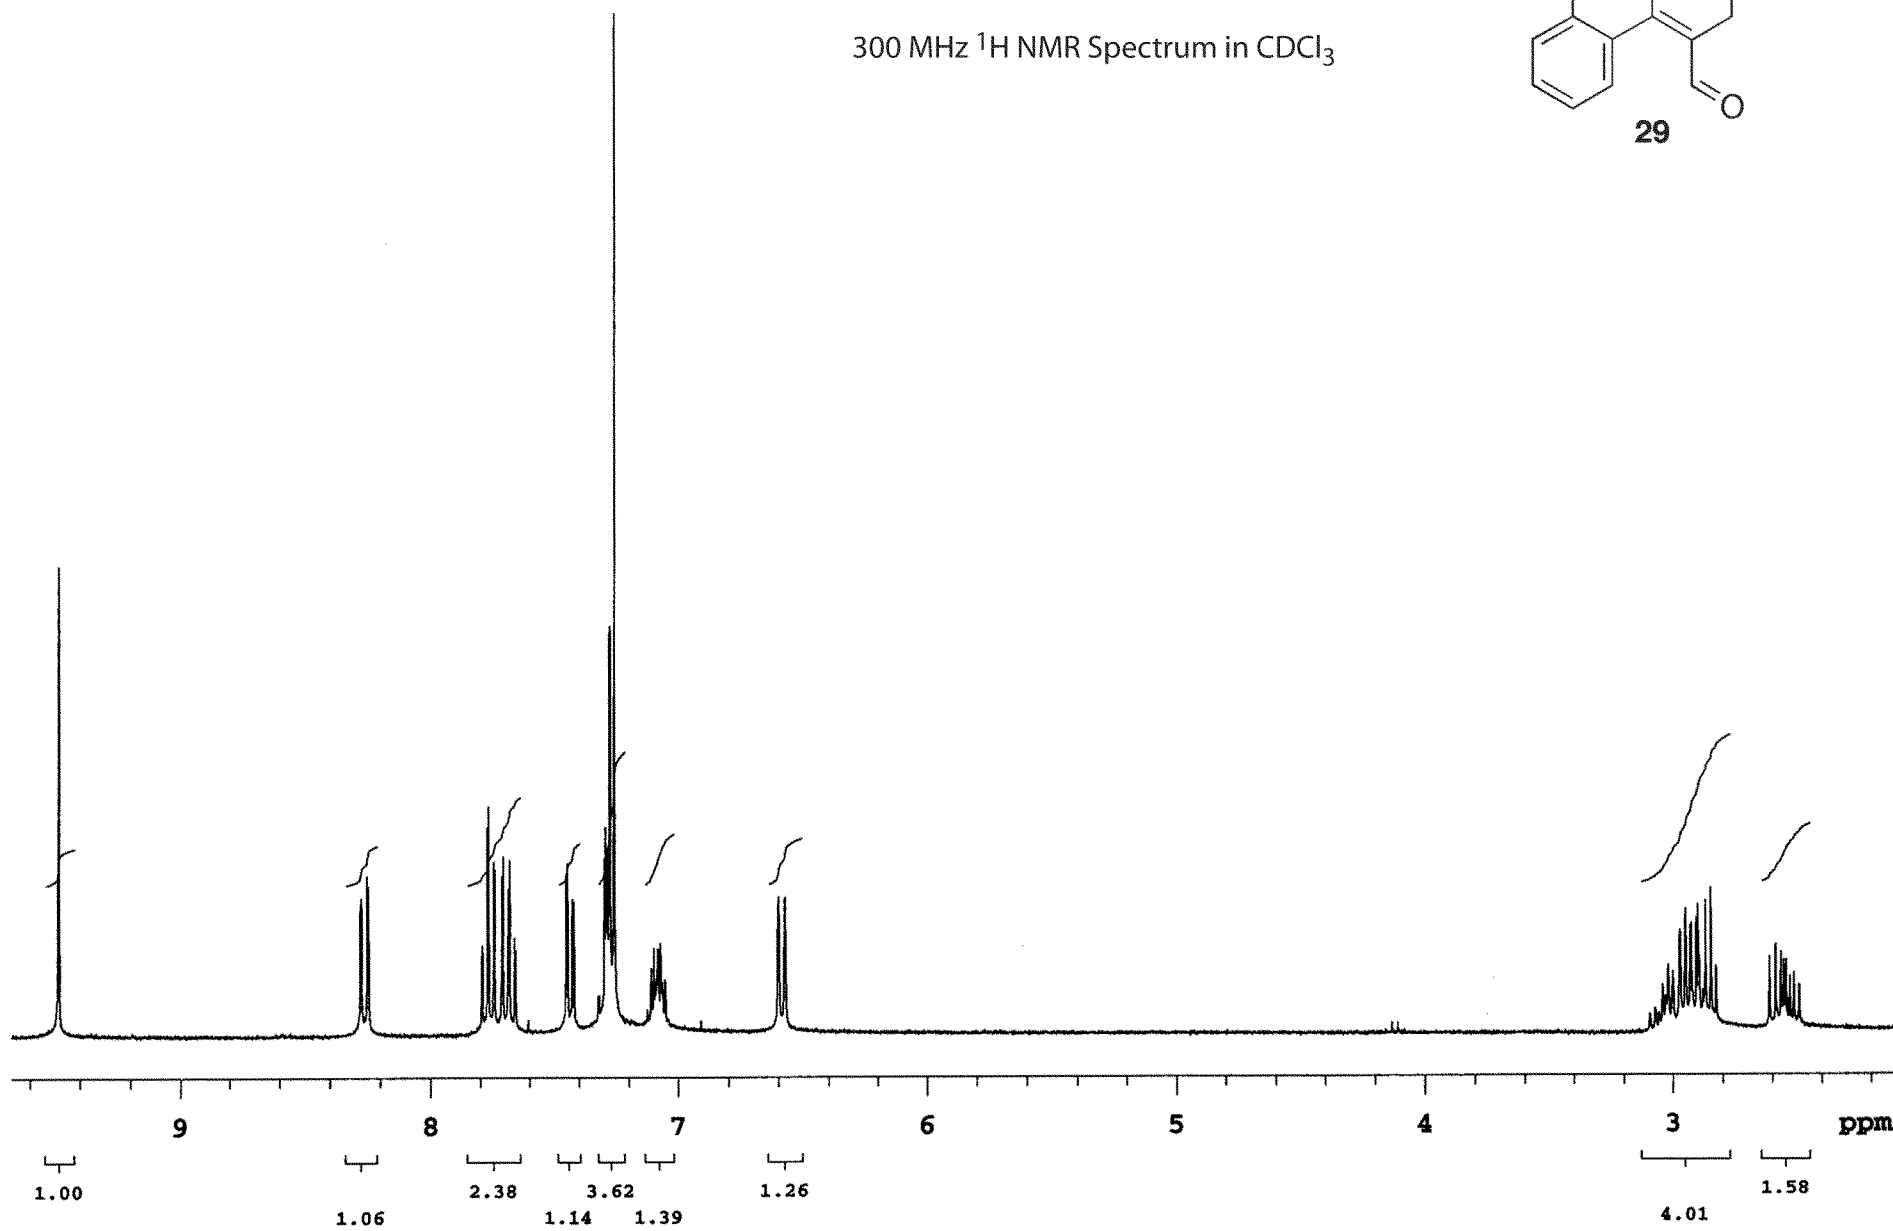

300 MHz  $^1\text{H}$  NMR Spectrum in  $\text{CDCl}_3$

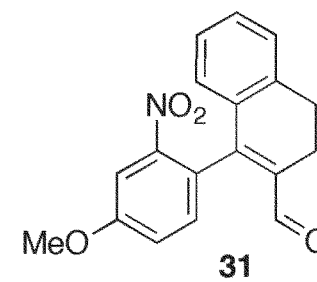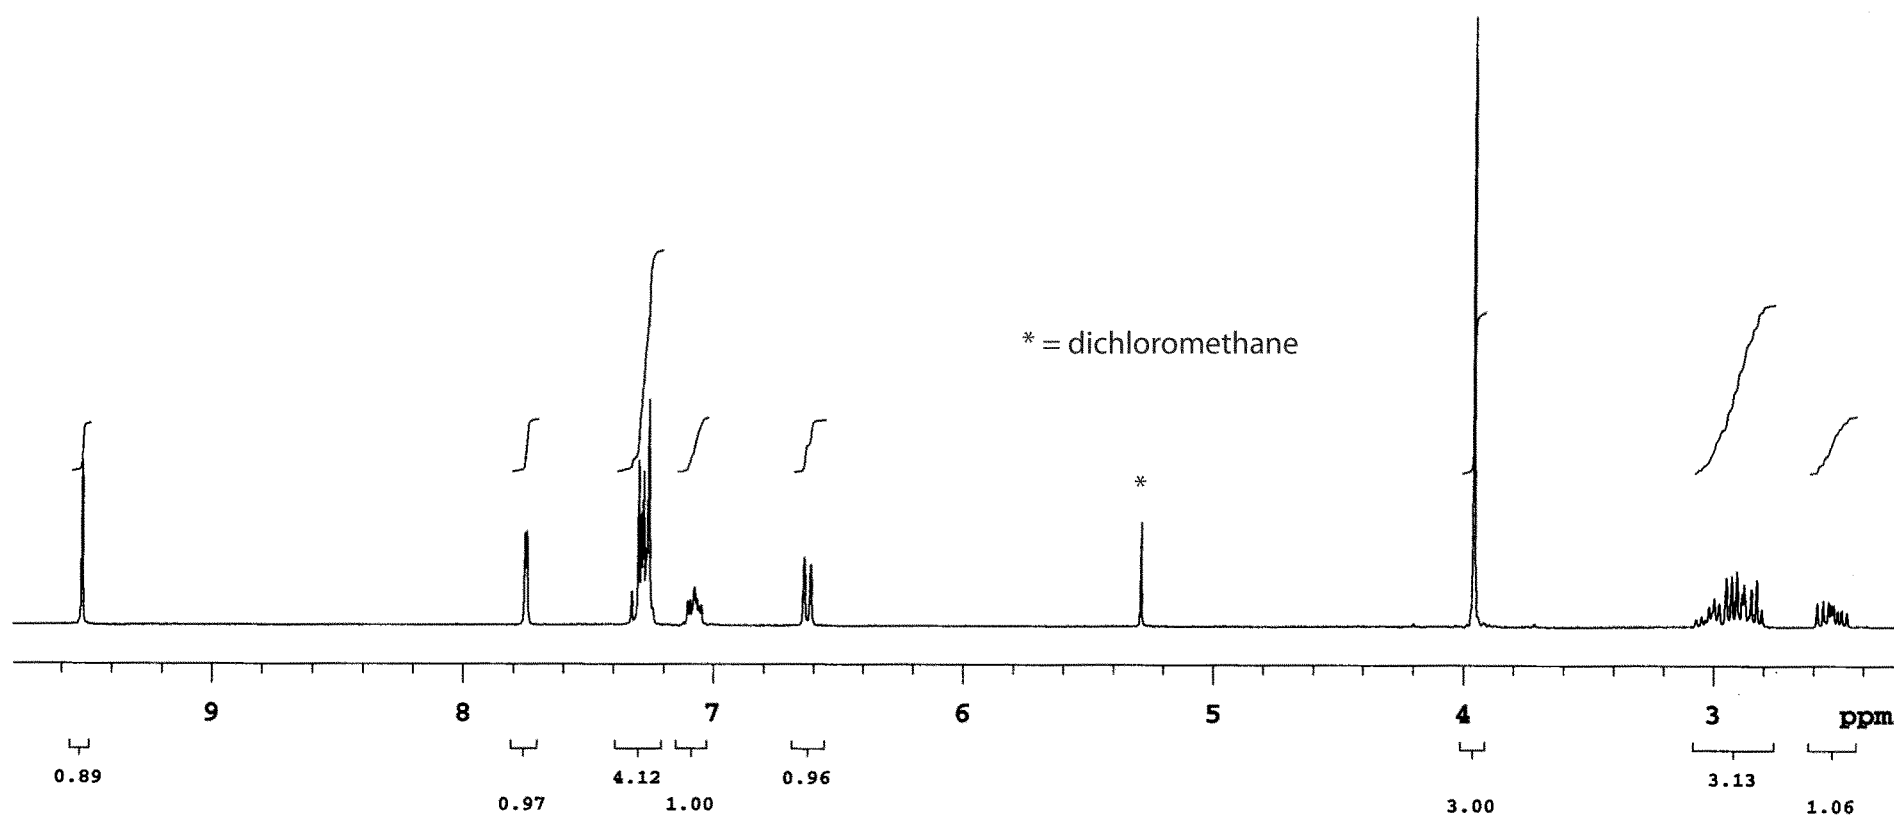

300 MHz  $^1\text{H}$  NMR Spectrum in  $\text{CDCl}_3$

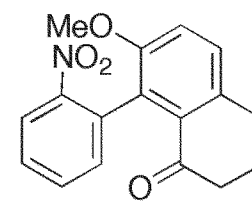

**37**

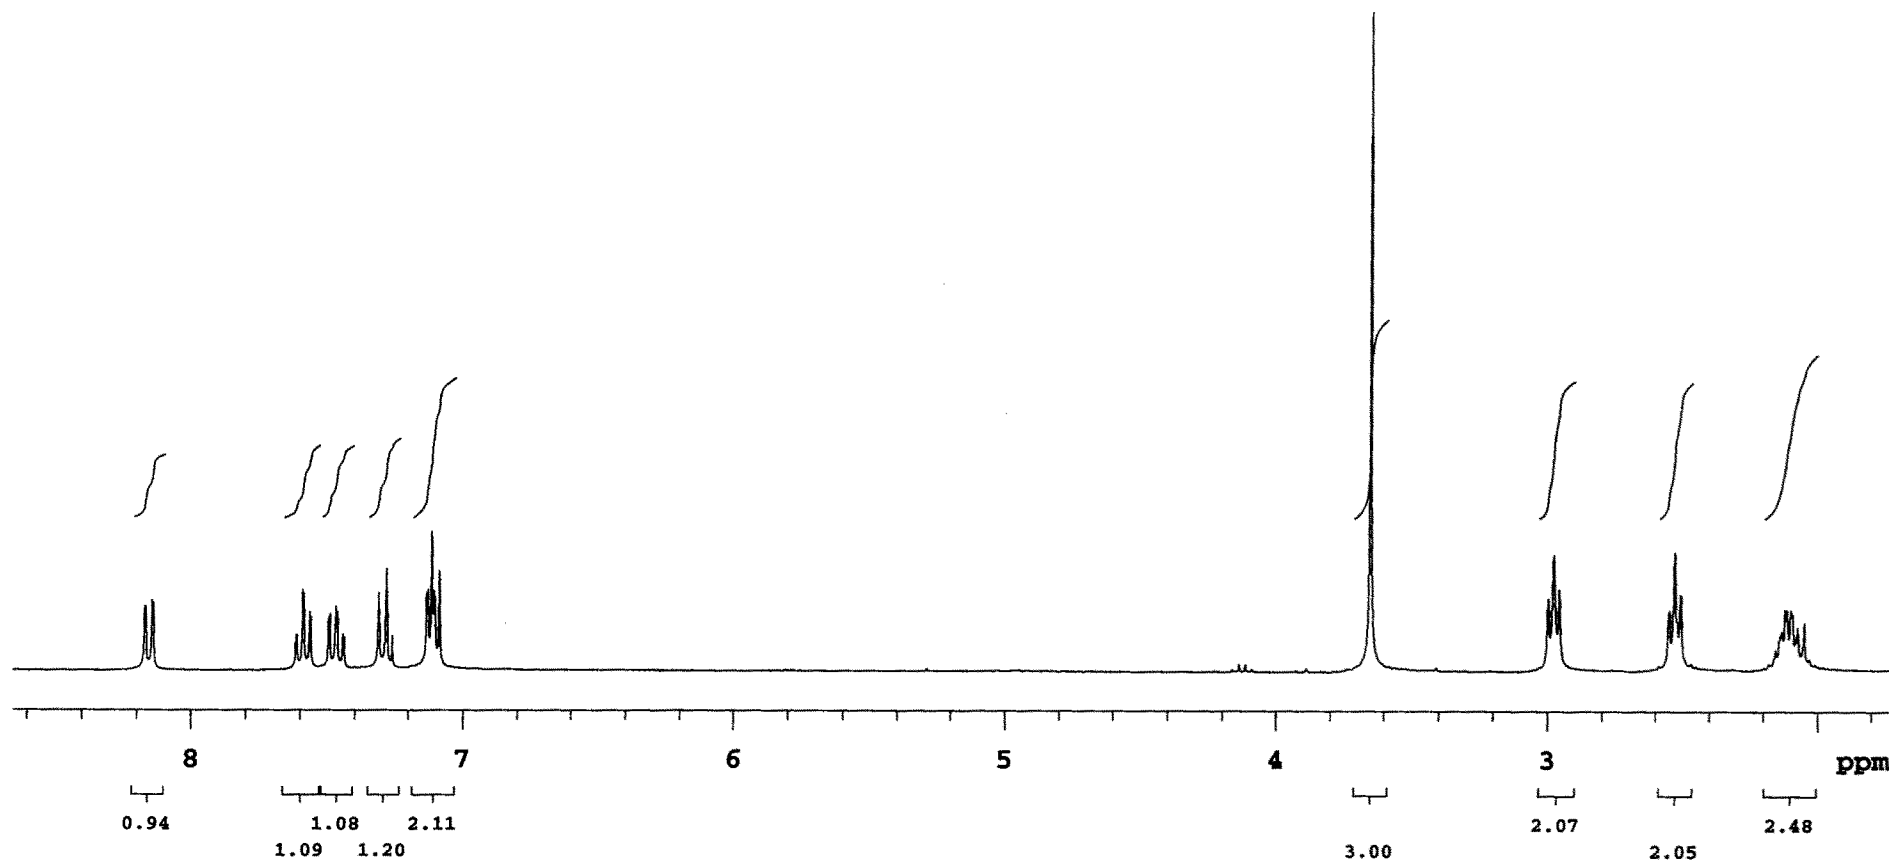

300 MHz  $^1\text{H}$  NMR Spectrum in  $\text{CDCl}_3$

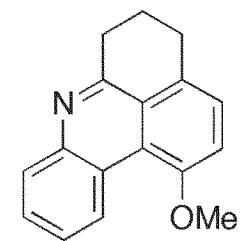

**38**

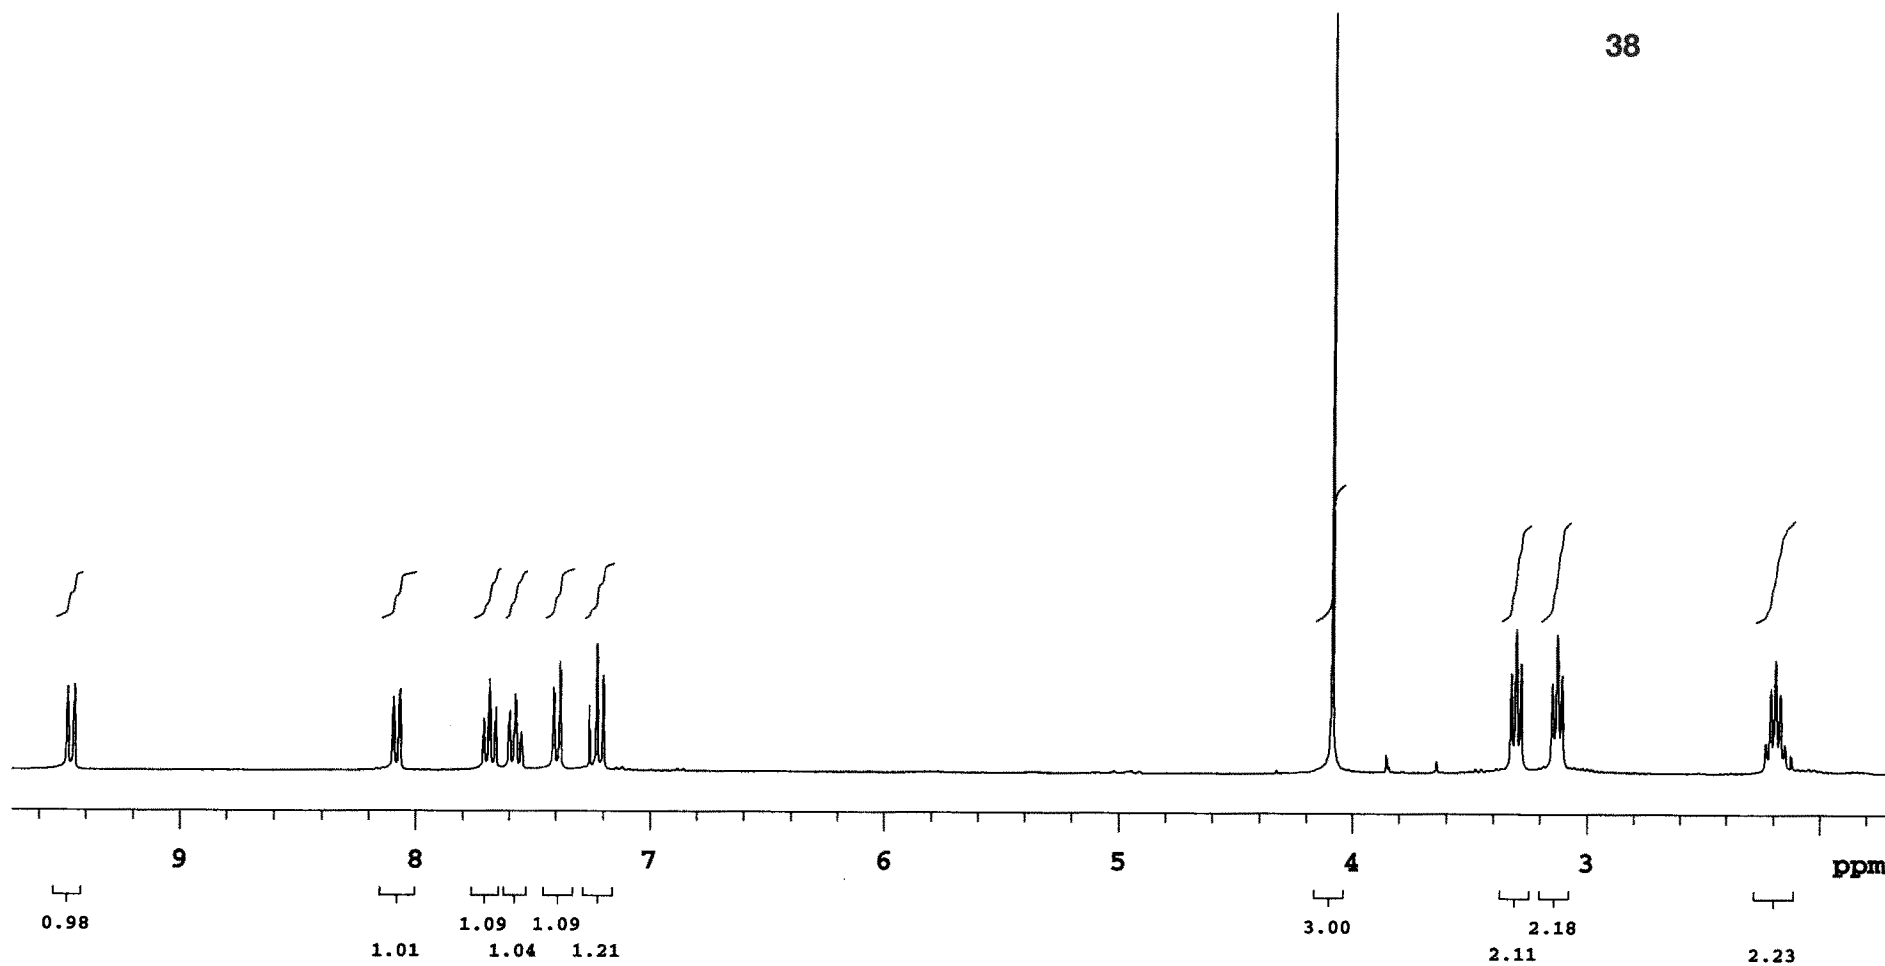

300 MHz  $^1\text{H}$  NMR Spectrum in  $\text{CDCl}_3$

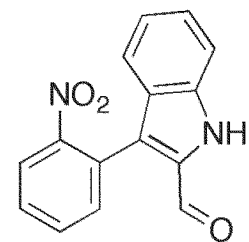

**40**

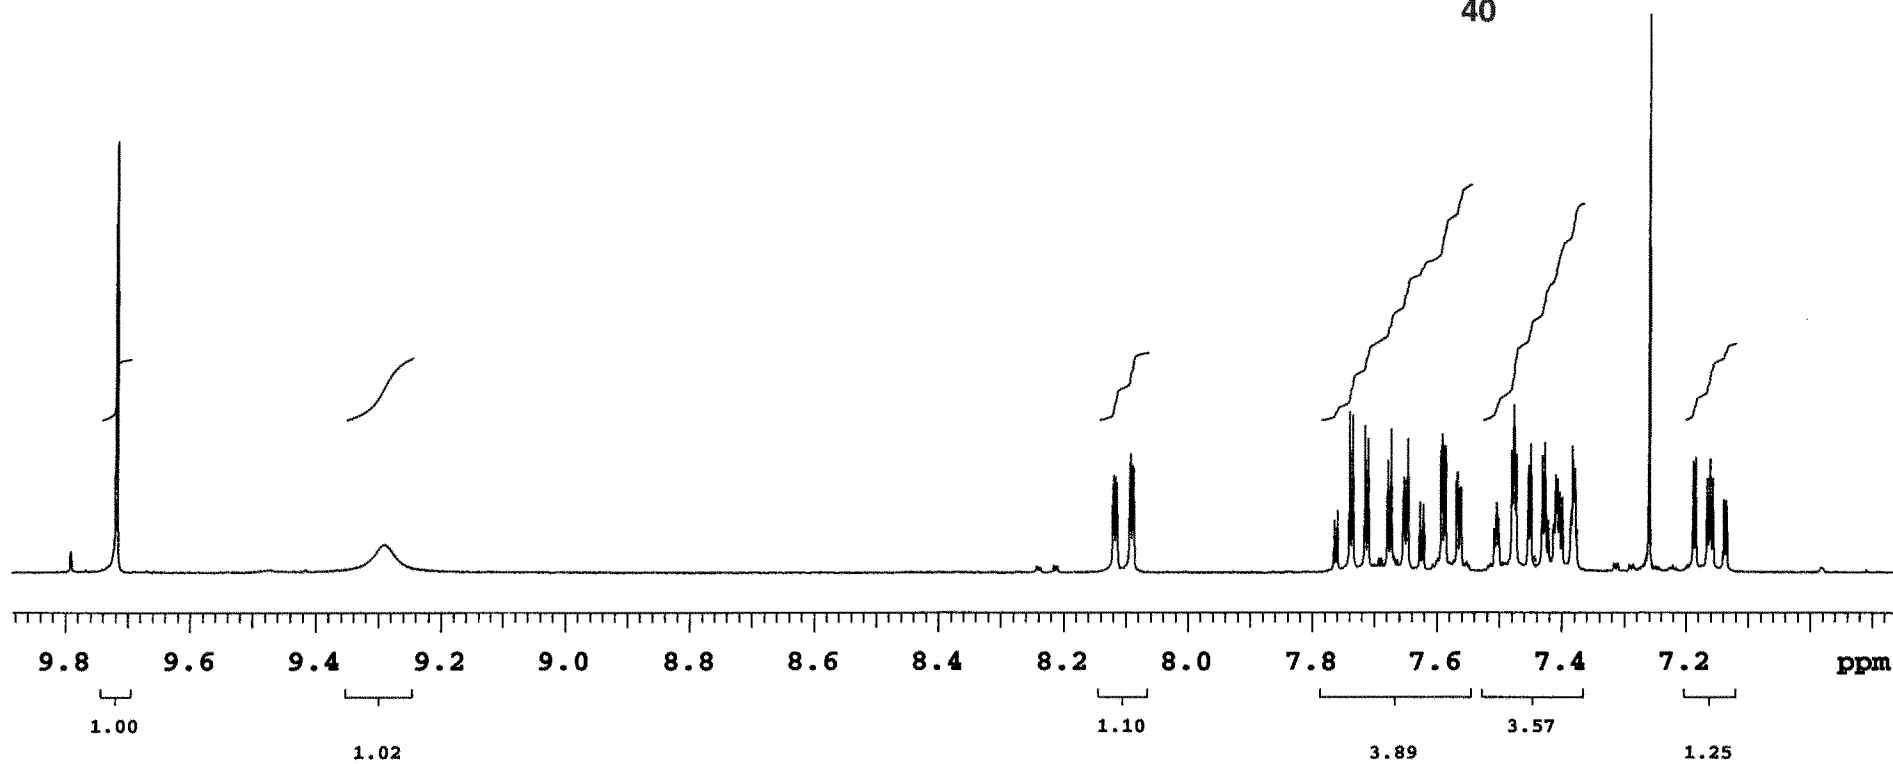



300 MHz  $^1\text{H}$  NMR Spectrum in  $(\text{CD}_3)_2\text{CO}$

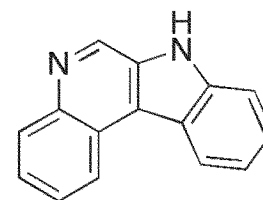

**41**

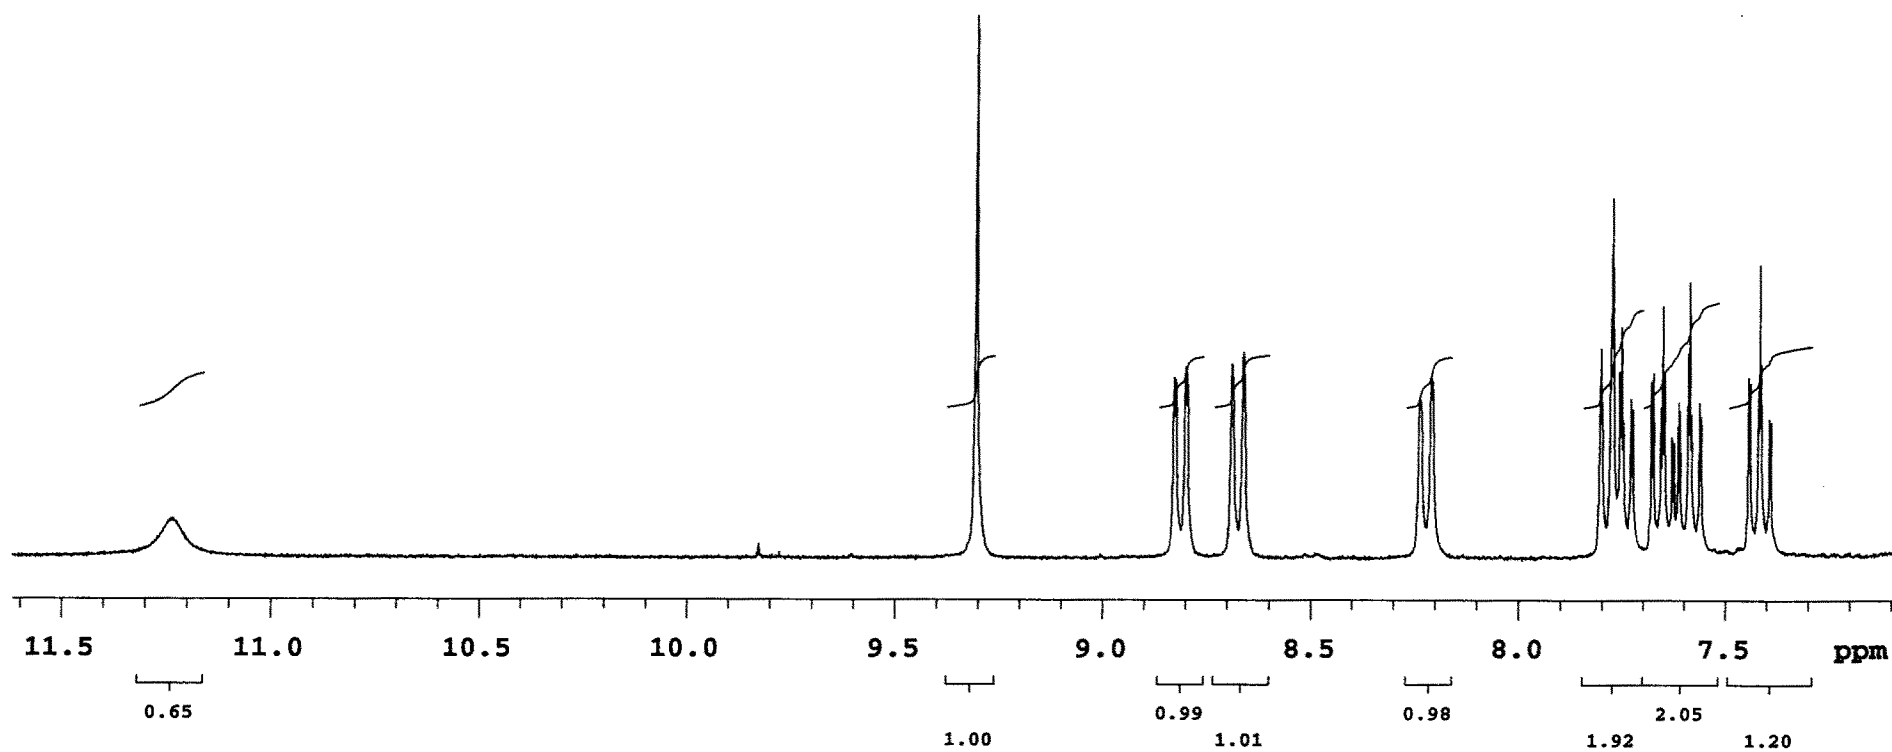

75 MHz  $^1\text{H}$  NMR Spectrum in  $\text{CDCl}_3$

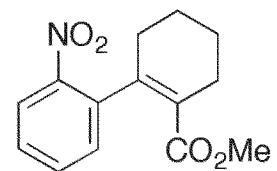

**43**

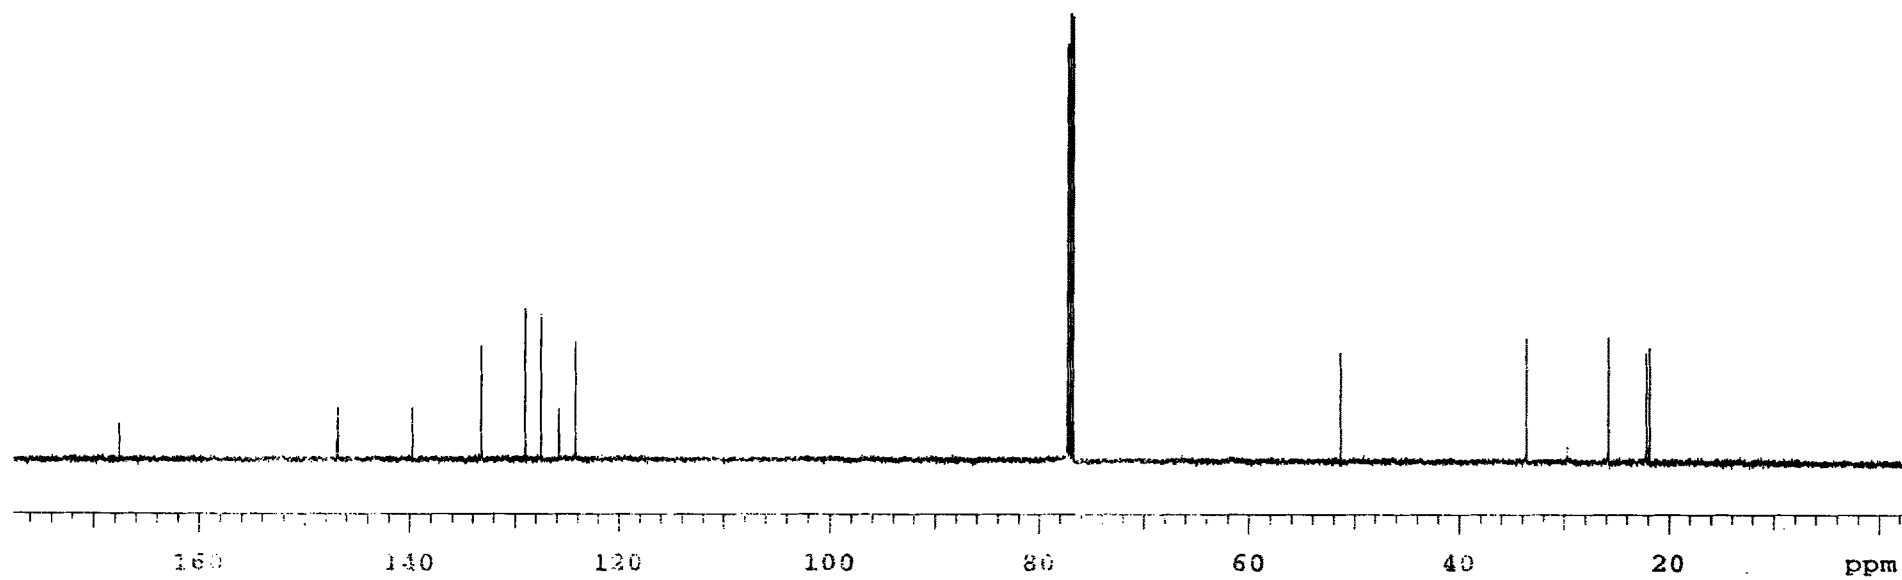

300 MHz  $^1\text{H}$  NMR Spectrum in  $\text{CDCl}_3$

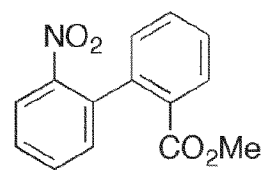

**46**

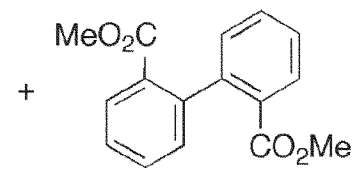

[1,1'-Biphenyl]-2,2'-dicarboxylic  
Acid Dimethyl Ester

ca 1:1 mixture

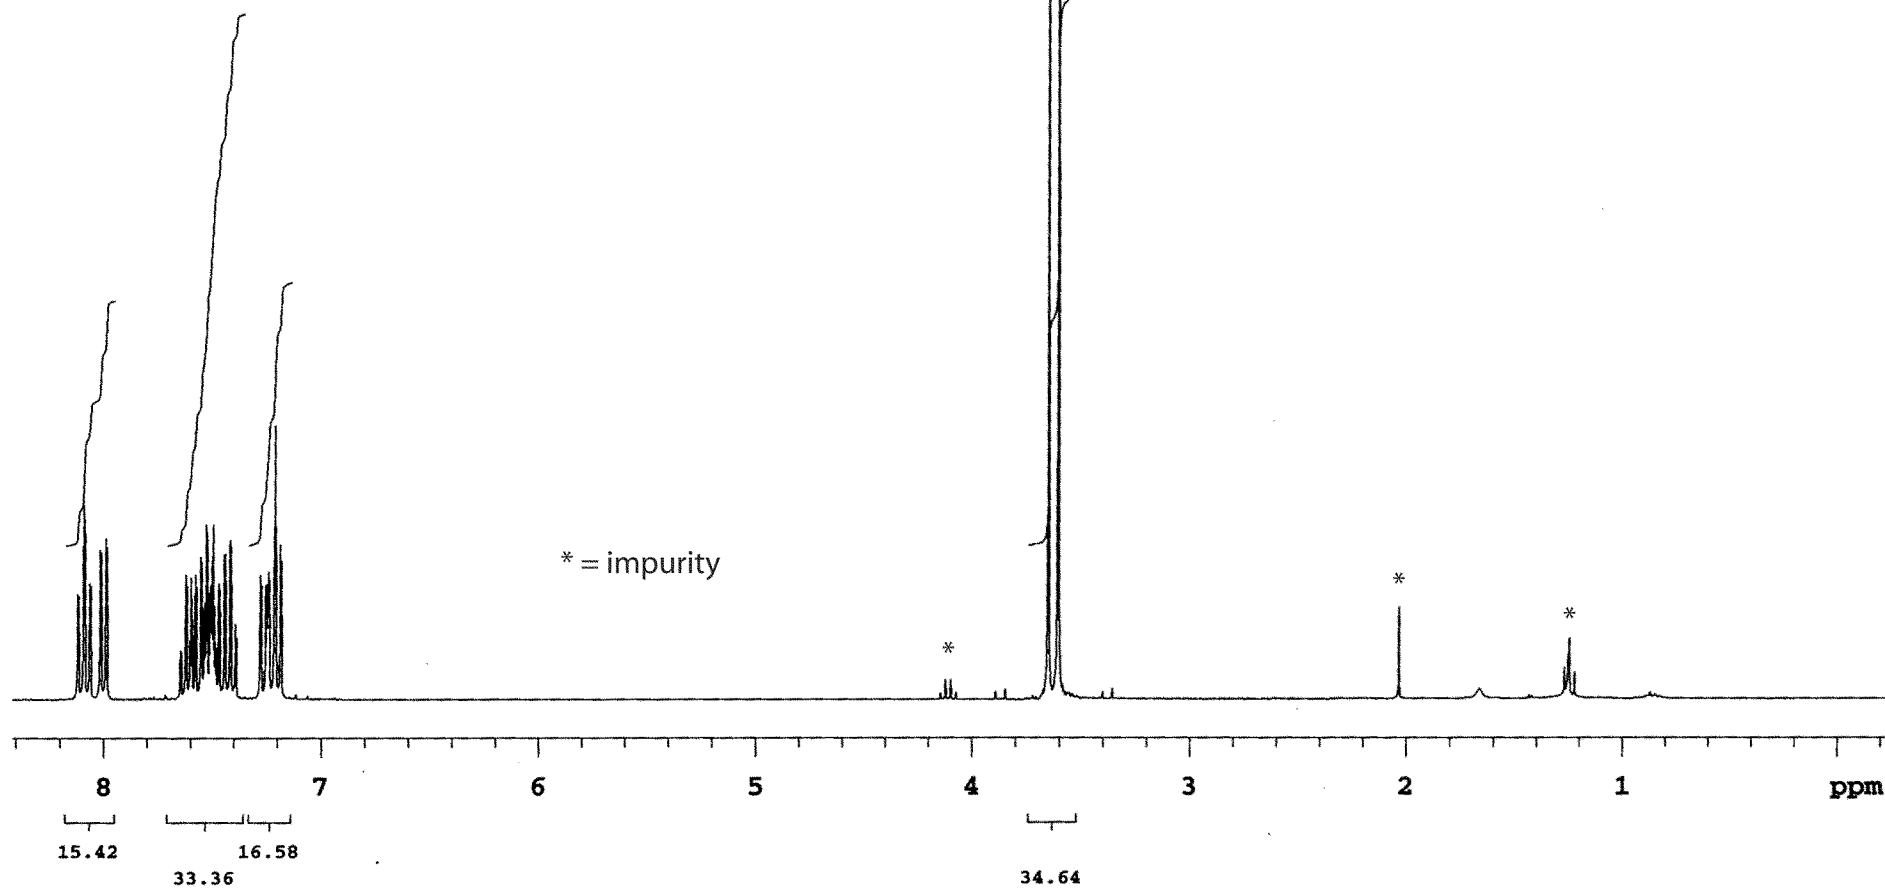

| INDEX | FREQUENCY | PPM   | HEIGHT |
|-------|-----------|-------|--------|
| 1     | 2684.804  | 8.947 | 26.5   |
| 2     | 2682.330  | 8.939 | 27.8   |
| 3     | 2540.872  | 8.468 | 16.7   |
| 4     | 2538.398  | 8.459 | 16.6   |
| 5     | 2532.349  | 8.439 | 17.5   |
| 6     | 2530.012  | 8.432 | 16.9   |
| 7     | 2477.636  | 8.257 | 14.4   |
| 8     | 2476.261  | 8.252 | 14.2   |
| 9     | 2469.525  | 8.230 | 16.1   |
| 10    | 2468.150  | 8.225 | 15.5   |
| 11    | 2326.280  | 7.753 | 6.5    |
| 12    | 2324.906  | 7.748 | 7.2    |
| 13    | 2318.719  | 7.727 | 16.6   |
| 14    | 2317.345  | 7.723 | 17.2   |
| 15    | 2311.296  | 7.703 | 12.8   |
| 16    | 2309.921  | 7.698 | 12.0   |
| 17    | 2298.649  | 7.660 | 11.4   |
| 18    | 2296.999  | 7.655 | 12.6   |
| 19    | 2290.538  | 7.633 | 12.9   |
| 20    | 2289.576  | 7.630 | 10.7   |
| 21    | 2289.026  | 7.628 | 13.8   |
| 22    | 2282.977  | 7.608 | 7.0    |
| 23    | 2281.465  | 7.603 | 6.8    |
| 24    | 2243.798  | 7.478 | 31.1   |
| 25    | 2235.412  | 7.450 | 29.6   |
| 26    | 2183.998  | 7.278 | 17.1   |
| 27    | 2182.486  | 7.273 | 17.8   |
| 28    | 2180.836  | 7.268 | 15.7   |
| 29    | 2176.437  | 7.253 | 15.1   |
| 30    | 2174.925  | 7.248 | 15.0   |
| 31    | 1124.648  | 3.748 | 200.0  |

300 MHz  $^1\text{H}$  NMR Spectrum in  $\text{CDCl}_3$

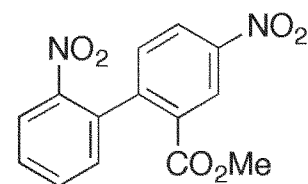

49

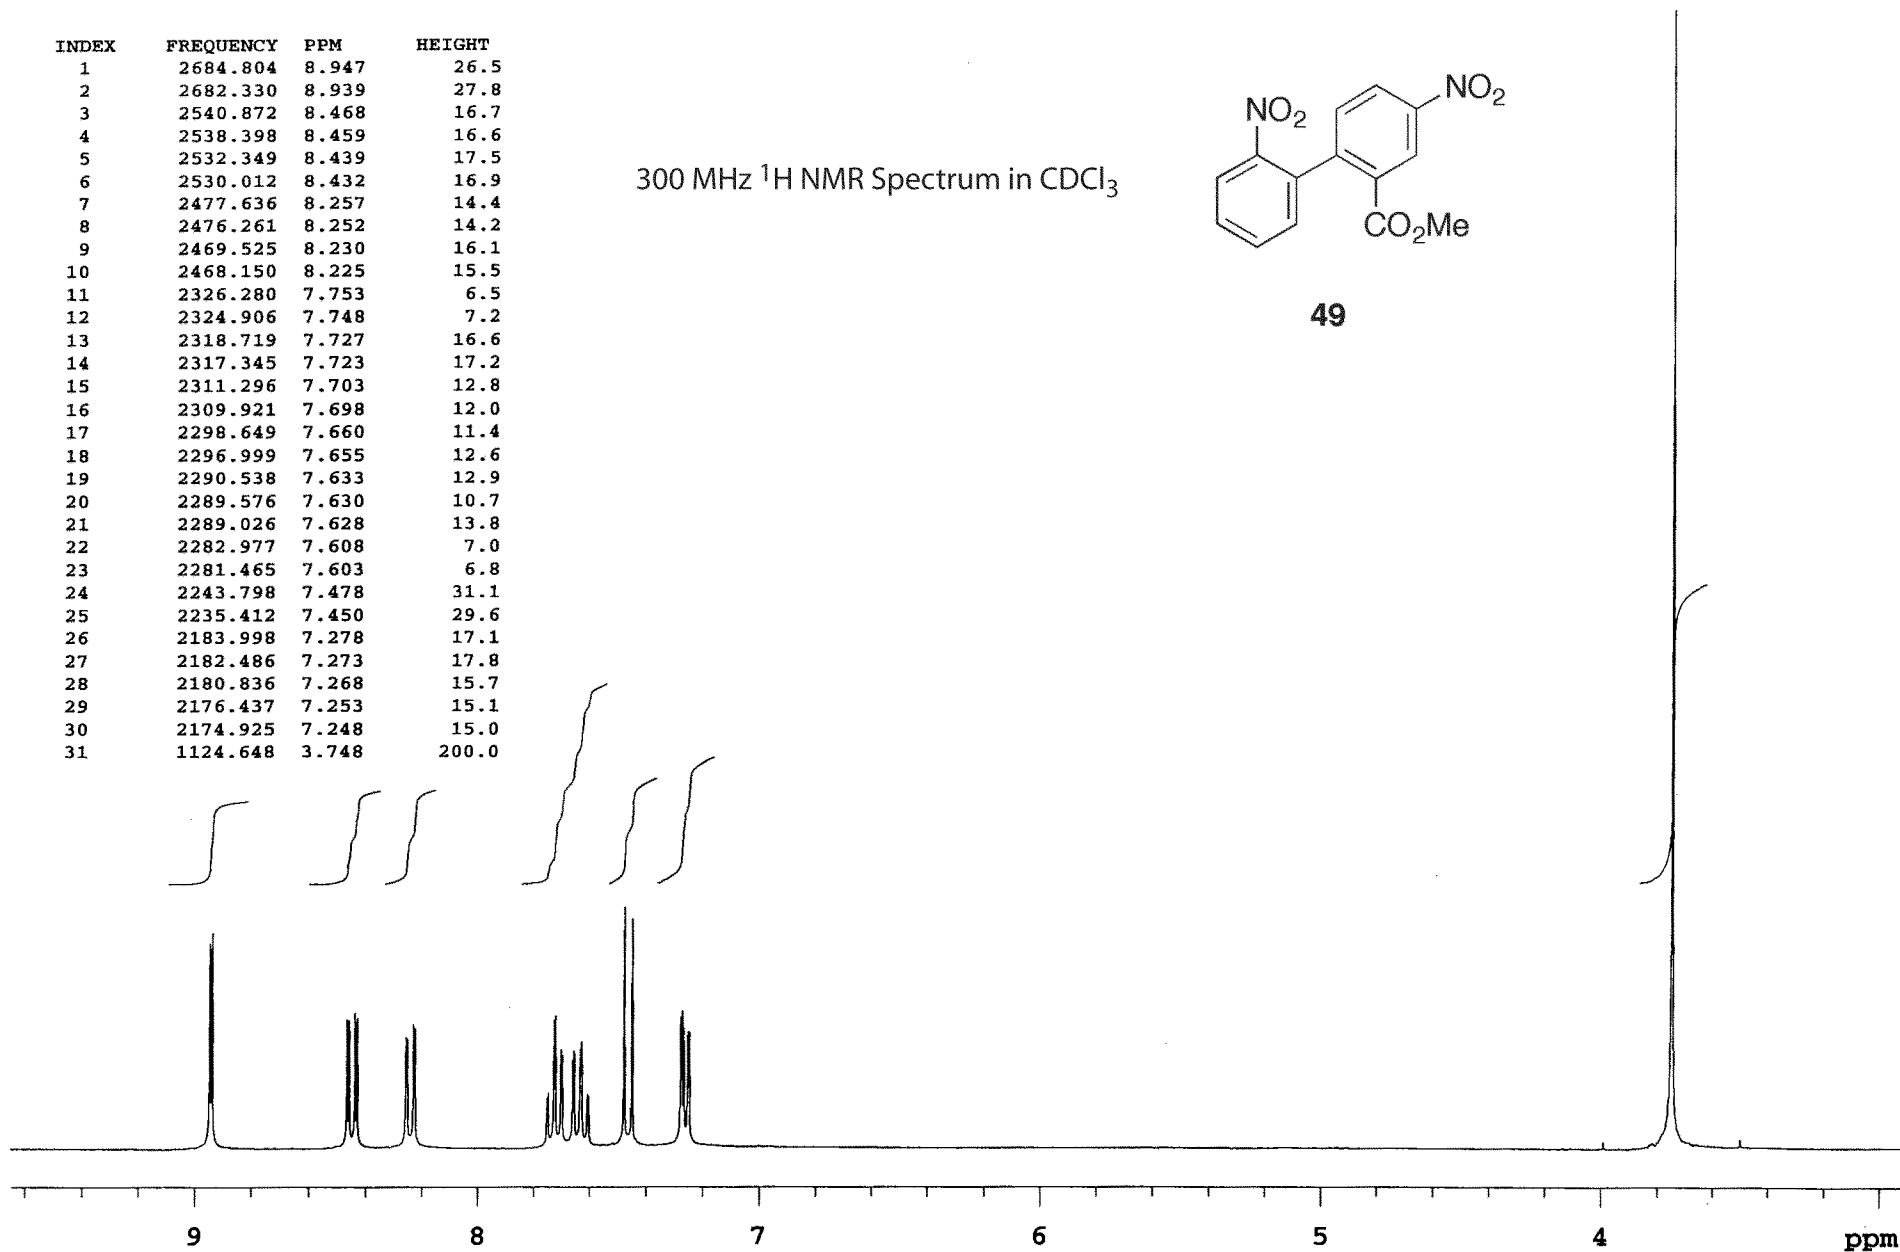

300 MHz  $^1\text{H}$  NMR Spectrum in  $\text{CDCl}_3$

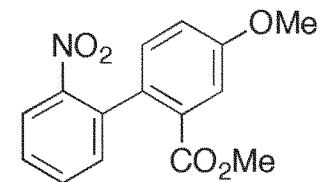

52

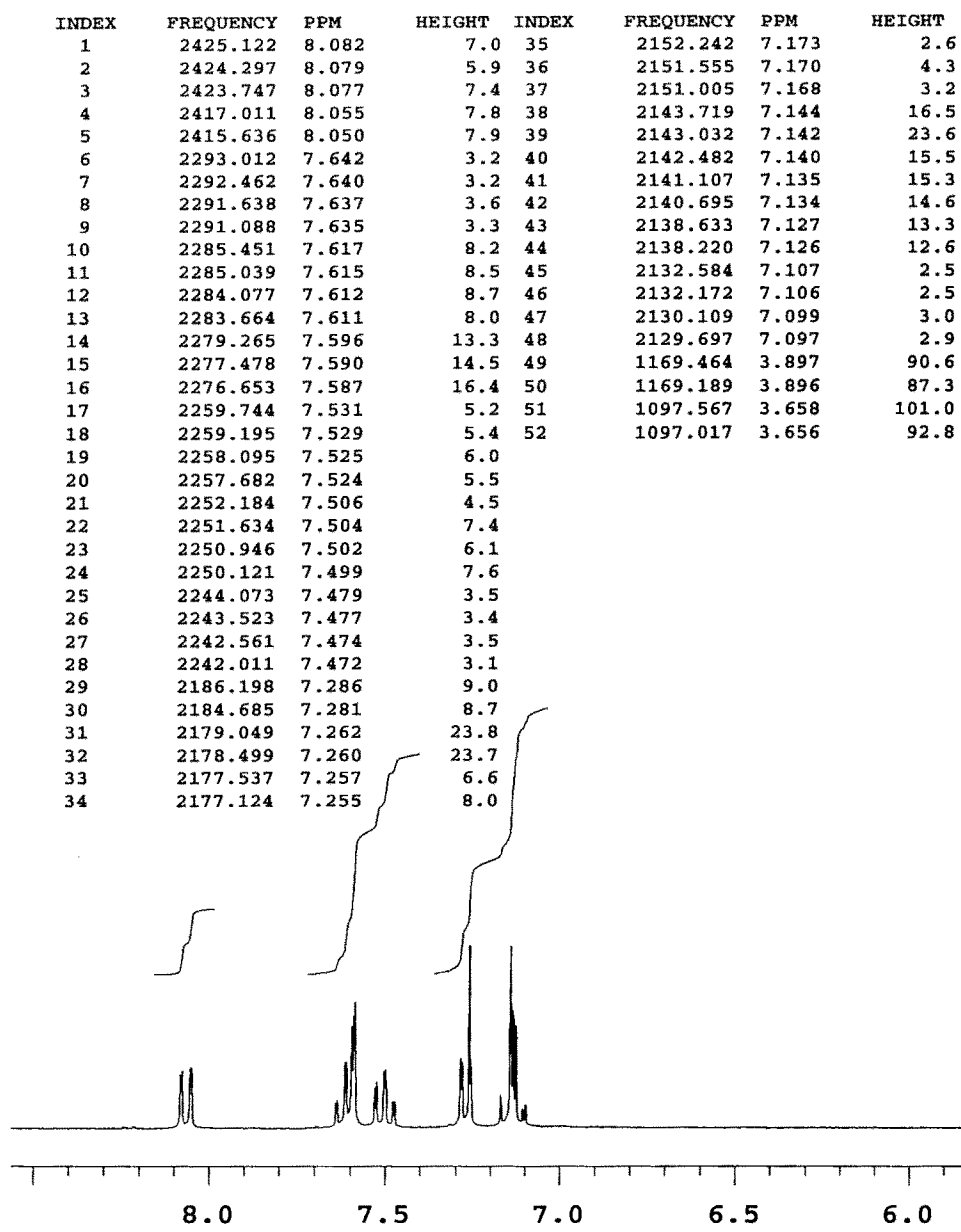

| INDEX | FREQUENCY | PPM   | HEIGHT |
|-------|-----------|-------|--------|
| 1     | 2452.319  | 8.173 | 11.1   |
| 2     | 2451.082  | 8.168 | 11.8   |
| 3     | 2448.608  | 8.160 | 4.5    |
| 4     | 2444.209  | 8.146 | 15.0   |
| 5     | 2442.834  | 8.141 | 18.9   |
| 6     | 2441.322  | 8.136 | 48.9   |
| 7     | 2440.360  | 8.133 | 41.1   |
| 8     | 2375.748  | 7.917 | 14.4   |
| 9     | 2374.786  | 7.914 | 21.4   |
| 10    | 2373.686  | 7.911 | 13.8   |
| 11    | 2307.700  | 7.691 | 5.2    |
| 12    | 2306.326  | 7.686 | 5.5    |
| 13    | 2300.139  | 7.665 | 12.4   |
| 14    | 2298.765  | 7.661 | 12.2   |
| 15    | 2292.716  | 7.641 | 9.3    |
| 16    | 2291.341  | 7.636 | 8.6    |
| 17    | 2276.219  | 7.586 | 8.4    |
| 18    | 2274.707  | 7.581 | 9.1    |
| 19    | 2268.109  | 7.559 | 9.6    |
| 20    | 2267.009  | 7.555 | 9.9    |
| 21    | 2260.685  | 7.534 | 5.6    |
| 22    | 2259.173  | 7.529 | 5.2    |
| 23    | 2189.888  | 7.298 | 12.1   |
| 24    | 2188.376  | 7.293 | 12.3   |
| 25    | 2182.464  | 7.273 | 10.9   |
| 26    | 2180.815  | 7.268 | 10.8   |
| 27    | 2178.478  | 7.260 | 7.1    |
| 28    | 1178.928  | 3.929 | 122.8  |
| 29    | 1104.281  | 3.680 | 123.4  |

300 MHz  $^1\text{H}$  NMR Spectrum in  $(\text{CD}_3)_2\text{SO}$

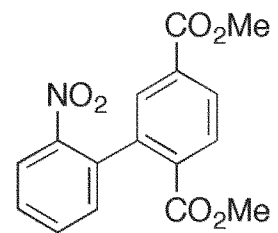

55

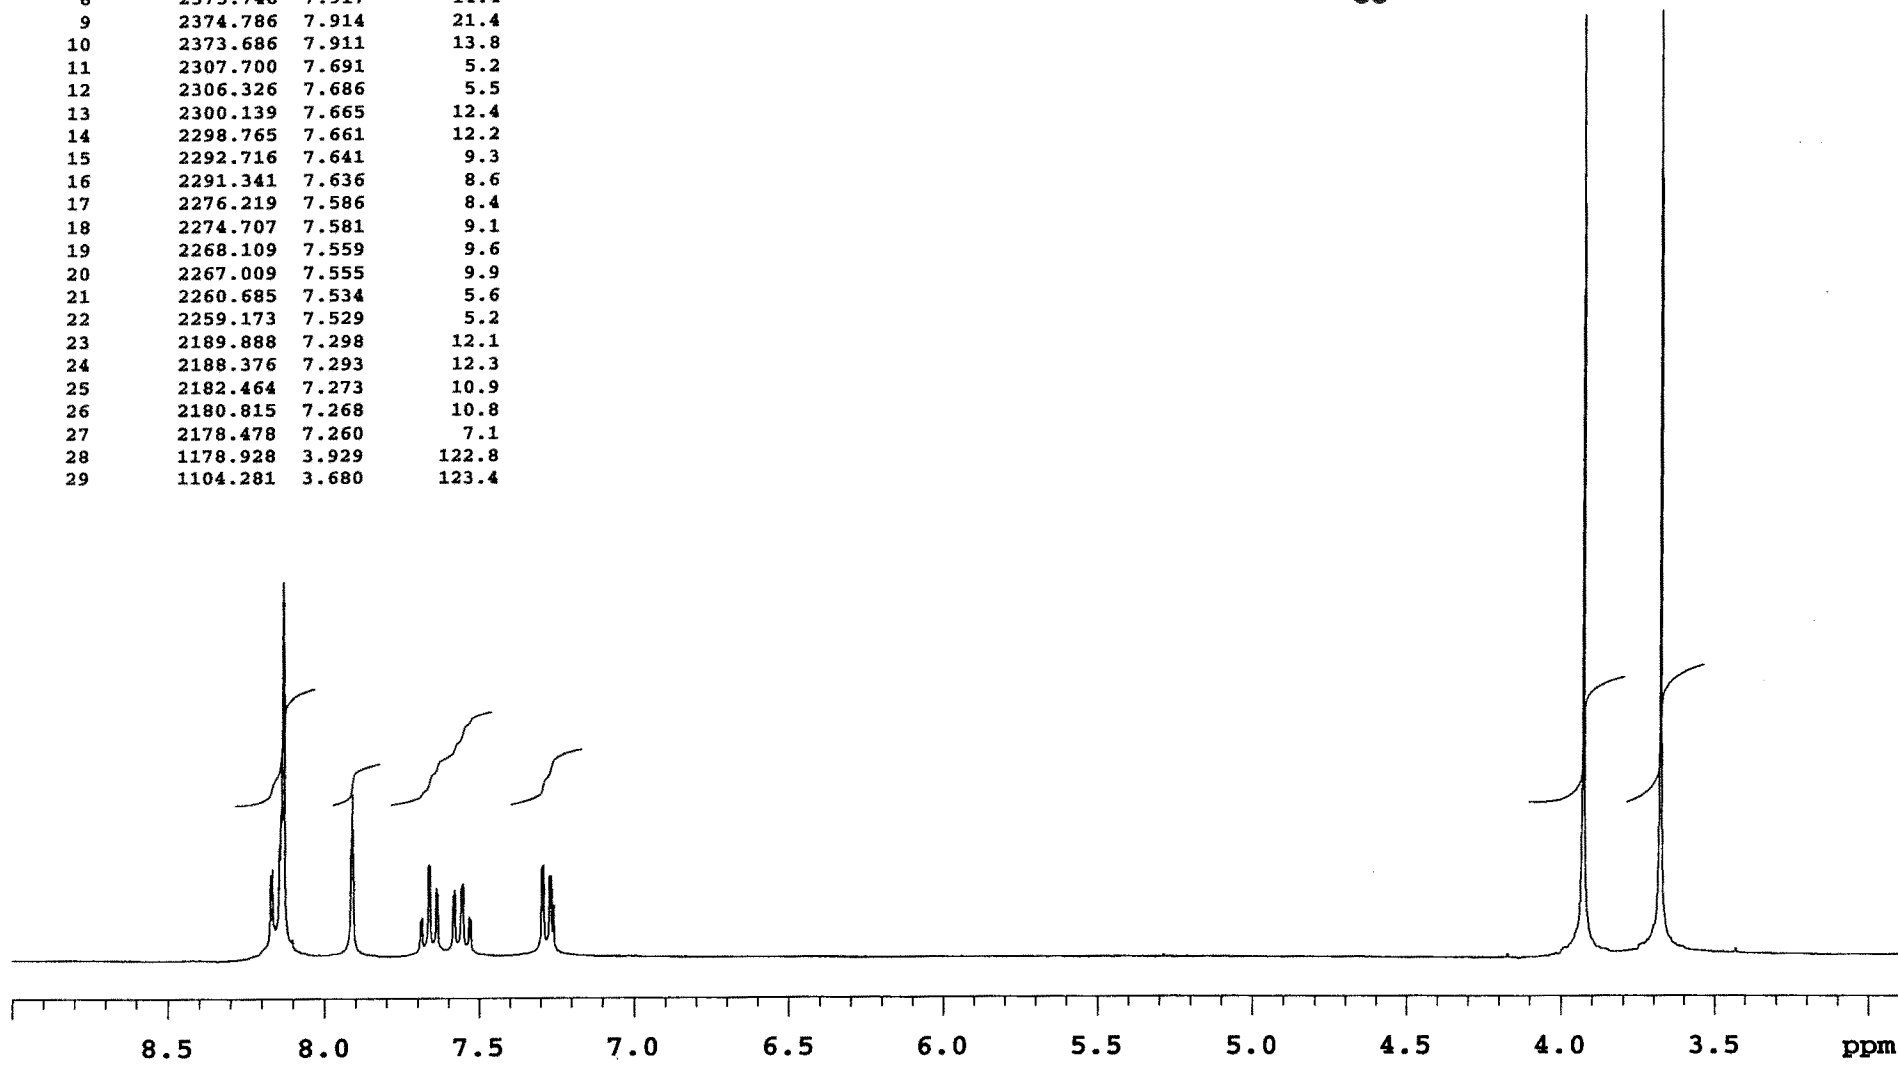

| INDEX | FREQUENCY | PPM    | HEIGHT |
|-------|-----------|--------|--------|
| 1     | 3567.219  | 11.888 | 16.1   |
| 2     | 2690.155  | 8.965  | 38.3   |
| 3     | 2534.676  | 8.447  | 44.0   |
| 4     | 2526.428  | 8.420  | 49.7   |
| 5     | 2495.359  | 8.316  | 51.1   |
| 6     | 2494.260  | 8.312  | 50.6   |
| 7     | 2444.495  | 8.146  | 24.9   |
| 8     | 2436.110  | 8.119  | 21.2   |
| 9     | 2270.045  | 7.565  | 9.4    |
| 10    | 2261.934  | 7.538  | 19.5   |
| 11    | 2254.648  | 7.514  | 15.7   |
| 12    | 2221.518  | 7.403  | 27.2   |
| 13    | 2213.269  | 7.376  | 19.5   |
| 14    | 2198.697  | 7.327  | 14.3   |
| 15    | 2191.686  | 7.304  | 20.6   |
| 16    | 2183.576  | 7.277  | 11.4   |
| 17    | 1188.287  | 3.960  | 142.4  |

300 MHz  $^1\text{H}$  NMR Spectrum in  $(\text{CD}_3)_2\text{SO}$

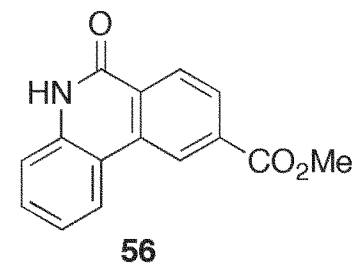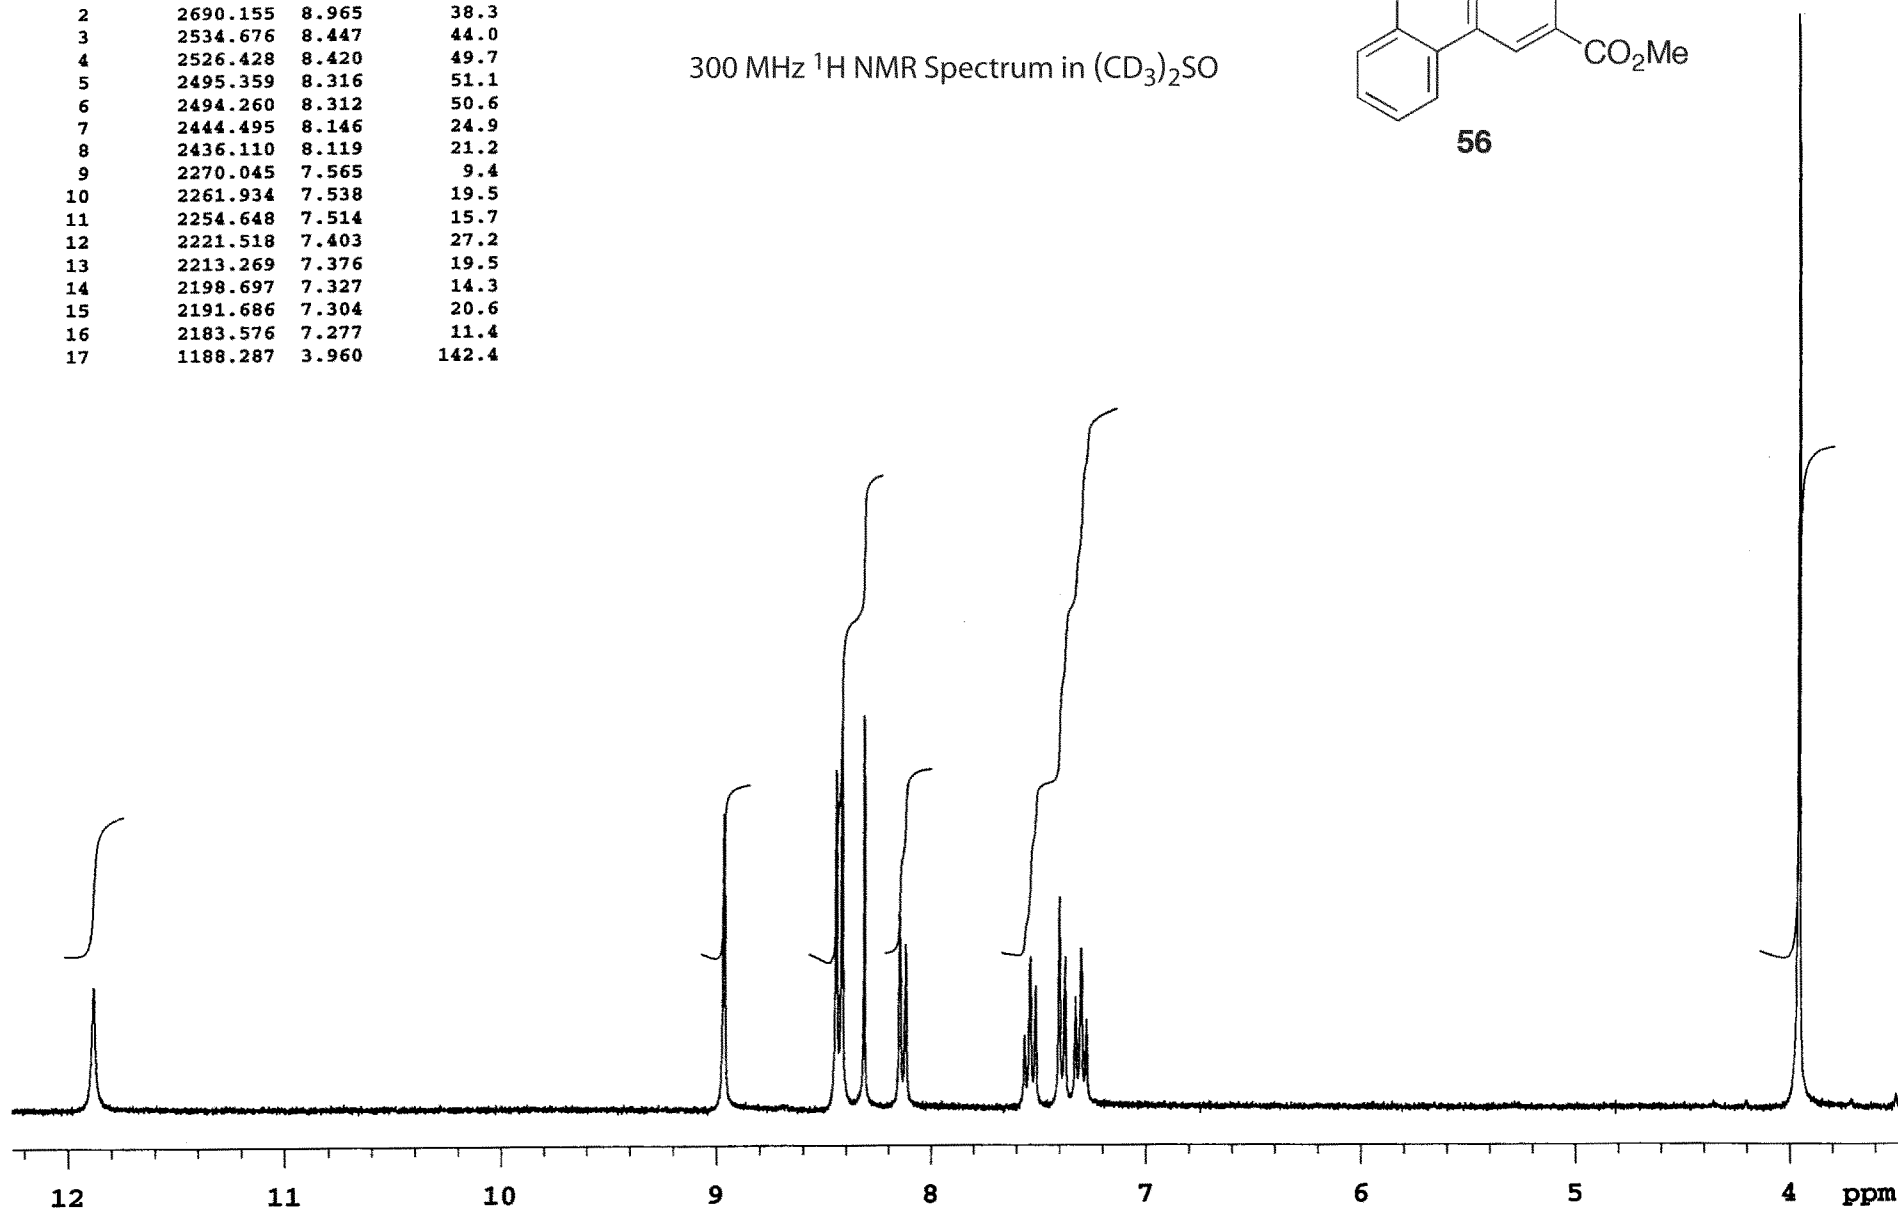

300 MHz  $^1\text{H}$  NMR Spectrum in  $\text{CDCl}_3$

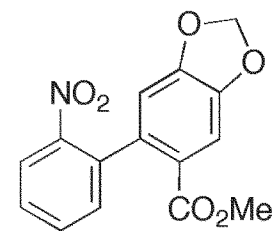

**58**

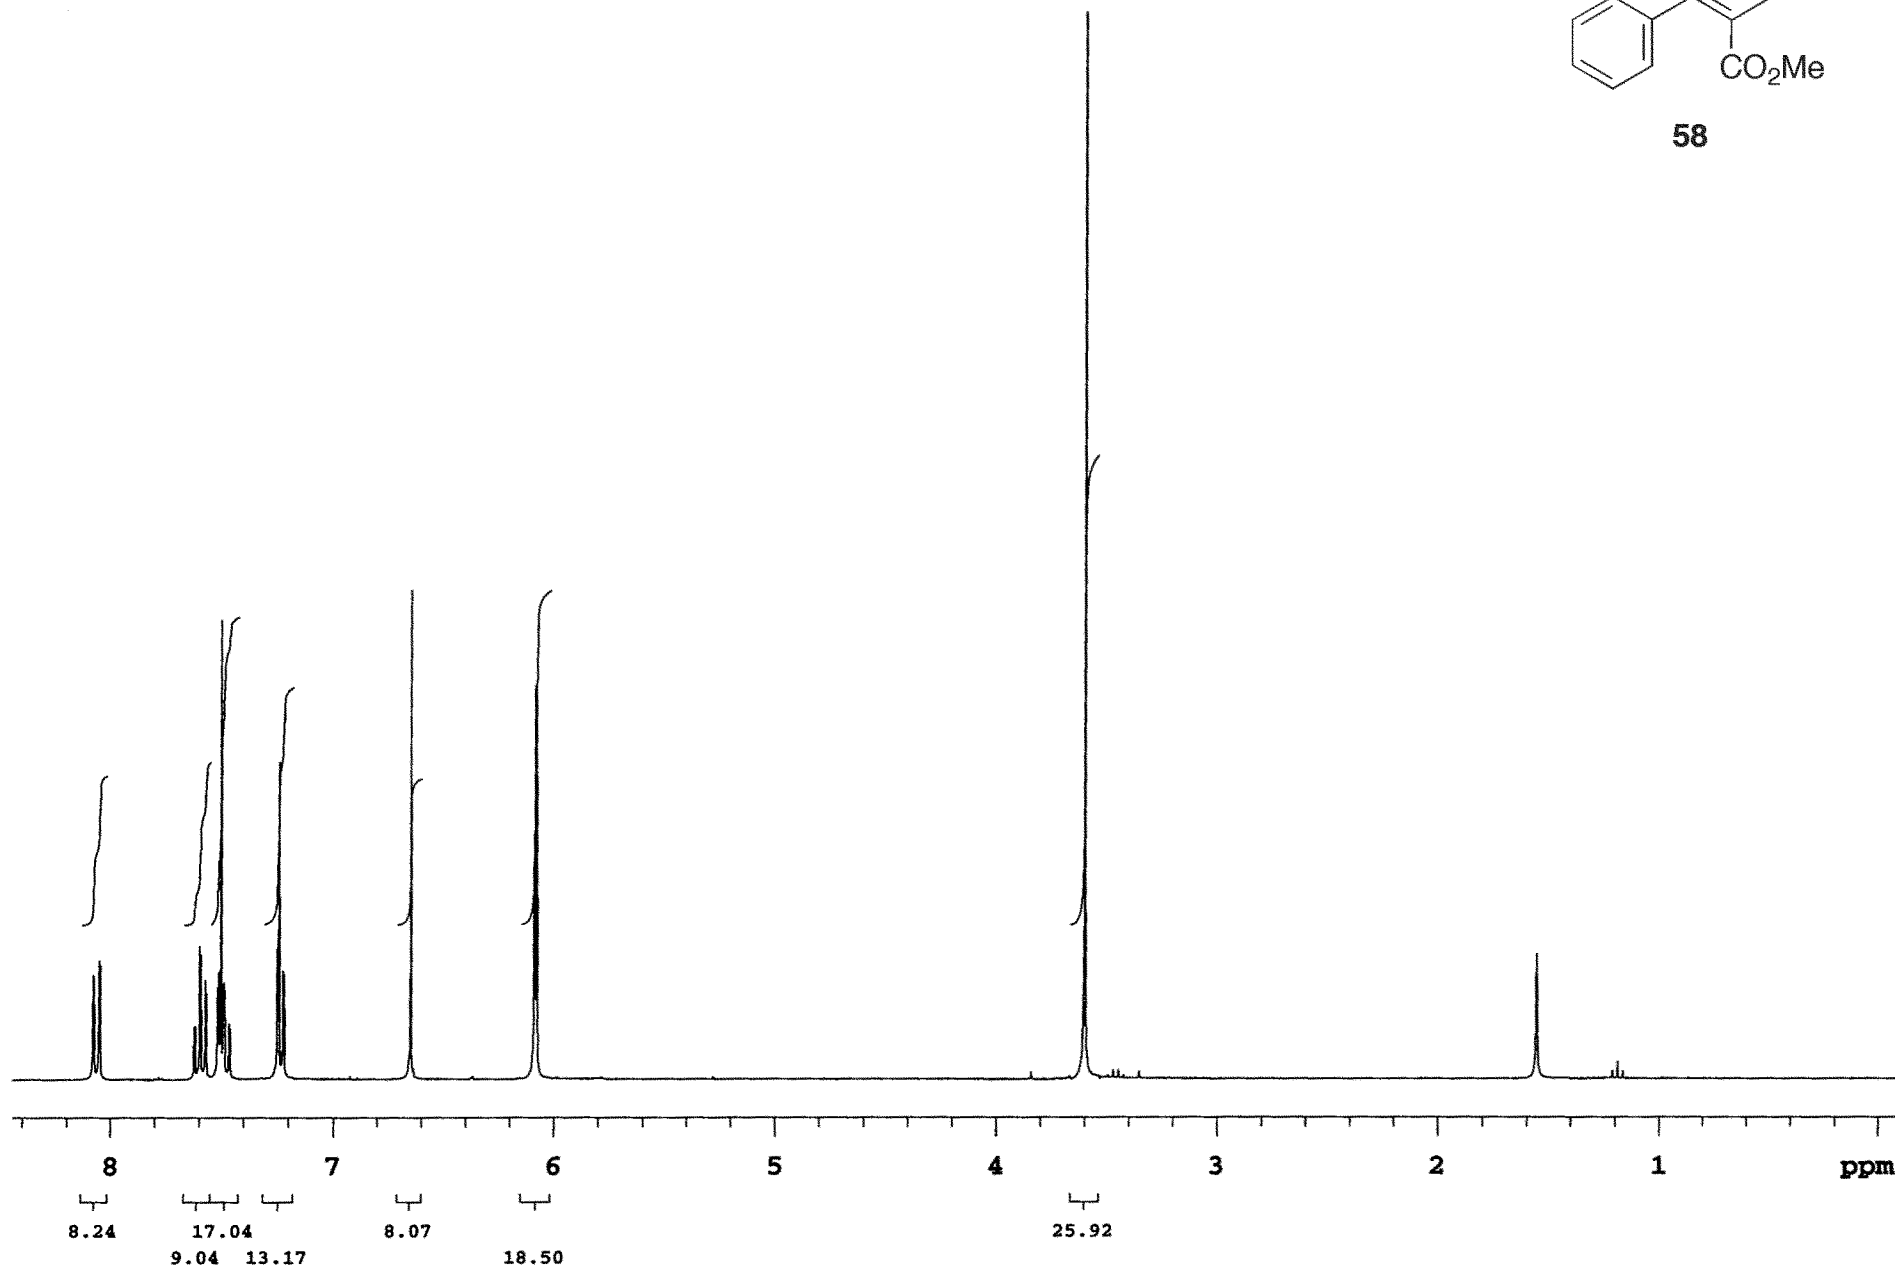

Supplement: Supplementary file 1 [file 5169085]
